# Supplementary material for: HPCO—A Phosphorus‐Containing Analogue of Isocyanic Acid
Source: PubMed Central journal article supplement (PMC5396272; doi:10.1002/anie.201700368), 2017-03-02
Supplement: ANIE-56-3911-s001.pdf [file ANIE-56-3911-s001.pdf]

Supporting Information

**HPCO—A Phosphorus-Containing Analogue of Isocyanic Acid**

*Alexander Hinz, René Labbow, Chris Rennick, Axel Schulz, and Jose M. Goicoechea\**

anie\_201700368\_sm\_miscellaneous\_information.pdf

## Supporting Information

|                                                                   |    |
|-------------------------------------------------------------------|----|
| <b>1. Experimental section</b> .....                              | 2  |
| <b>1.1 HPCO</b> .....                                             | 3  |
| NMR spectra of HPCO .....                                         | 4  |
| NMR spectra of DPCO .....                                         | 10 |
| Gas-phase IR spectra .....                                        | 18 |
| <b>1.2 [D<sub>1</sub>]-stearic acid</b> .....                     | 22 |
| <b>2. Computational data</b> .....                                | 24 |
| <b>3.1 HPCO and DPCO</b> .....                                    | 24 |
| <b>3.1.1 HPCO – displacement vectors for the vibrations</b> ..... | 25 |
| <b>3.1.2 DPCO – displacement vectors for the vibrations</b> ..... | 26 |
| <b>3.1.3 HPCO – vibrational analysis</b> .....                    | 27 |
| <b>3.1.4 DPCO – vibrational analysis</b> .....                    | 37 |
| <b>3.2 Isomers of HPCO</b> .....                                  | 46 |
| <b>3.3 Isomers of (HPCO)<sub>2</sub></b> .....                    | 47 |
| <b>3.4 Isomers of (HPCO)<sub>3</sub></b> .....                    | 52 |
| <b>3.5 Isomers of (HPCO)<sub>4</sub></b> .....                    | 61 |
| <b>4. References</b> .....                                        | 91 |

## 1. Experimental section

*General synthetic methods.* All reactions and product manipulations were carried out under an inert atmosphere of argon or dinitrogen using standard Schlenk-line or glovebox techniques (MBraun UNIlab glovebox maintained at < 0.1 ppm H<sub>2</sub>O and < 0.1 ppm O<sub>2</sub>).

[Na(dioxane)]PCO was prepared according to a literature procedure, but dried at 60 °C for 8 hours to reduce the dioxane content.<sup>[1]</sup> Hexane (hex; Sigma-Aldrich, HPLC grade) was purified using an MBraun SPS-800 solvent system. Tetrahydrofuran (THF; Sigma-Aldrich, HPLC grade) was distilled over sodium metal/benzophenone. D<sub>2</sub>O (Acros, 99.8%) and C<sub>6</sub>D<sub>6</sub> (Sigma-Aldrich, 99.5%) were used as received. Stearic acid (Sigma-Aldrich, 95%) and Me<sub>3</sub>SiCl (Sigma-Aldrich, 99.5%) were used as received. NEt<sub>3</sub> (Sigma-Aldrich, 99.5%) was distilled from CaH<sub>2</sub> and degassed prior to use. [D<sub>8</sub>]-toluene (Sigma-Aldrich, 99.5%), CD<sub>2</sub>Cl<sub>2</sub> (Sigma-Aldrich, 99.5%), [D<sub>8</sub>]-THF (Sigma-Aldrich, 99.5%) were dried over CaH<sub>2</sub> and stored under argon in gas-tight ampoules over activated 3 Å molecular sieves.

**Characterization techniques:** <sup>1</sup>H, <sup>1</sup>H{<sup>31</sup>P}, <sup>2</sup>H, <sup>13</sup>C, <sup>13</sup>C{<sup>1</sup>H}, <sup>13</sup>C-DEPT135, <sup>31</sup>P, and <sup>31</sup>P{<sup>1</sup>H} NMR spectra were acquired at 223 K at 400.2 (<sup>1</sup>H), 100.6 (<sup>13</sup>C) and 162.0 (<sup>31</sup>P) MHz, respectively, on a Bruker Avance 300 HD Ascend NMR spectrometer if not stated otherwise. <sup>1</sup>H and <sup>13</sup>C NMR spectra were referenced to the most downfield solvent resonance.<sup>[2]</sup> <sup>31</sup>P spectra were externally referenced to an 85% solution of H<sub>3</sub>PO<sub>4</sub> in H<sub>2</sub>O (δ = 0 ppm). Gas-phase IR spectra were recorded at ambient conditions in cells with 10 cm path length and NaCl windows.

## 1.1 HPCO

Representative setup: A mixture of stearic acid or [D<sub>1</sub>]-stearic acid (120 mg, 0.420 mmol) and [Na(dioxane)]PCO (45 mg, 0.265 mmol) was heated with an oil bath in vacuo in a Schlenk tube connected to an NMR tube with 0.5 ml of an NMR solvent ([D<sub>8</sub>]-toluene, CD<sub>2</sub>Cl<sub>2</sub>, [D<sub>8</sub>]-THF) frozen in a liquid nitrogen cooling trap. At 60 °C, gas evolution commenced in. The temperature was increased stepwise (5 K every 15 min) until 120 °C were reached. In the NMR tube, a yellow condensate formed. The nitrogen cooling bath was removed and quickly replaced by a dry ice/isopropanol cooling bath (−78 °C). Upon thawing, the solvent dissolved most of the yellow condensate, forming a yellow solution which was subjected to NMR experiments.

### <sup>1</sup>HP<sup>12</sup>CO

<sup>1</sup>H NMR ([D<sub>8</sub>]-toluene, 223 K): 0.25 (<sup>1</sup>J<sub>HP</sub> = 188 Hz). <sup>31</sup>P NMR ([D<sub>8</sub>]-toluene, 223 K): −316.7 (<sup>1</sup>J<sub>PH</sub> = 188 Hz). <sup>13</sup>C NMR ([D<sub>8</sub>]-toluene, 223 K): 201.4 (<sup>1</sup>J<sub>CP</sub> = 102, <sup>2</sup>J<sub>CH</sub> = 10.5 Hz). <sup>1</sup>H NMR (CD<sub>2</sub>Cl<sub>2</sub>, 223 K): 1.09 (<sup>1</sup>J<sub>HP</sub> = 189 Hz). <sup>31</sup>P NMR (CD<sub>2</sub>Cl<sub>2</sub>, 223 K): −312.8 (<sup>1</sup>J<sub>PH</sub> = 189 Hz). <sup>13</sup>C NMR (CD<sub>2</sub>Cl<sub>2</sub>, 223 K): 201.5 (<sup>1</sup>J<sub>CP</sub> = 98 Hz). <sup>1</sup>H NMR ([D<sub>8</sub>]-THF, 193 K): 1.32 (<sup>1</sup>J<sub>HP</sub> = 192 Hz). <sup>31</sup>P NMR ([D<sub>8</sub>]-THF, 193 K): −316.7 (<sup>1</sup>J<sub>PH</sub> = 192 Hz). <sup>13</sup>C NMR ([D<sub>8</sub>]-THF, 193 K): 202.2 (<sup>1</sup>J<sub>CP</sub> = 101 Hz). IR (gas, cm<sup>−1</sup>): 2707, 2306, 2011 (vs), 1394, 1241, 1066, 873, 697, 473, 389.

### <sup>1</sup>HP<sup>13</sup>CO

<sup>31</sup>P NMR ([D<sub>8</sub>]-toluene, 223 K): −316.7 (<sup>1</sup>J<sub>PH</sub> = 188, <sup>1</sup>J<sub>PC</sub> = 102 Hz). <sup>31</sup>P NMR (CD<sub>2</sub>Cl<sub>2</sub>, 223 K): −312.8 (<sup>1</sup>J<sub>PH</sub> = 189, <sup>1</sup>J<sub>PC</sub> = 98 Hz). IR (gas, cm<sup>−1</sup>): 1963.

### <sup>2</sup>HP<sup>12</sup>CO

<sup>2</sup>H NMR ([D<sub>8</sub>]-toluene, 223 K): 0.29 (<sup>1</sup>J<sub>DP</sub> = 29.6 Hz). <sup>31</sup>P NMR ([D<sub>8</sub>]-toluene, 223 K): −317.7 (<sup>1</sup>J<sub>PD</sub> = 29.5 Hz). <sup>13</sup>C NMR ([D<sub>8</sub>]-toluene, 223 K): 202.05 (<sup>1</sup>J<sub>CP</sub> = 101, <sup>2</sup>J<sub>CD</sub> = 1.55 Hz). <sup>2</sup>H NMR (CD<sub>2</sub>Cl<sub>2</sub>, 223 K): 1.15 (<sup>1</sup>J<sub>DP</sub> = 29.8 Hz). <sup>31</sup>P NMR (CD<sub>2</sub>Cl<sub>2</sub>, 223 K): −314.3 (<sup>1</sup>J<sub>PD</sub> = 29.9 Hz). <sup>13</sup>C NMR (CD<sub>2</sub>Cl<sub>2</sub>, 223 K): 201.5 (<sup>1</sup>J<sub>CP</sub> = 101, <sup>2</sup>J<sub>CD</sub> = 1.55 Hz). <sup>31</sup>P NMR ([D<sub>8</sub>]-THF, 193 K): −317.8 (<sup>1</sup>J<sub>PD</sub> = 29.9 Hz). IR (gas, cm<sup>−1</sup>): 3488/3454, 2596/2553/2522, 2012 (vs), 1620, 1423, 1193, 1065, 852, 724, 341.

### <sup>2</sup>HP<sup>13</sup>CO

<sup>31</sup>P NMR ([D<sub>8</sub>]-toluene, 223 K): −317.9 (<sup>1</sup>J<sub>PD</sub> = 29.5, <sup>1</sup>J<sub>PC</sub> = 101 Hz). <sup>31</sup>P NMR (CD<sub>2</sub>Cl<sub>2</sub>, 223 K): −314.6 (<sup>1</sup>J<sub>PD</sub> = 29.5, <sup>1</sup>J<sub>PC</sub> = 100 Hz). IR (gas, cm<sup>−1</sup>): 1964.

## NMR spectra of HPCO

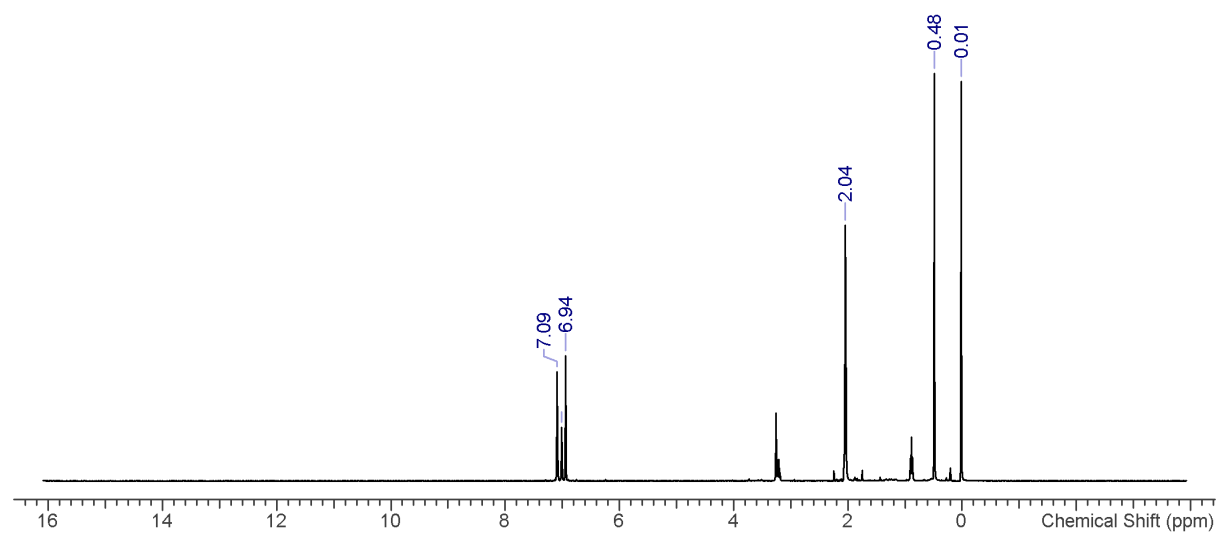

**Figure S1.**  $^1\text{H}$  NMR spectrum of HPCO in  $[\text{D}_8]$ -toluene.

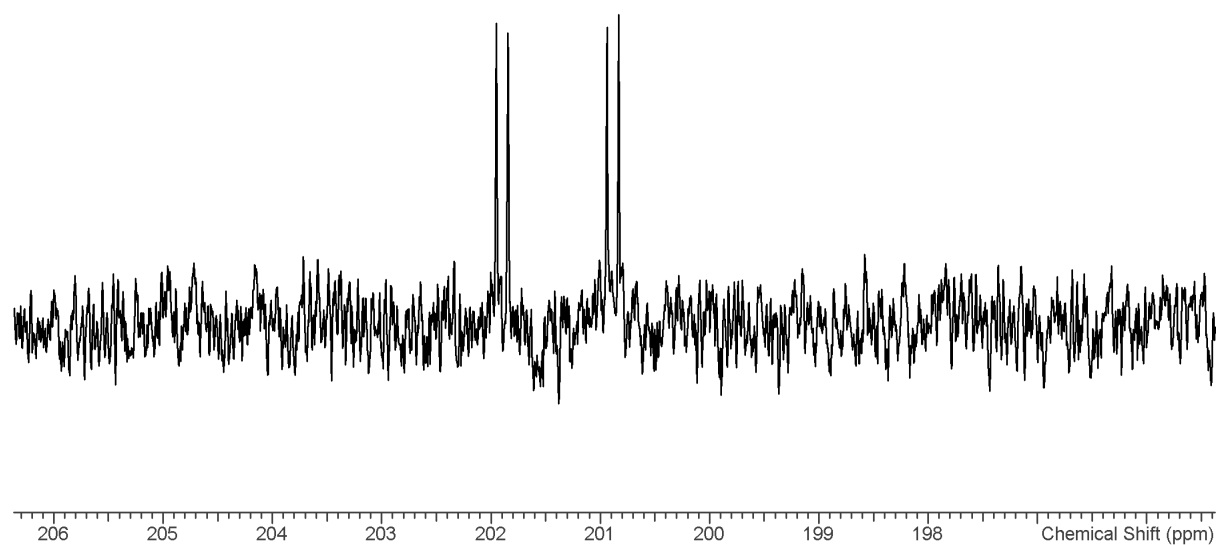

**Figure S2.**  $^{13}\text{C}$  NMR spectrum of HPCO in  $[\text{D}_8]$ -toluene.

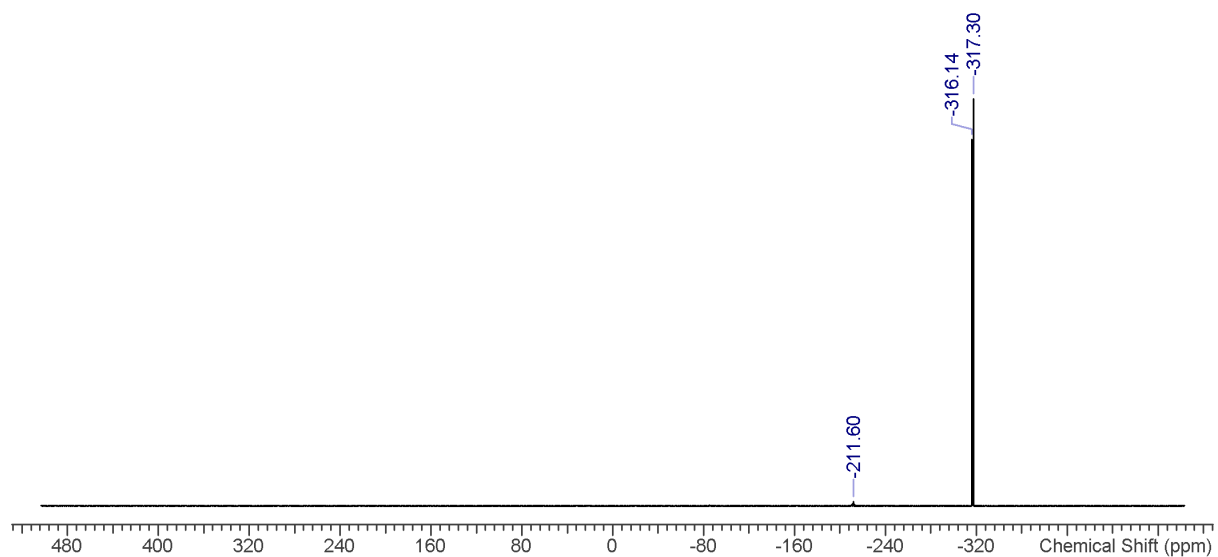

**Figure S3.**  $^{31}\text{P}$  NMR spectrum of HPCO in  $[\text{D}_8]$ -toluene.

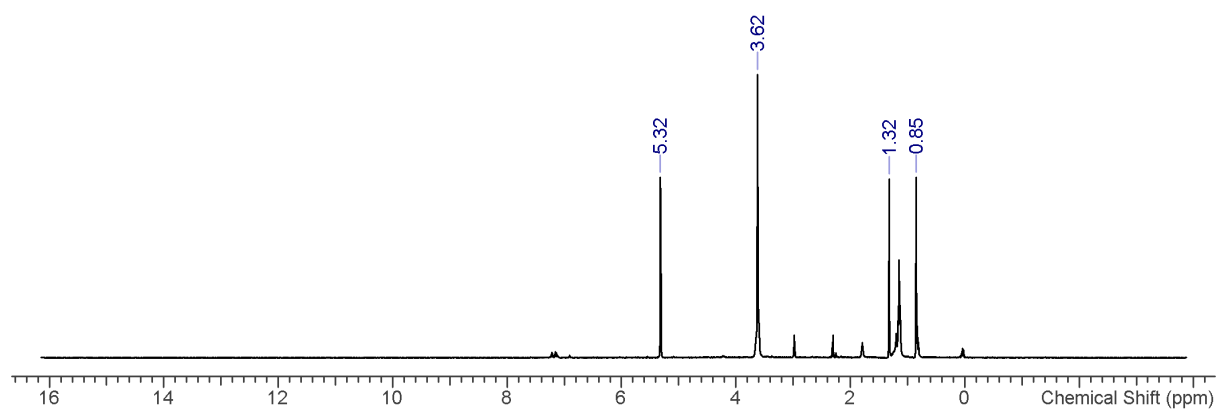

**Figure S4.**  $^1\text{H}$  NMR spectrum of HPCO in  $\text{CD}_2\text{Cl}_2$ .

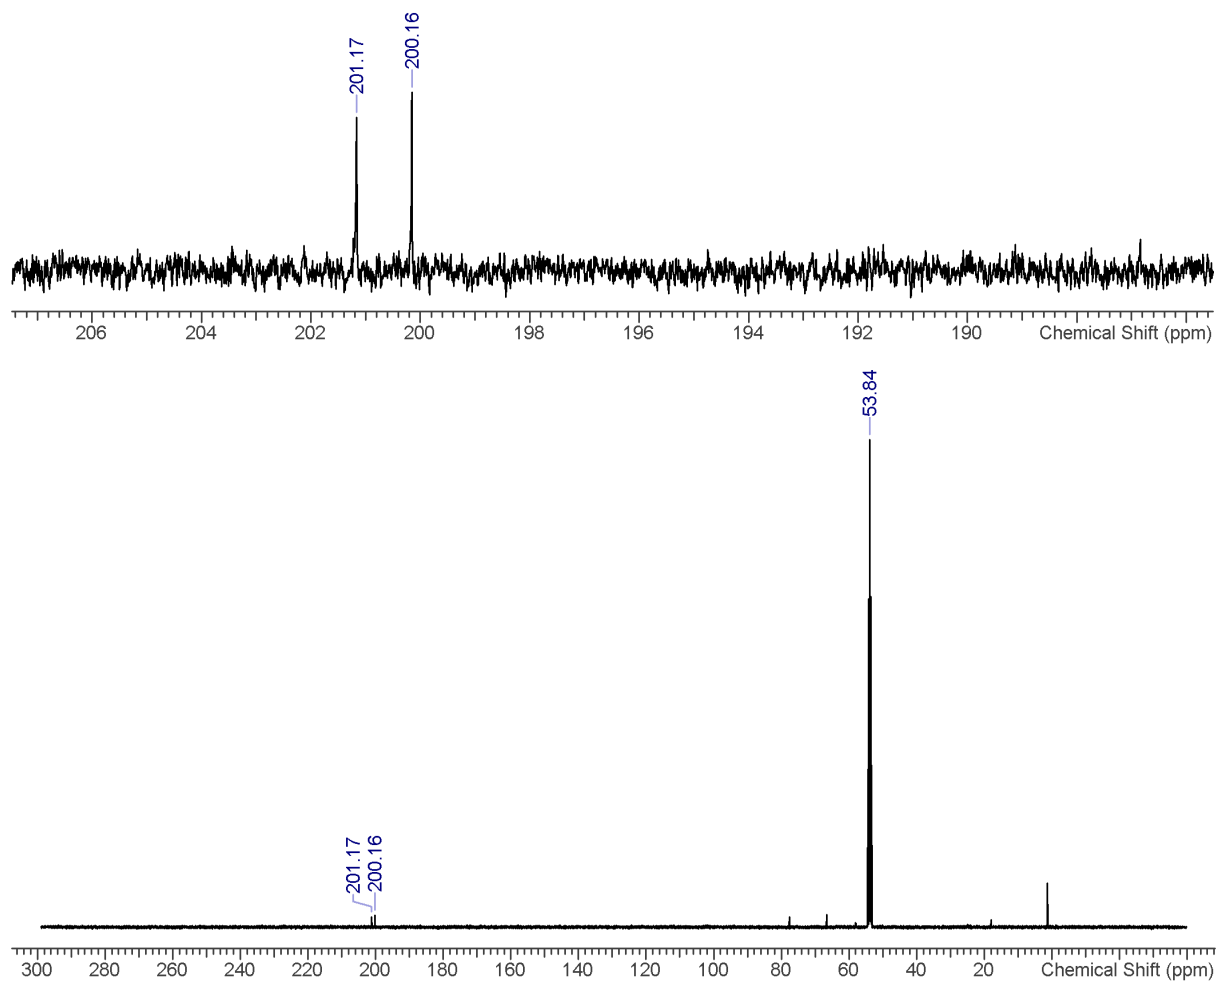

**Figure S5.**  $^{13}\text{C}$  NMR spectrum of HPCO in  $\text{CD}_2\text{Cl}_2$ .

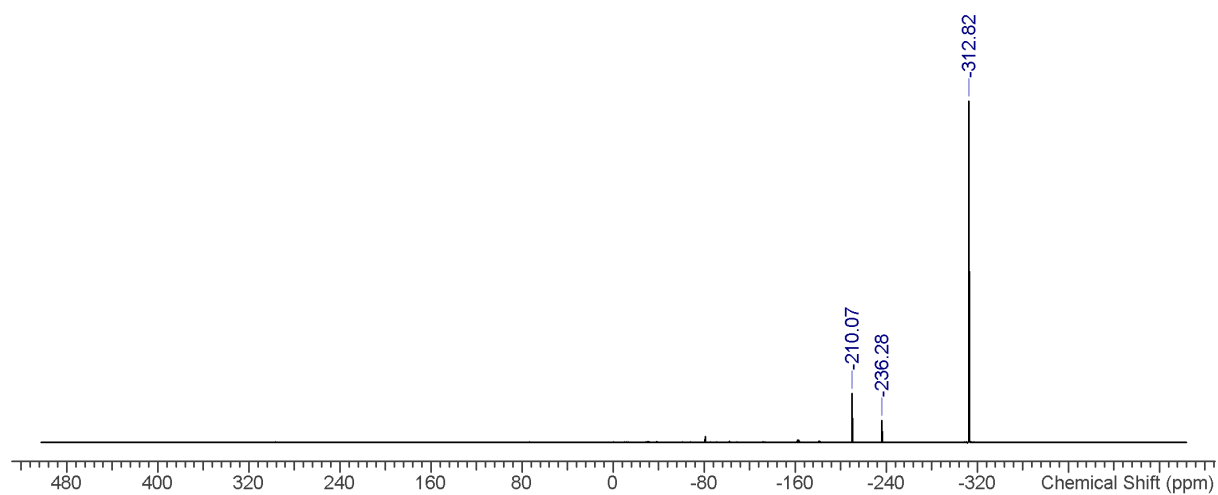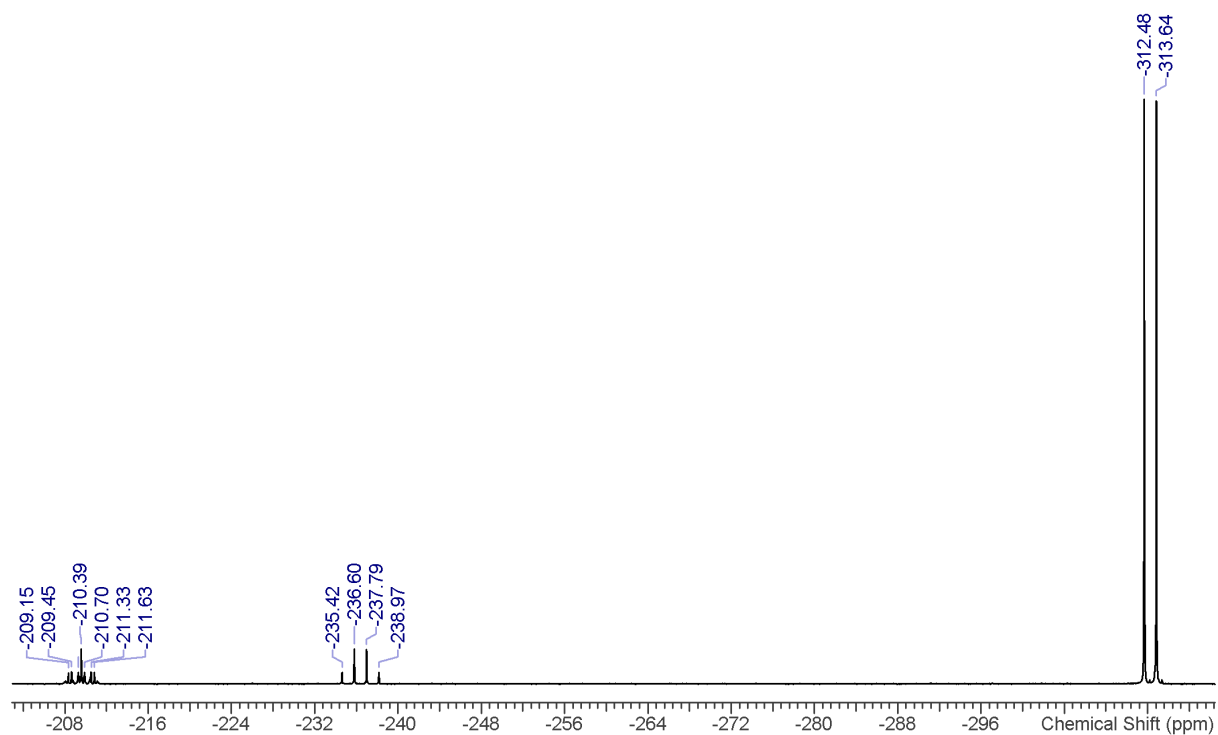

**Figure S6.** <sup>1</sup>H NMR spectrum of HPCO in CD<sub>2</sub>Cl<sub>2</sub>.



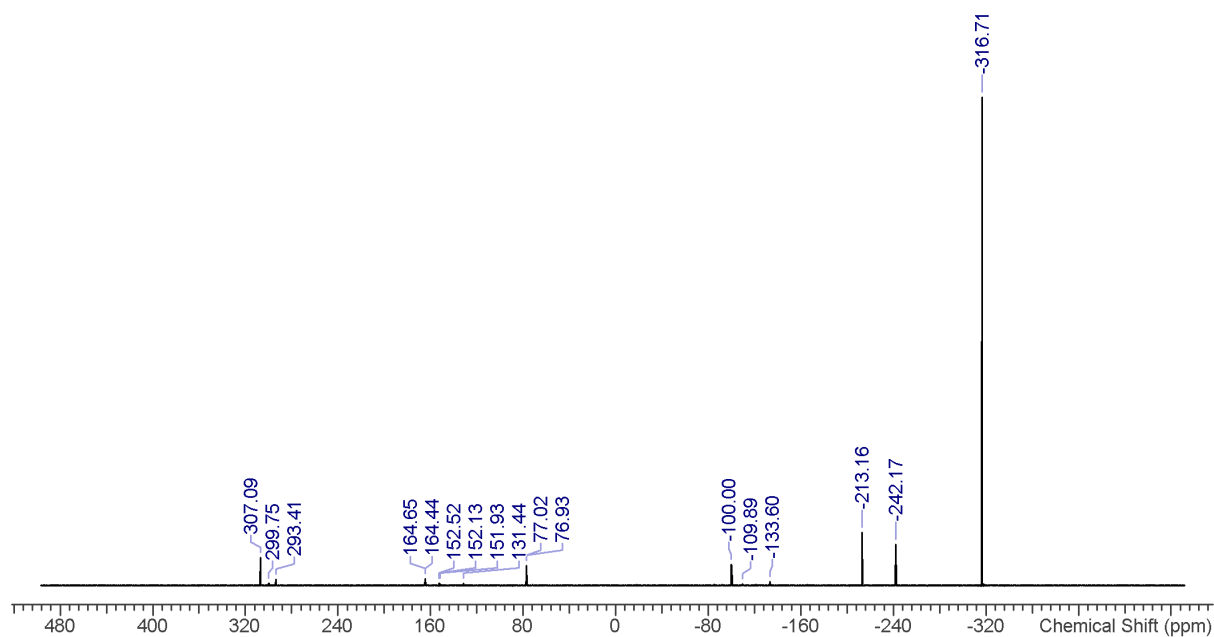

**Figure S7.**  $^{31}\text{P}$  NMR spectrum of HPCO in  $[\text{D}_8]\text{-THF}$  of the purest sample of HPCO in THF that could be obtained.

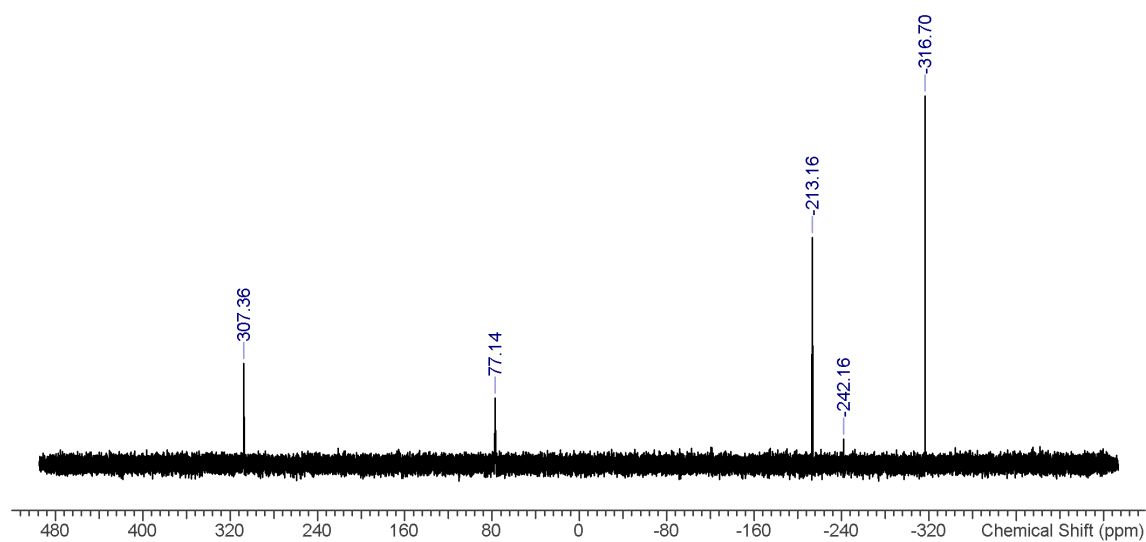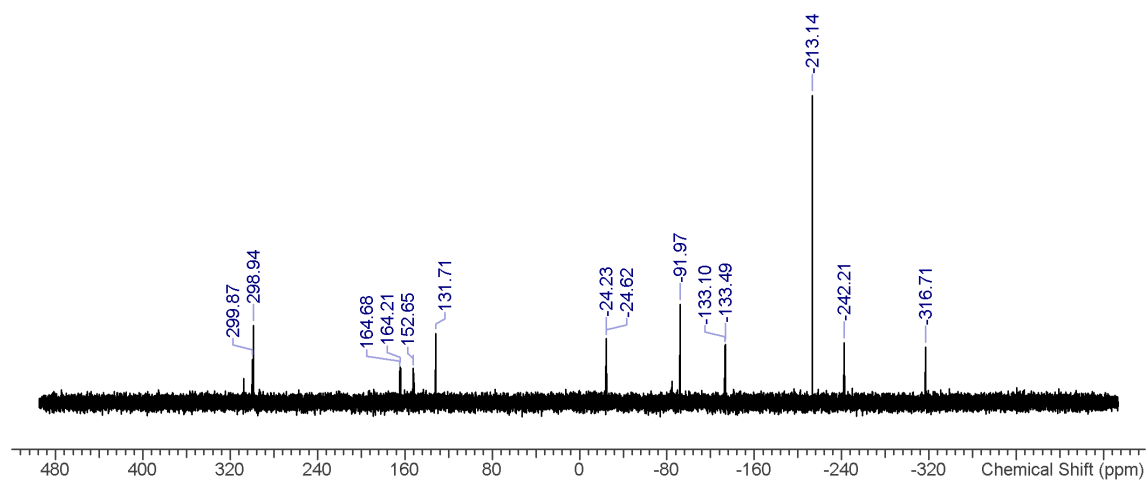

**Figure S8.**  $^{31}\text{P}$  NMR spectrum of a dilute solution of HPCO in  $[\text{D}_8]\text{-THF}$  (500 MHz spectrometer). Top: only HPCO and  $(\text{HPCO})_2$  present in solution. Bottom: tetramer and other decomposition products present in solution.

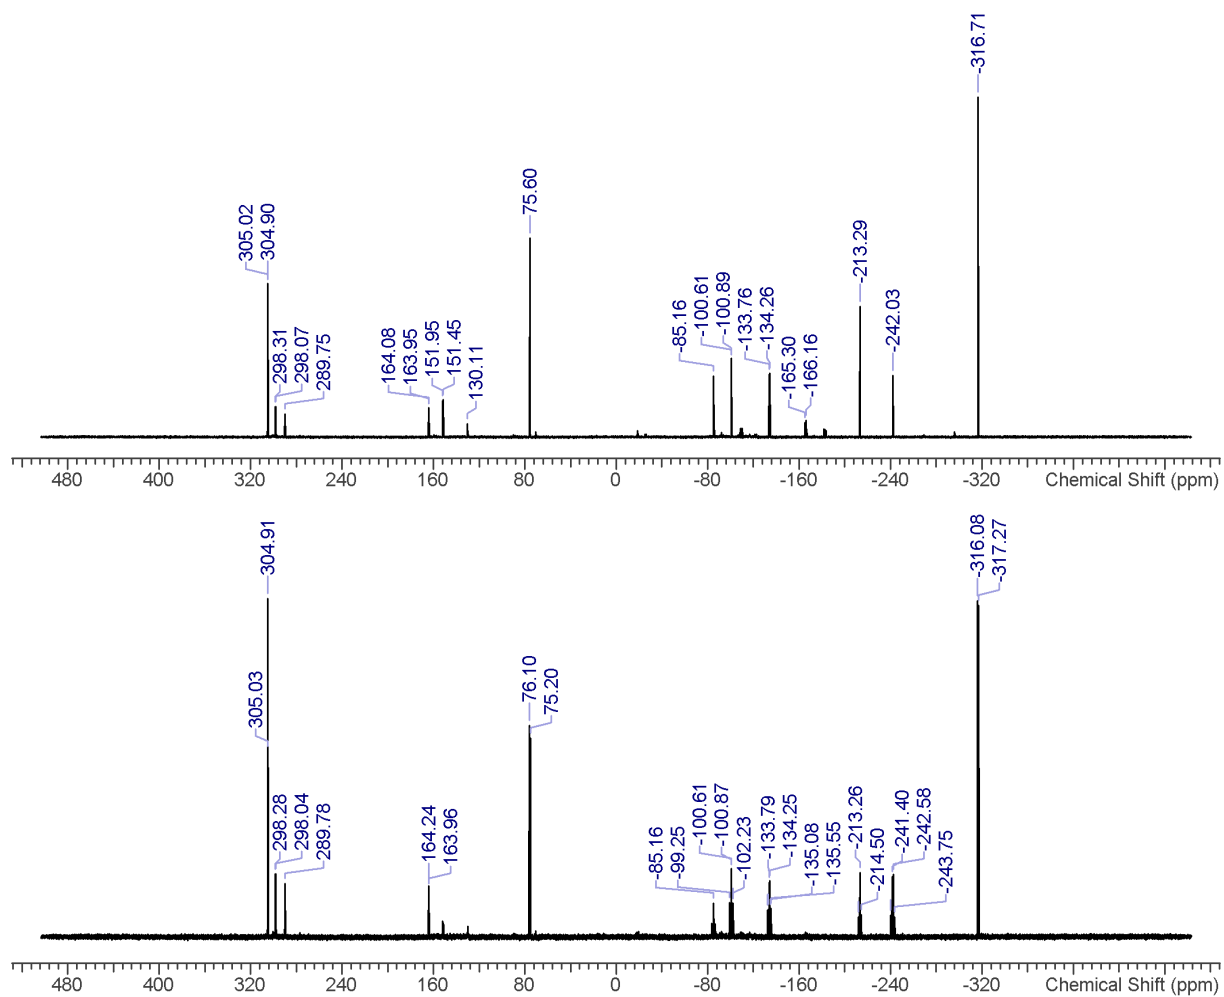

**Figure S9.**  $^{31}\text{P}$  NMR spectrum of a concentrated solution of HPCO in  $[\text{D}_8]\text{-THF}$ .

## NMR spectra of DPCO

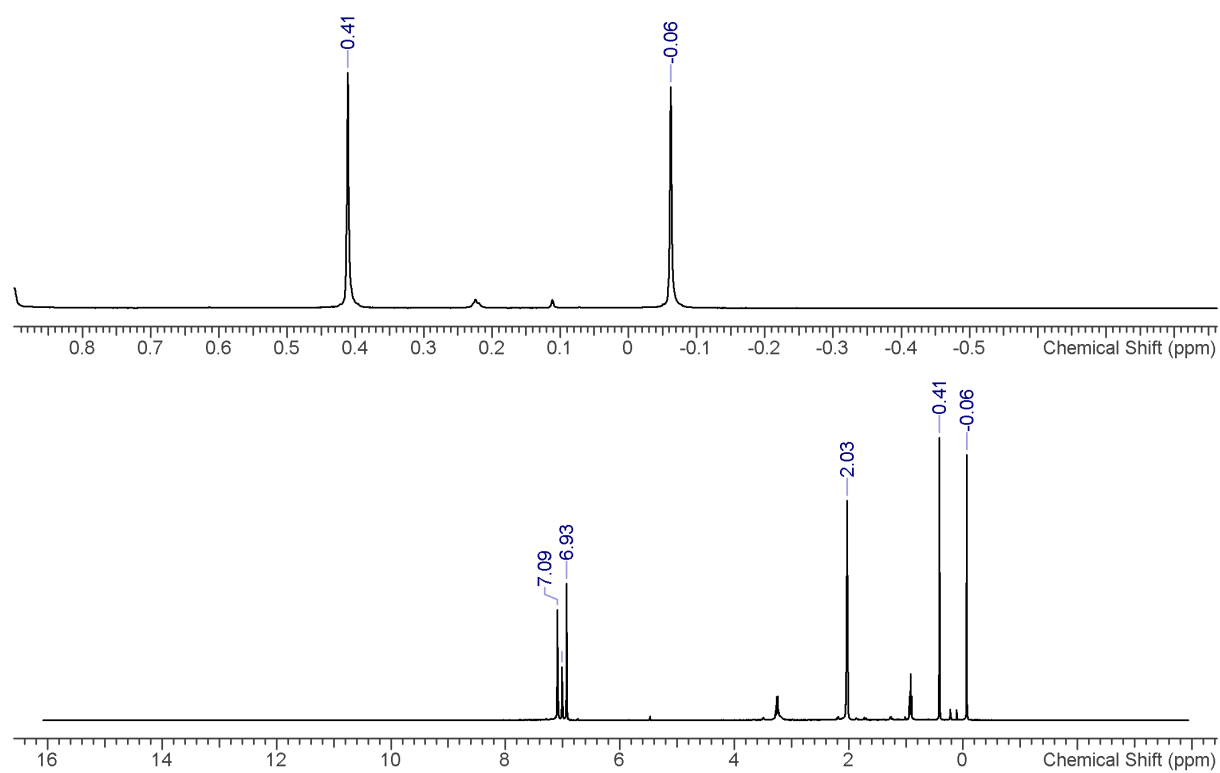

**Figure S10.**  $^1\text{H}$  NMR spectrum of a mixture of HPCO and DPCO in  $[\text{D}_8]$ -toluene at 223 K.

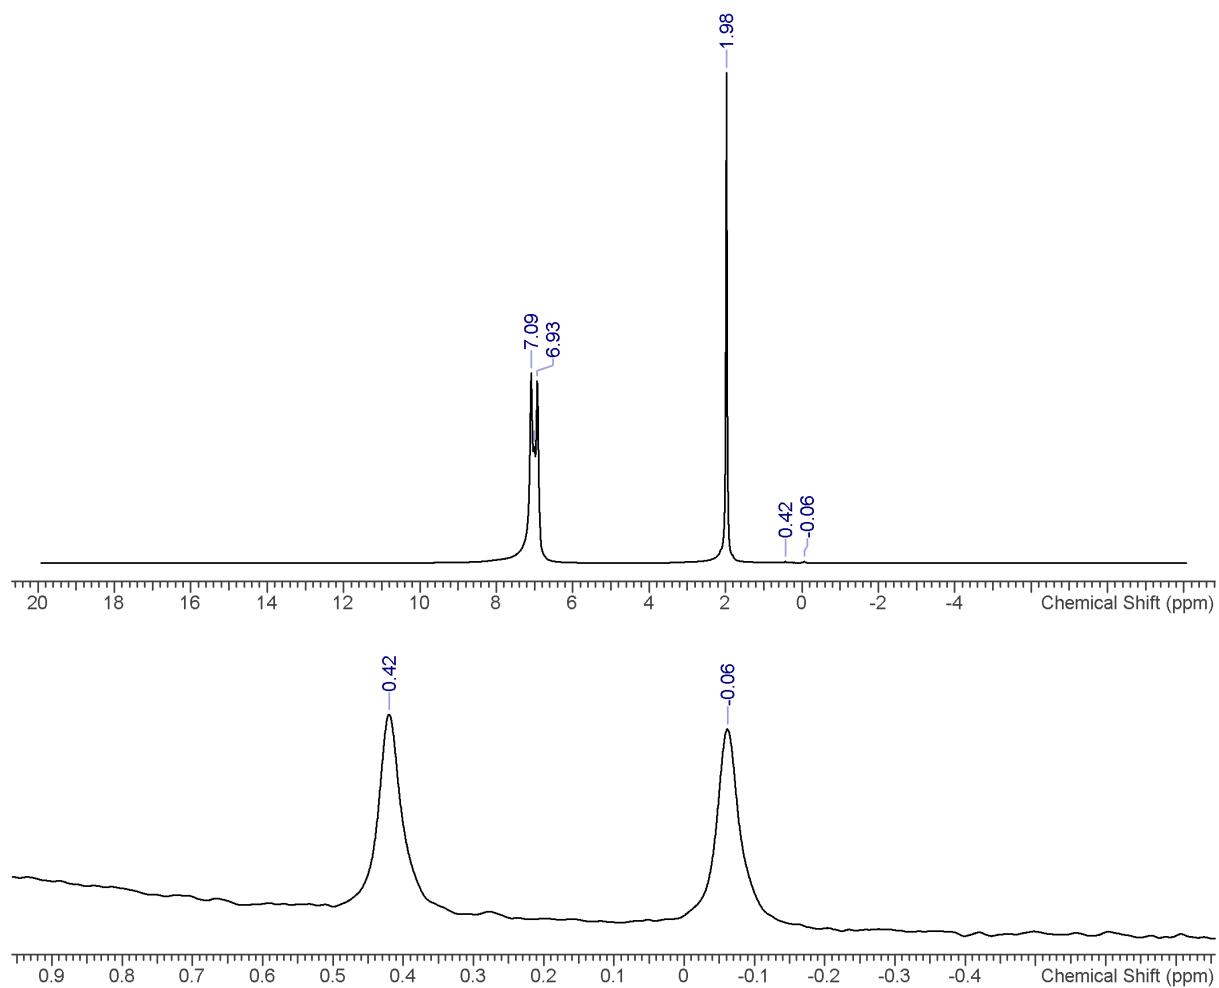

**Figure S11.**  $^2\text{H}$  NMR spectrum of a mixture of HPCO and DPCO in  $[\text{D}_8]$ -toluene at 223 K.

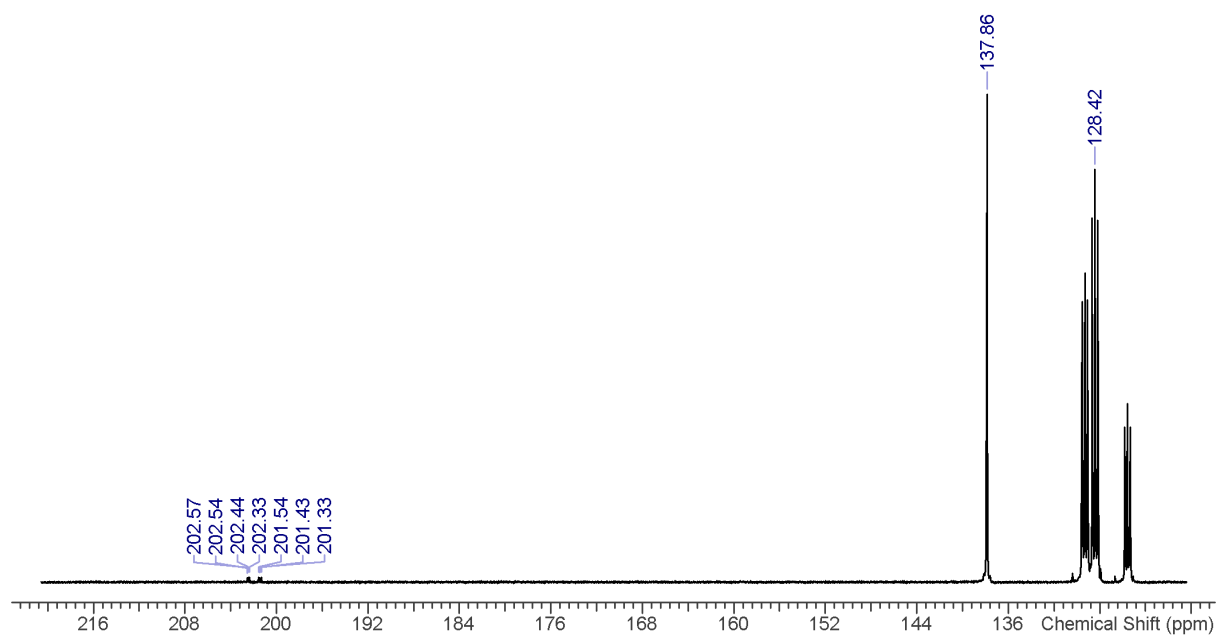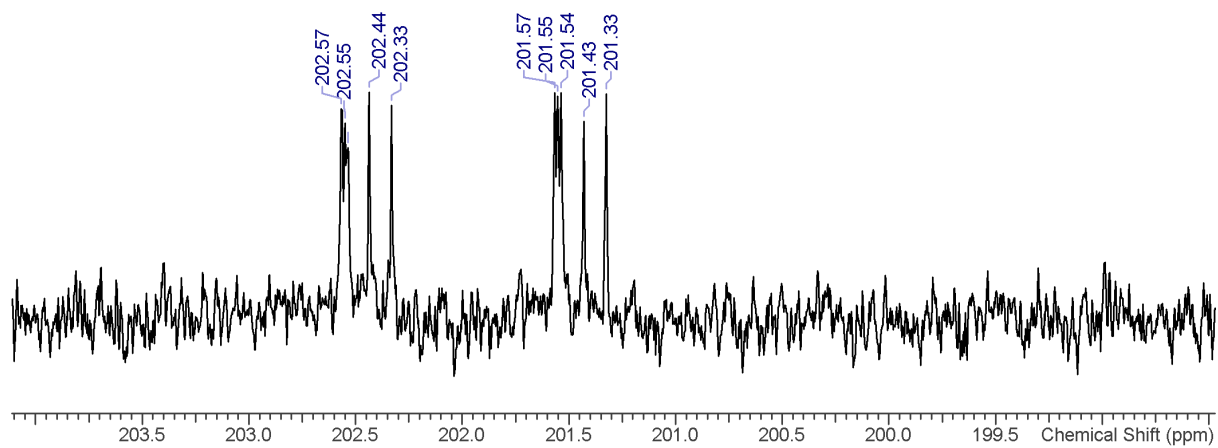

**Figure S12.**  $^{13}\text{C}$  NMR spectrum of a mixture of HPCO and DPCO in  $[\text{D}_8]$ -toluene.

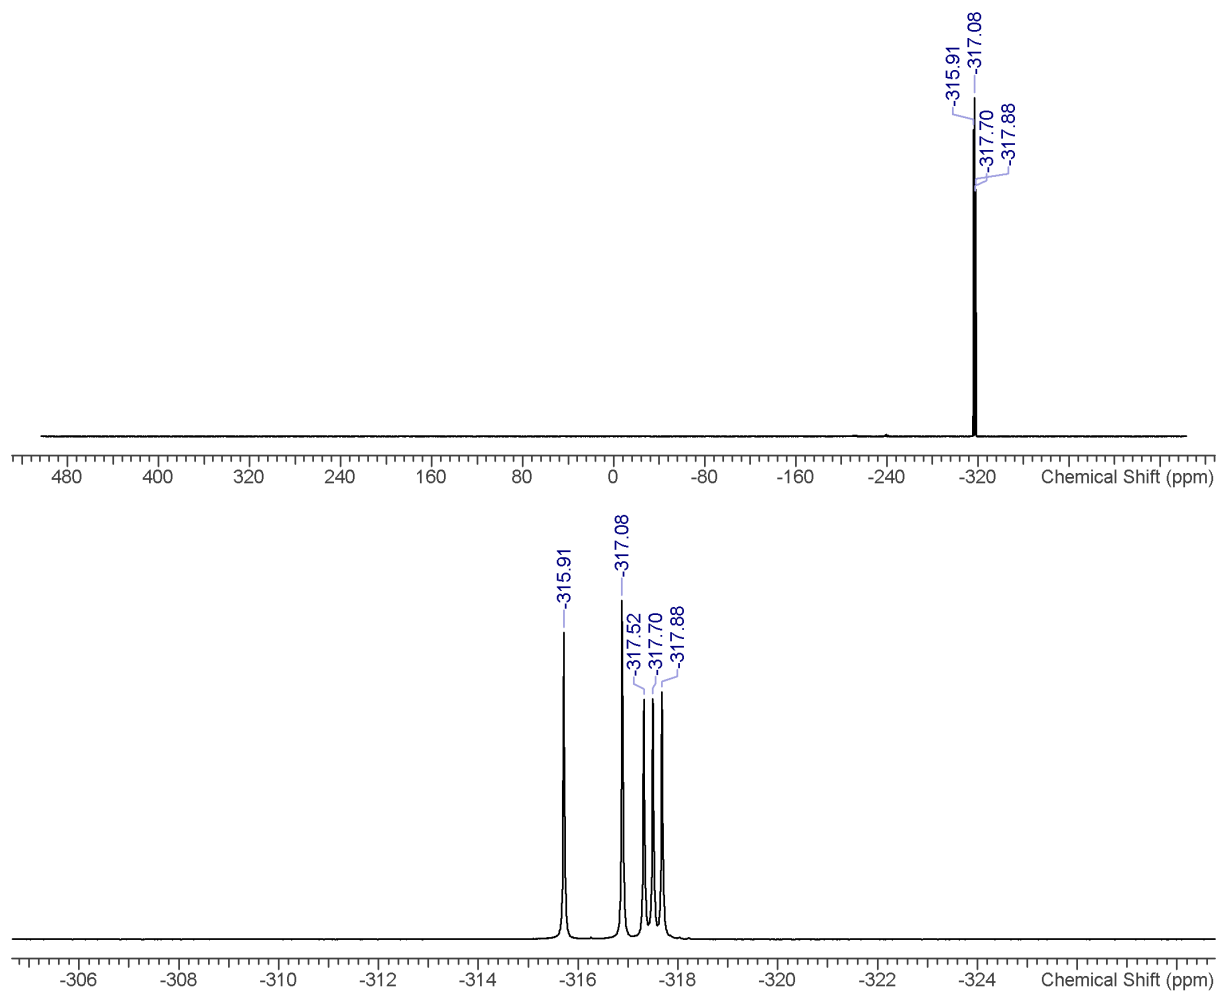

**Figure S13.**  $^{31}\text{P}$  NMR spectrum of a mixture of HPCO and DPCO in  $[\text{D}_8]$ -toluene.

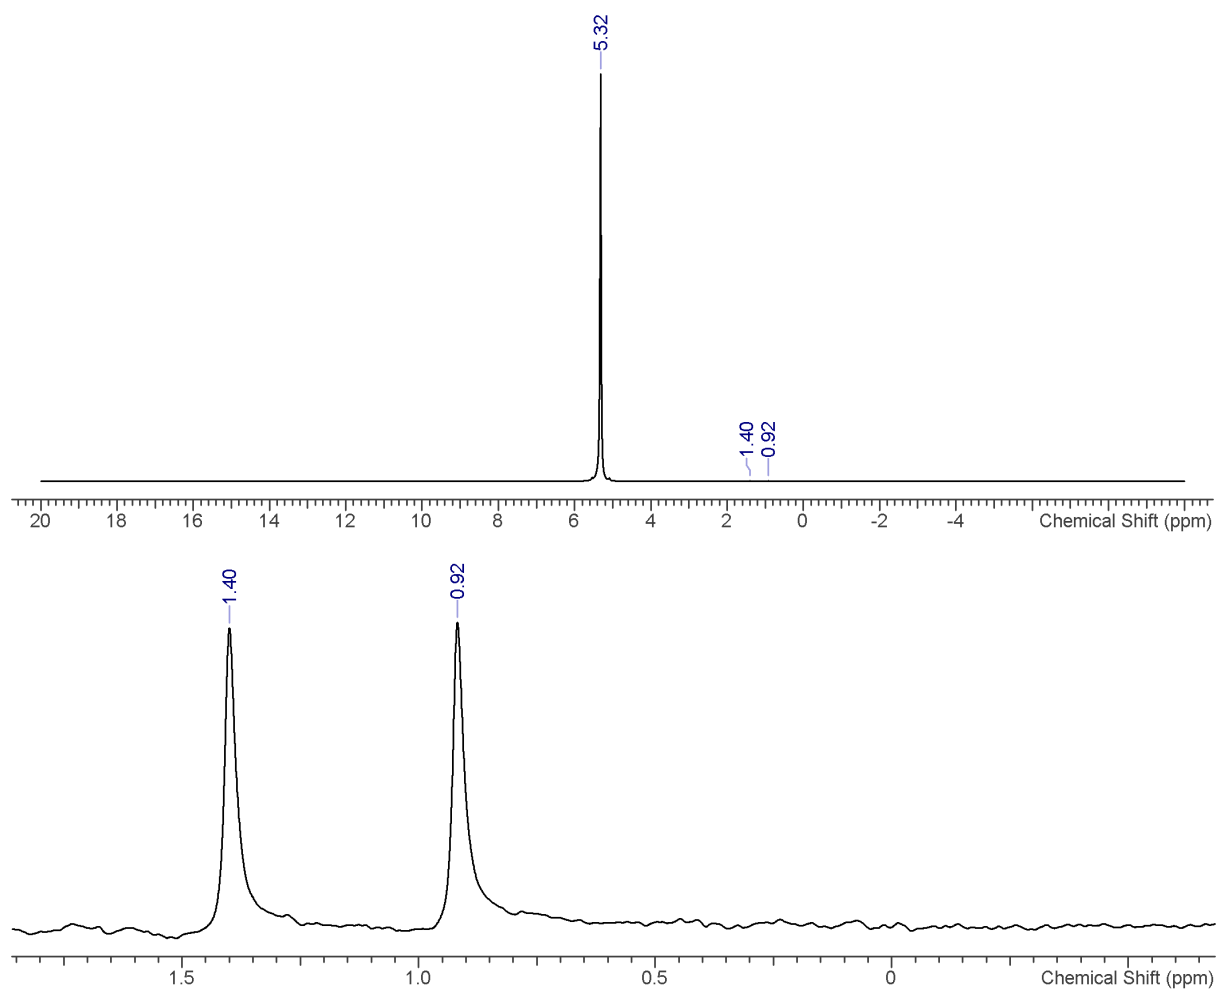

**Figure S14.**  $^2\text{H}$  NMR spectrum of a mixture of HPCO and DPCO in  $\text{CD}_2\text{Cl}_2$ .

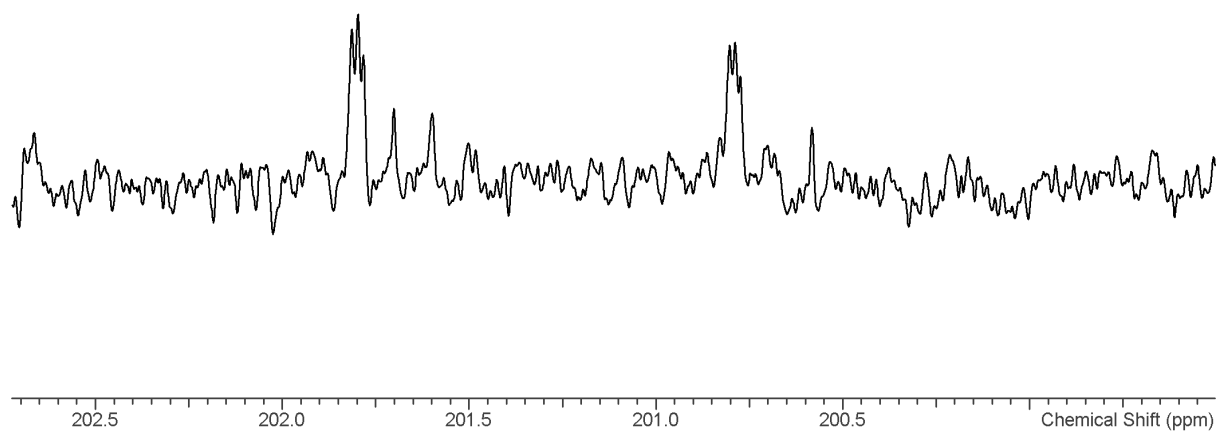

**Figure S15.**  $^{13}\text{C}$  NMR spectrum of a mixture of HPCO and DPCO in  $\text{CD}_2\text{Cl}_2$ .

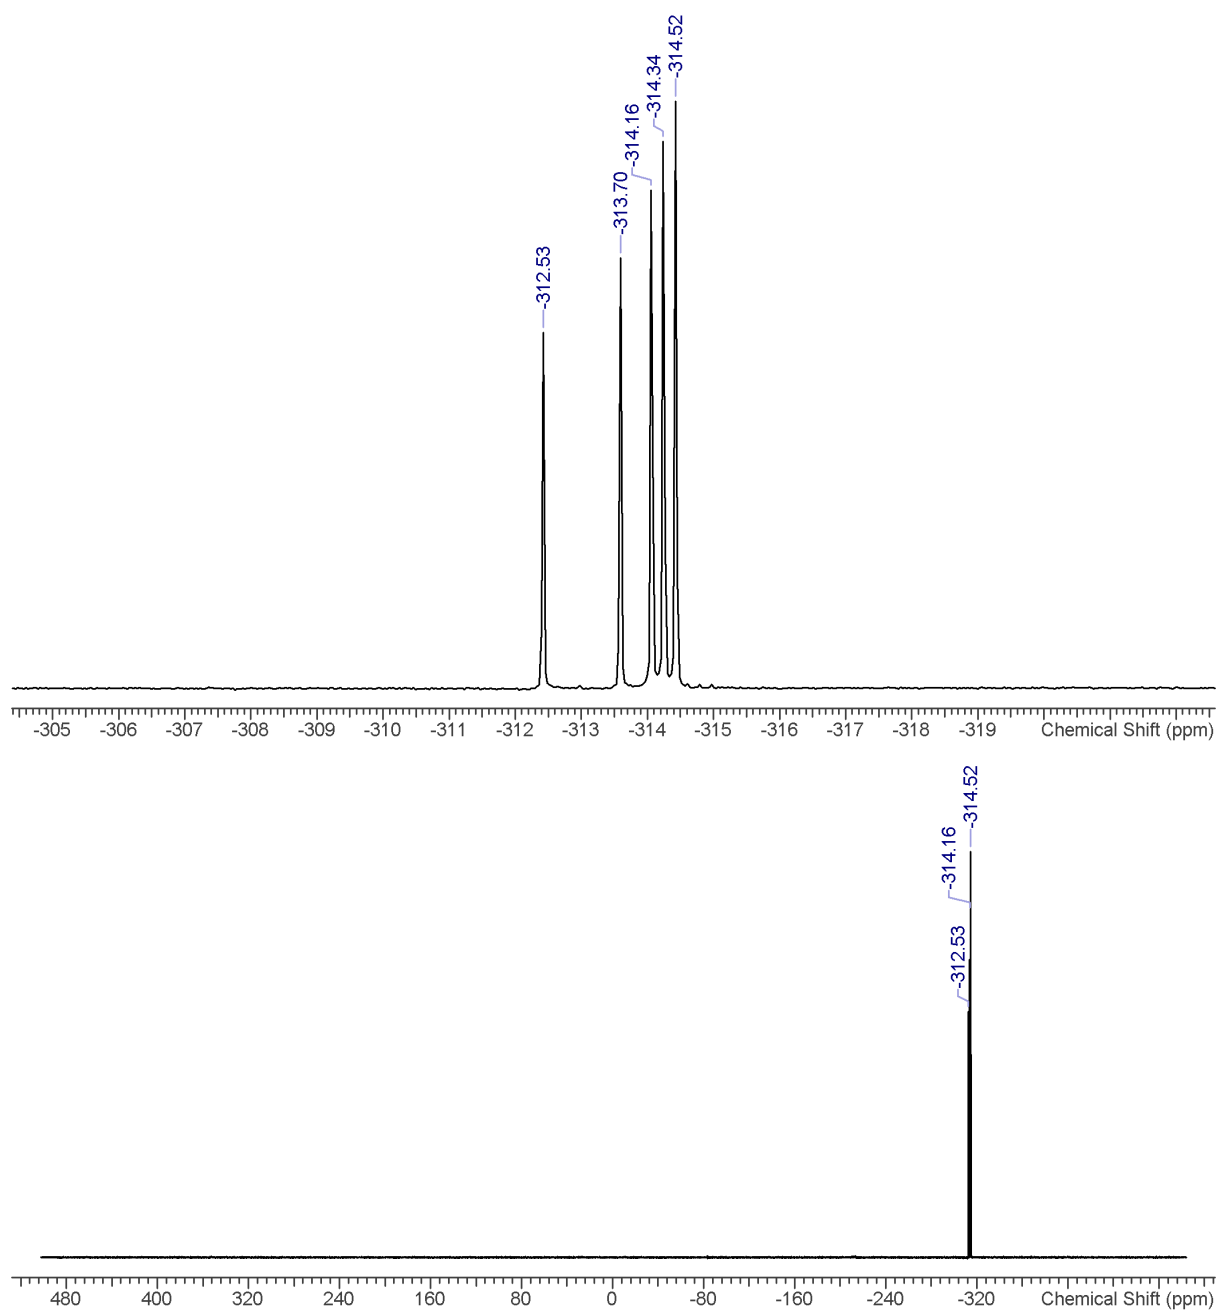

**Figure S16.**  $^{31}\text{P}$  NMR spectrum of a mixture of HPCO and DPCO in  $\text{CD}_2\text{Cl}_2$ .



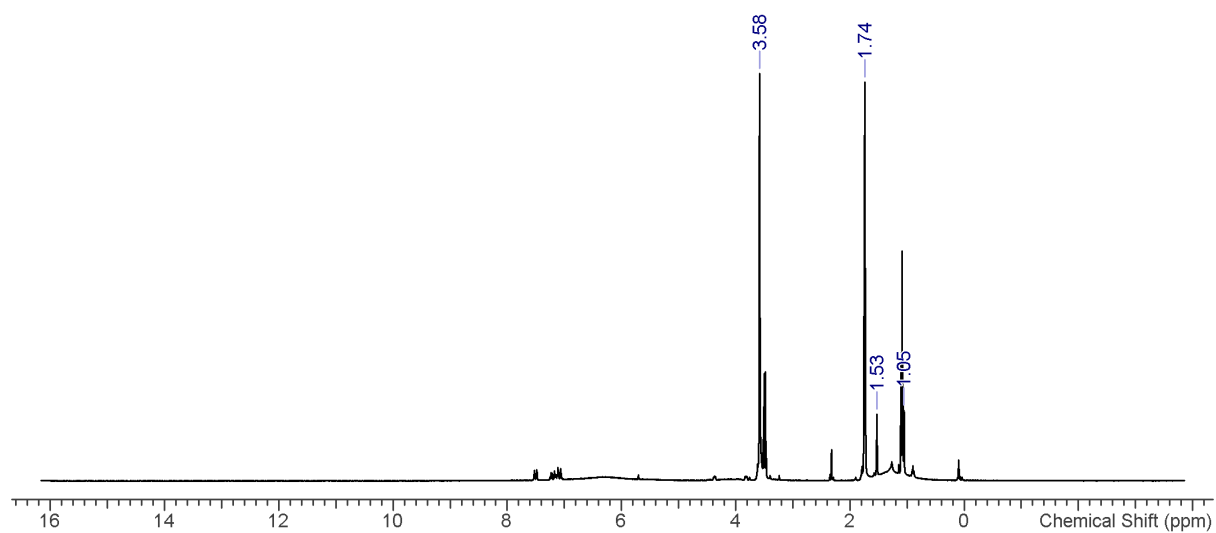

**Figure S17.**  $^1\text{H}$  NMR spectrum of a mixture of HPCO and DPCO in  $[\text{D}_8]\text{-THF}$  at 193 K.

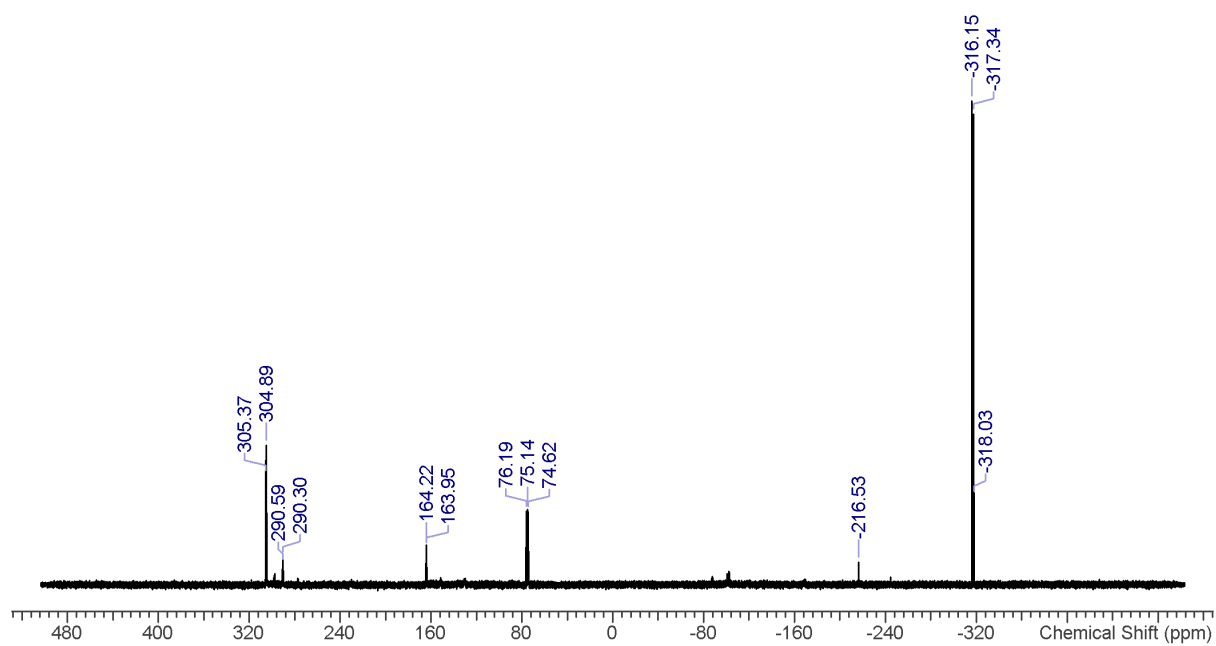

**Figure S18.**  $^{31}\text{P}$  NMR spectrum of a mixture of HPCO and DPCO in  $[\text{D}_8]\text{-THF}$  at 193 K.

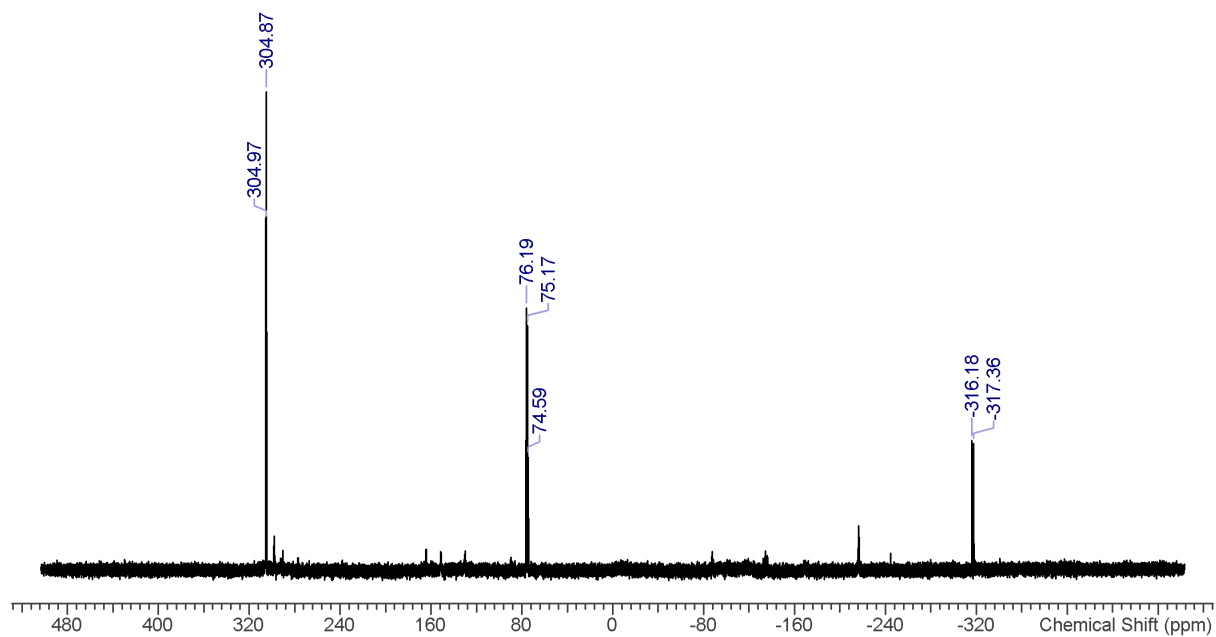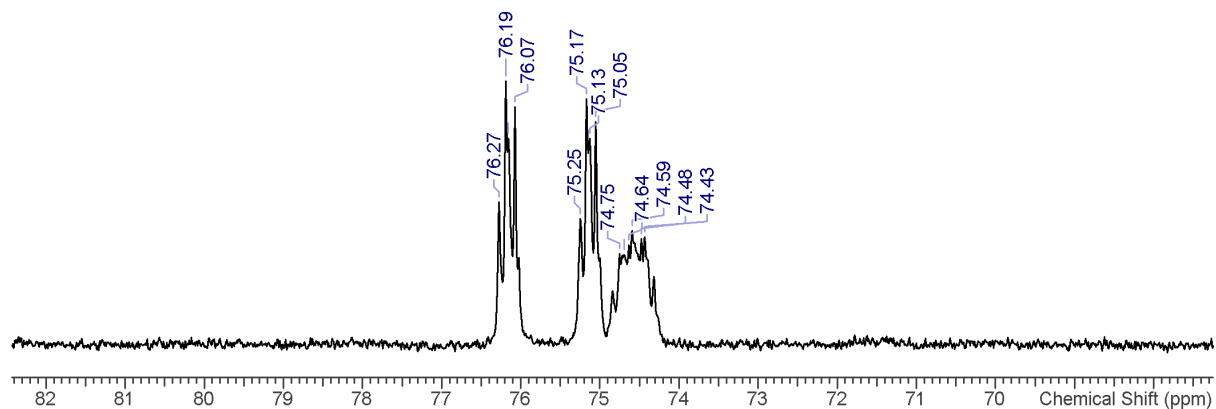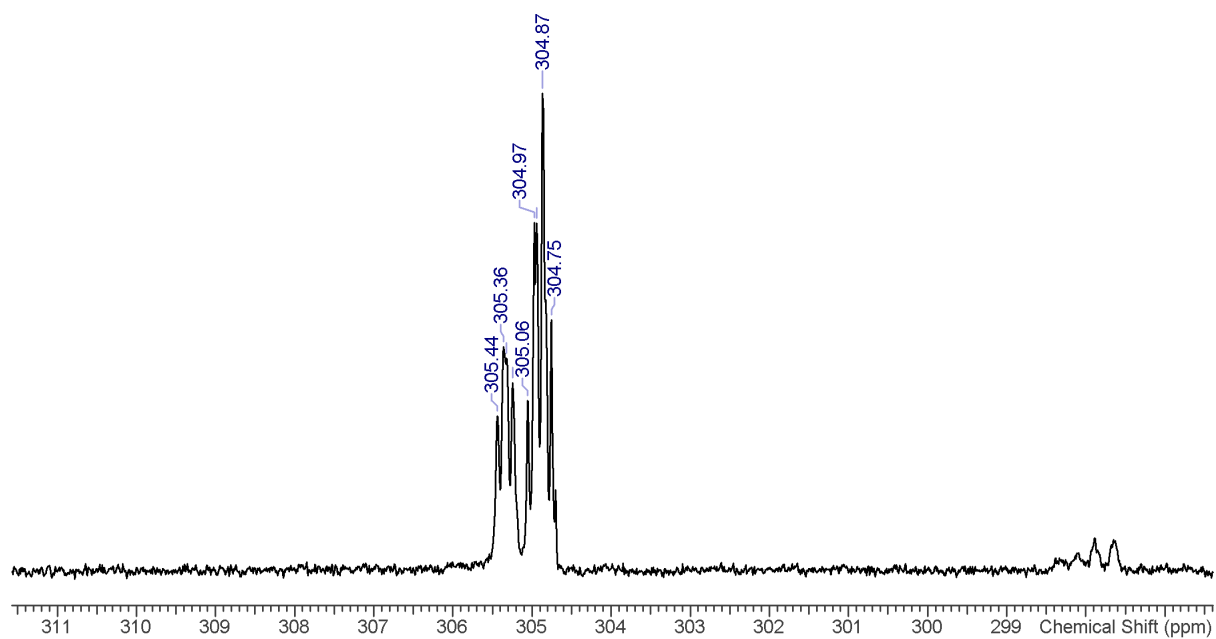

**Figure S19.**  $^1\text{H}$  NMR spectrum of a mixture of HPCO and DPCO in  $[\text{D}_8]$ -THF after 2 hours at 193 K.

## Gas-phase IR spectra

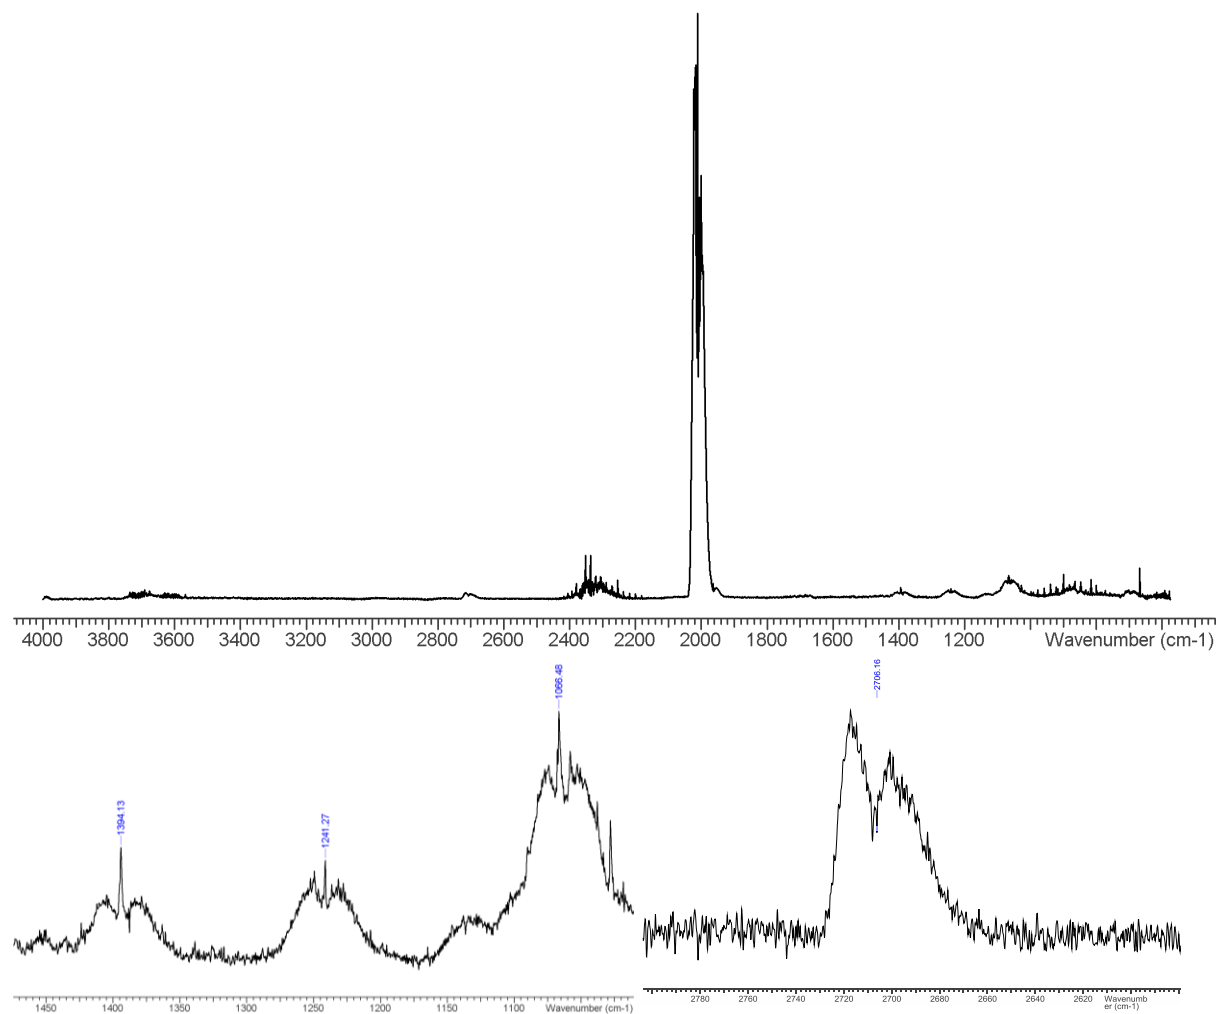

**Figure S20.** Processed gas-phase IR spectrum of HPCO (top) and magnified details (bottom).

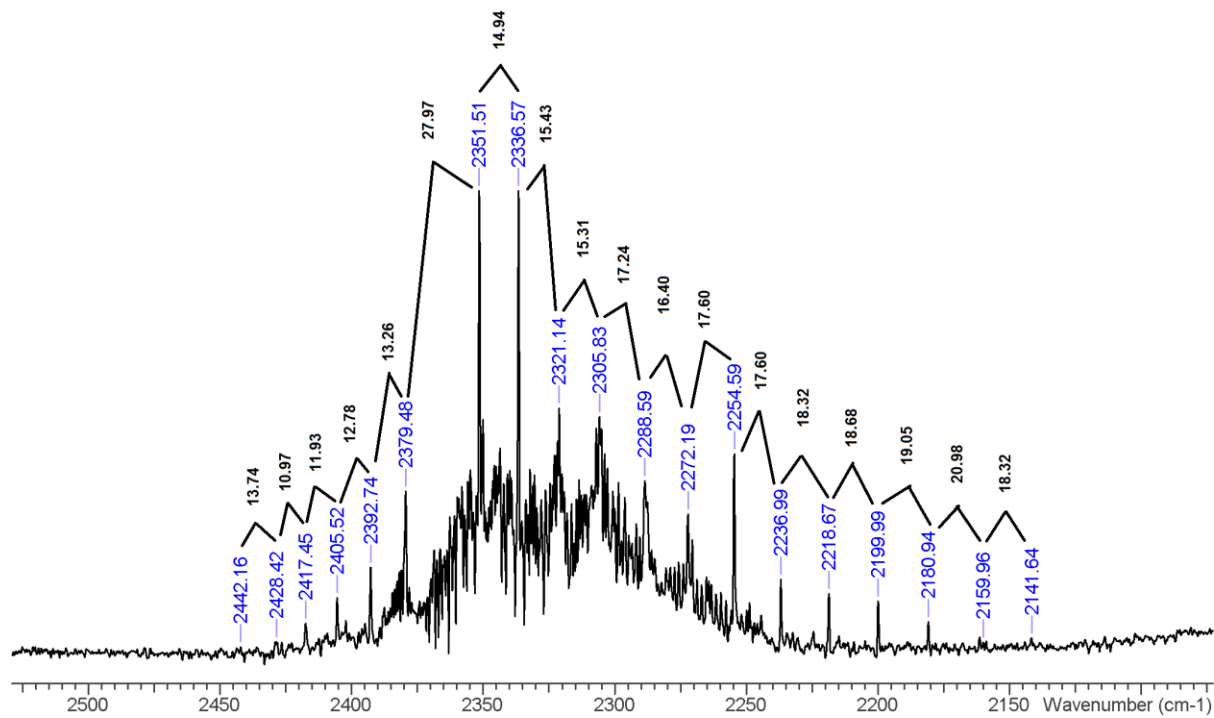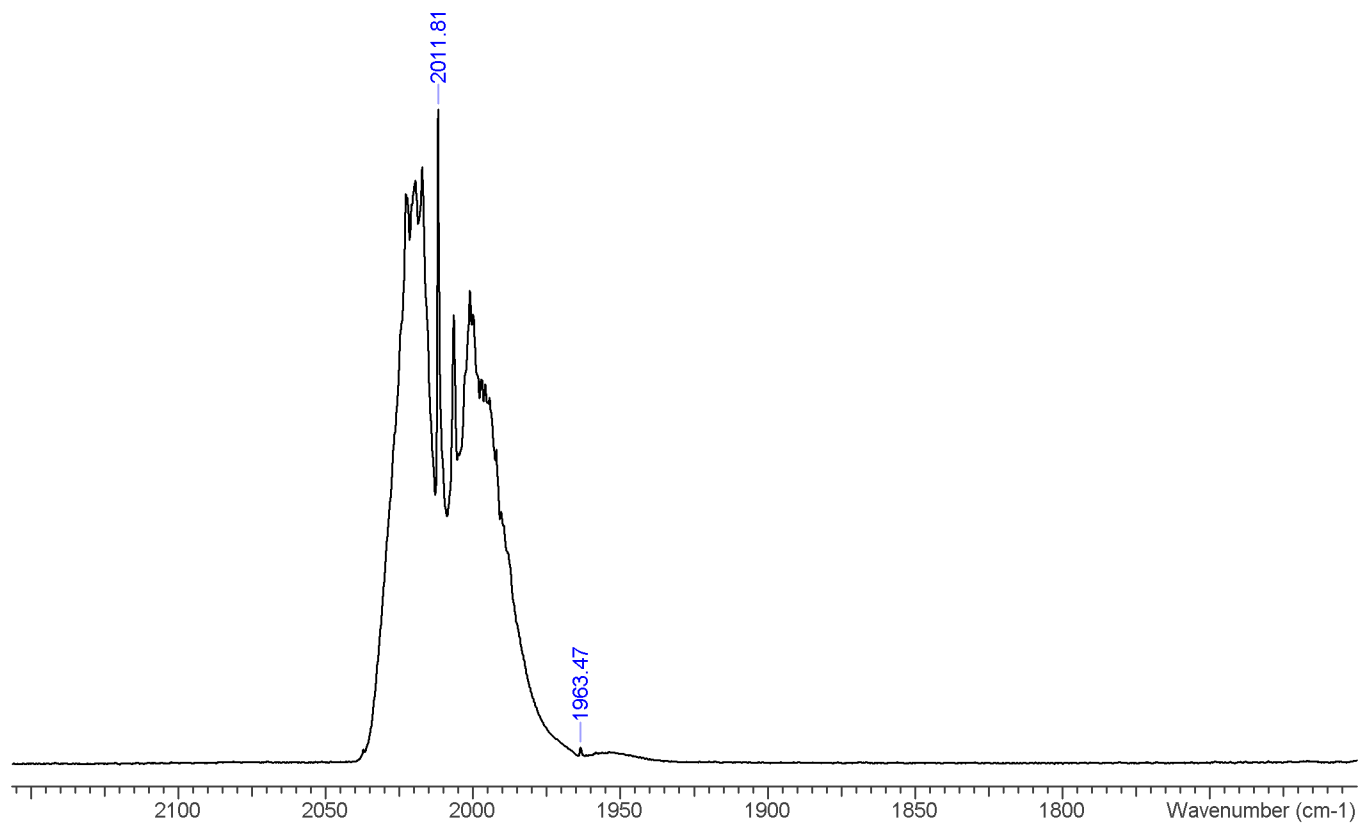

**Figure S21.** Processed gas-phase IR spectrum of HPCO,  $\nu_{\text{PH}}$  (top) and  $\nu_{\text{PH}}$  (bottom) range.

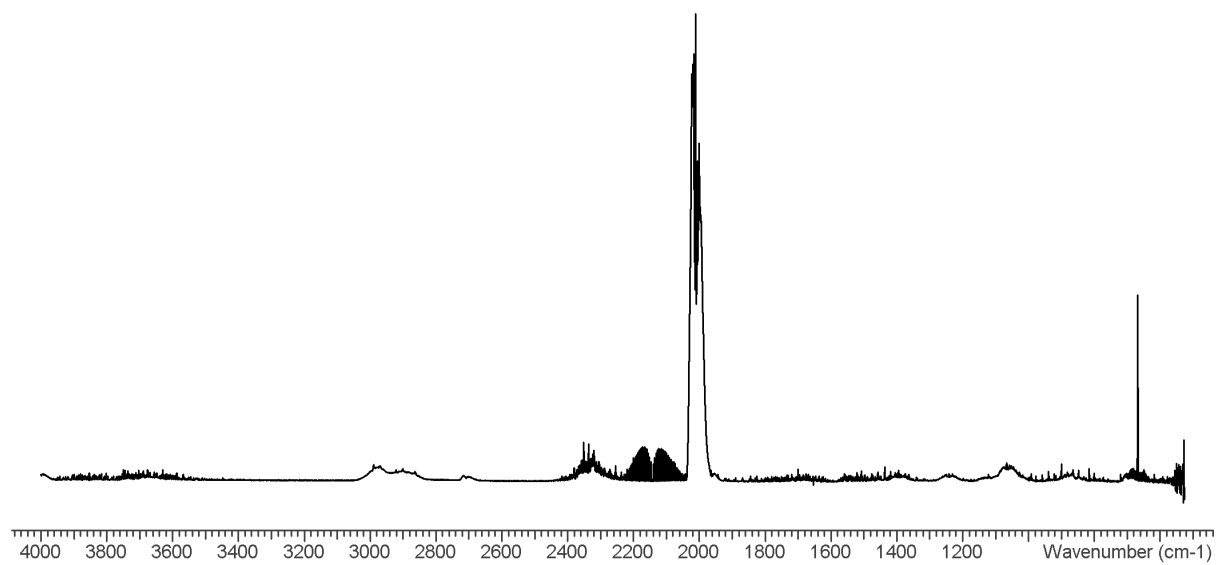

**Figure S22.** Raw gas-phase IR spectrum of HPCO.

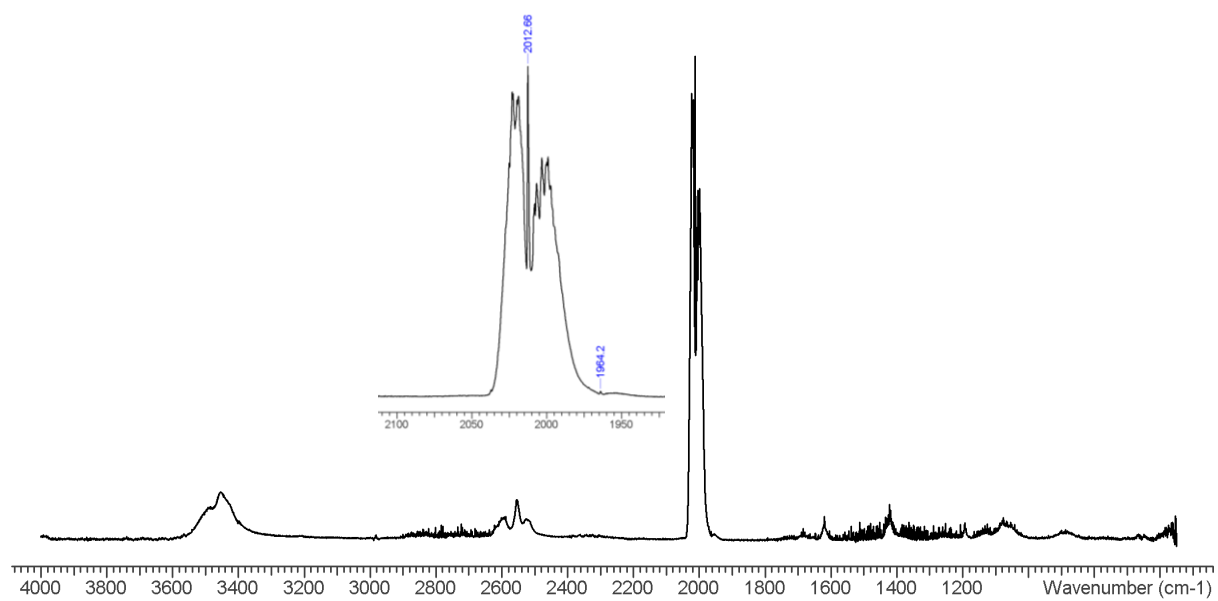

**Figure S23.** Processed gas-phase IR spectrum of DPCO.

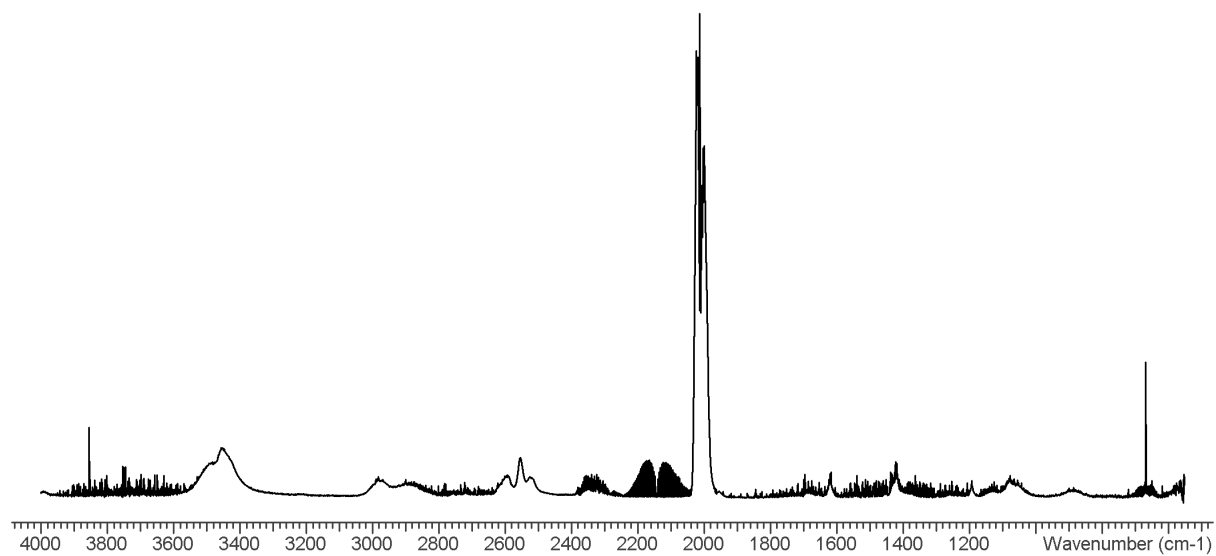

**Figure S24.** Raw gas-phase IR spectrum of DPCO.

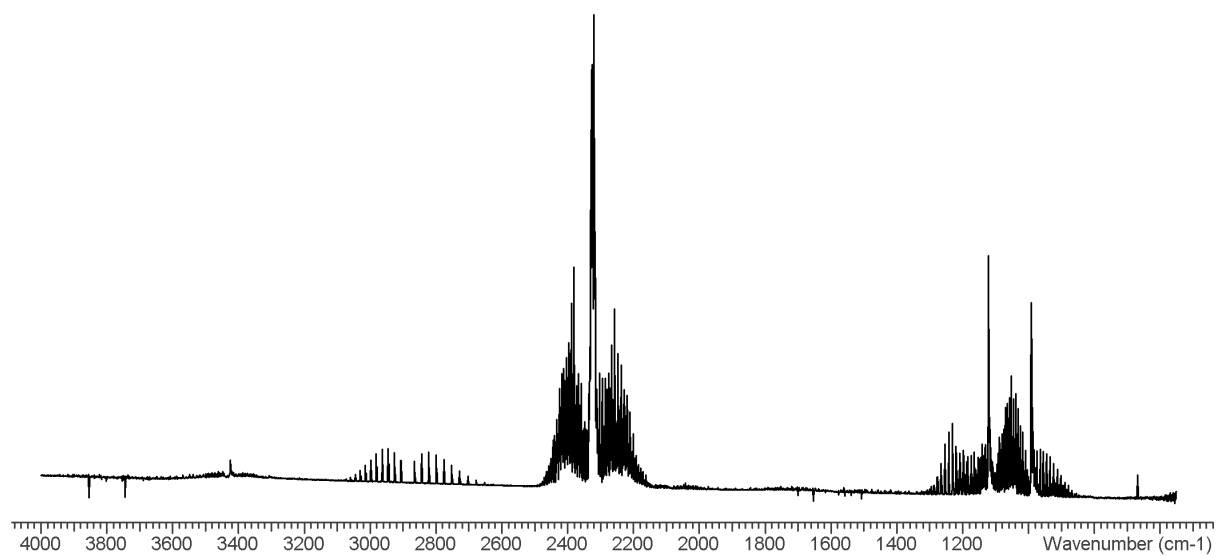

**Figure S25.** Raw gas-phase IR spectrum of PH<sub>3</sub>.

## 1.2 [D<sub>1</sub>]-stearic acid

Stearic acid (2100 mg, 7.34 mmol) was dissolved in THF (40 ml). To the colourless solution, Me<sub>3</sub>SiCl (900 mg, 8.28 mmol) were added via syringe at ambient temperature. after 5 minutes of stirring, NEt<sub>3</sub> (1200 mg, 11.88 mmol) was added via syringe, immediately forming a colourless precipitate. After stirring overnight, all volatiles were removed in vacuo, leaving behind a colourless precipitate. To the residue 50 ml *n*-hexane were added and the mixture was filtered. The colourless solution was evaporated in vacuo, affording a colourless solid (CH<sub>3</sub>-(CH<sub>2</sub>)<sub>16</sub>-C(O)OSiMe<sub>3</sub>, mp. 40-45 °C) in quantitative yield.

CH<sub>3</sub>-(CH<sub>2</sub>)<sub>16</sub>-C(O)OSiMe<sub>3</sub> (2610 mg, 7.32 mmol) was dissolved in THF and 1 ml of D<sub>2</sub>O was added via syringe at ambient temperature. The mixture was stirred for three hours, then all volatiles were removed in vacuo, affording colourless [D<sub>1</sub>]-stearic acid (CH<sub>3</sub>-(CH<sub>2</sub>)<sub>16</sub>-C(O)OD) in quantitative yield.

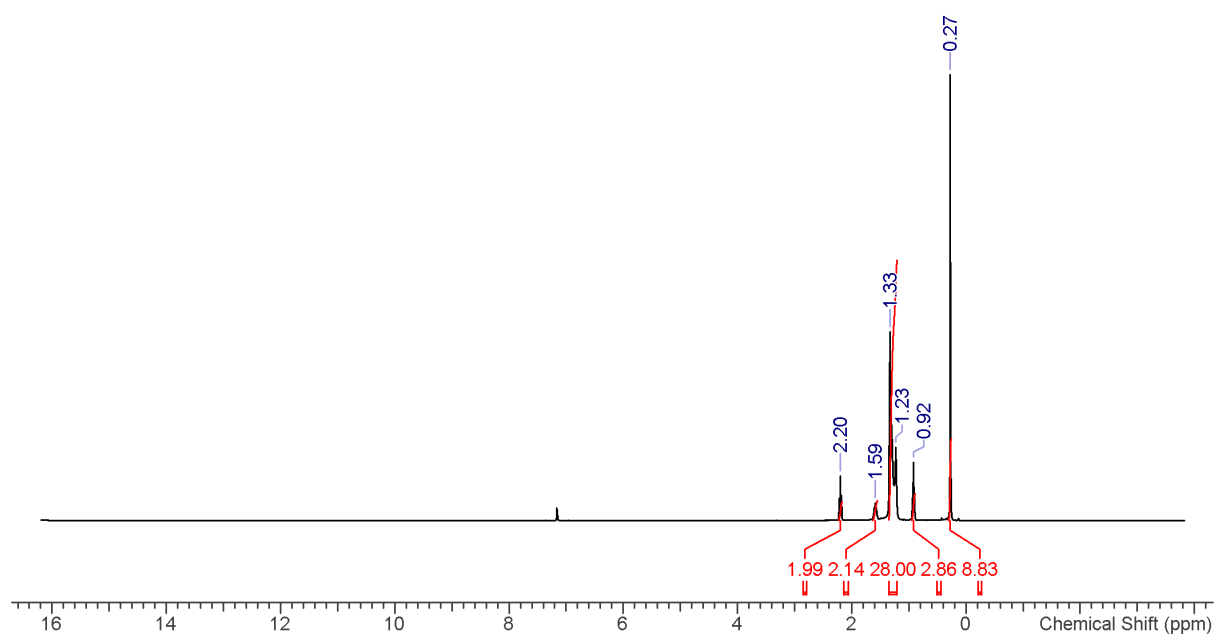

**Figure S26.** <sup>1</sup>H NMR spectrum of CH<sub>3</sub>-(CH<sub>2</sub>)<sub>16</sub>-C(O)OSiMe<sub>3</sub> in C<sub>6</sub>D<sub>6</sub> at 298 K.

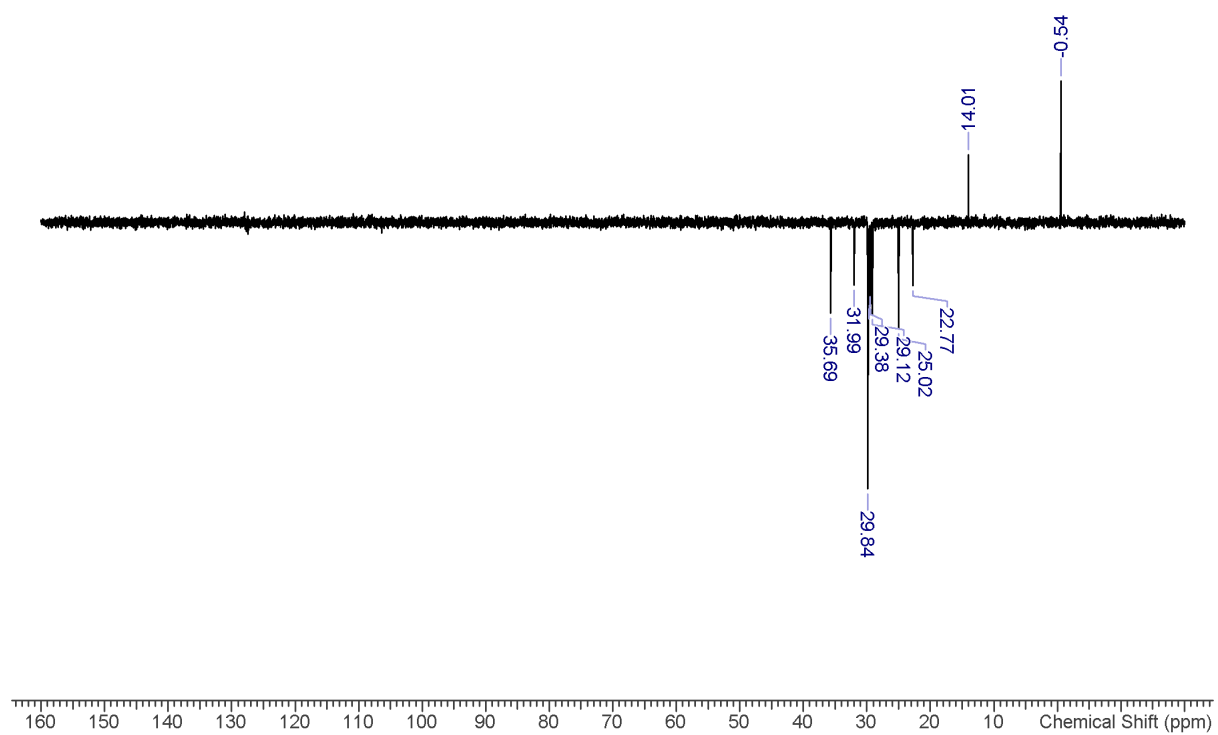

**Figure S27.**  $^{13}\text{C}$ -DEPT135 NMR spectrum of  $\text{CH}_3\text{-(CH}_2\text{)}_{16}\text{-C(O)OSiMe}_3$  in  $\text{C}_6\text{D}_6$  at 298 K.



## 2. Computational data

**Computational details.** All computations were performed using Gaussian09<sup>[3]</sup> utilizing the PBE1PBE level of theory and 6-311G(d,p) basis sets. No solvent corrections were applied. Natural Bond Orbital and Natural Resonance Theory were applied to study the electronic states.<sup>[4-6]</sup>

### 3.1 HPCO and DPCO

|      |    | Natural Population |         |         |         |          |
|------|----|--------------------|---------|---------|---------|----------|
| Atom | No | Charge             | Core    | Valence | Rydberg | Total    |
| C    | 1  | 0.34387            | 1.99962 | 3.60027 | 0.05625 | 5.65613  |
| P    | 2  | 0.02542            | 9.99822 | 4.94077 | 0.03560 | 14.97458 |
| H    | 3  | 0.03328            | 0.00000 | 0.96122 | 0.00550 | 0.96672  |
| O    | 4  | -0.40257           | 1.99971 | 6.38248 | 0.02038 | 8.40257  |

|     |                            | (Occupancy) Bond orbital/ Coefficients |                        |                  |                |
|-----|----------------------------|----------------------------------------|------------------------|------------------|----------------|
| 1.  | (1.99461) BD (1) C 1 - P 2 | ( 65.63%)                              | 0.8101* C 1 s( 61.58%) | p 0.62( 38.36%)  | d 0.00( 0.06%) |
|     |                            | ( 34.37%)                              | 0.5863* P 2 s( 16.31%) | p 5.08( 82.88%)  | d 0.05( 0.81%) |
| 2.  | (1.99436) BD (2) C 1 - P 2 | ( 34.49%)                              | 0.5873* C 1 s( 0.00%)  | p 1.00( 99.81%)  | d 0.00( 0.19%) |
|     |                            | ( 65.51%)                              | 0.8094* P 2 s( 0.00%)  | p 1.00( 99.58%)  | d 0.00( 0.42%) |
| 3.  | (1.99987) BD (1) C 1 - O 4 | ( 32.68%)                              | 0.5717* C 1 s( 38.58%) | p 1.59( 61.27%)  | d 0.00( 0.15%) |
|     |                            | ( 67.32%)                              | 0.8205* O 4 s( 45.88%) | p 1.18( 54.00%)  | d 0.00( 0.12%) |
| 4.  | (1.99698) BD (2) C 1 - O 4 | ( 29.91%)                              | 0.5469* C 1 s( 0.28%)  | p 99.99( 99.19%) | d 1.87( 0.53%) |
|     |                            | ( 70.09%)                              | 0.8372* O 4 s( 0.83%)  | p 99.99( 99.01%) | d 0.19( 0.16%) |
| 5.  | (1.89638) BD (1) P 2 - H 3 | ( 49.27%)                              | 0.7019* P 2 s( 12.17%) | p 7.16( 87.16%)  | d 0.06( 0.67%) |
|     |                            | ( 50.73%)                              | 0.7122* H 3 s( 99.74%) | p 0.00( 0.26%)   |                |
| 13. | (1.91245) LP (1) P 2       |                                        | s( 72.30%)             | p 0.38( 27.64%)  | d 0.00( 0.06%) |

GETTING A SIMPLE ANSWER FROM A PROFESSOR IS LIKE  
GETTING A THIMBLE OF WATER FROM A FIRE HYDRANT.  
-- PROF. LEN SHAPIRO, NDSU

### 3.1.1 HPCO – displacement vectors for the vibrations

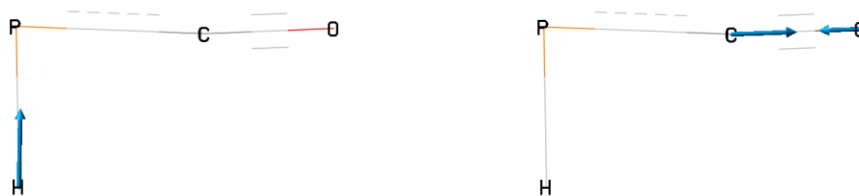

**Figure S28.** Displacement vectors for v1 (left) and v2 (right) of HPCO.

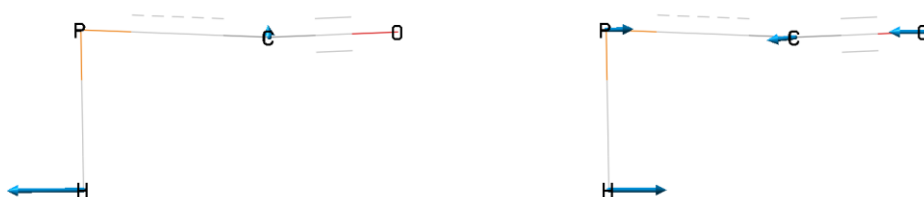

**Figure S29.** Displacement vectors for v3 (left) and v4 (right) of HPCO.

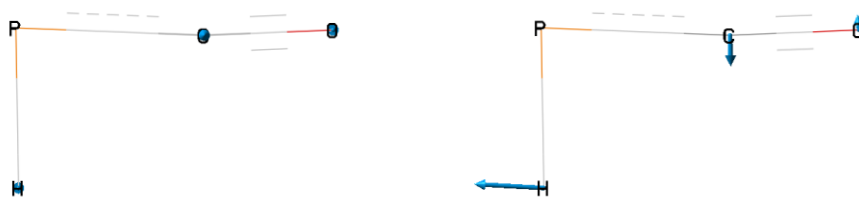

**Figure S30.** Displacement vectors for  $v_6$  (left) and  $v_5$  (right) of HPCO.

### 3.1.2 DPCO – displacement vectors for the vibrations

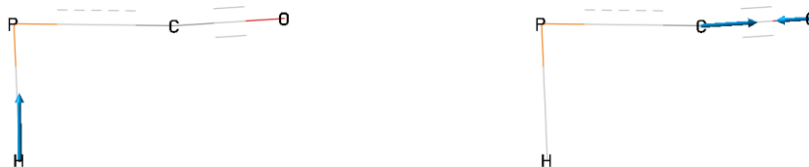

**Figure S31.** Displacement vectors for  $v_1$  (left) and  $v_2$  (right) of DPCO.

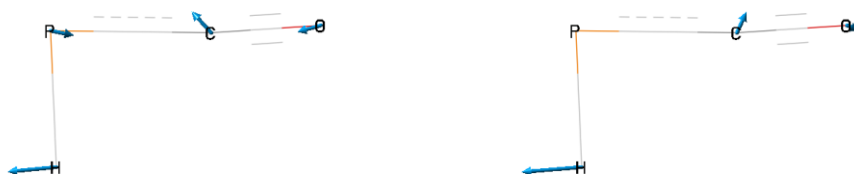

**Figure S32.** Displacement vectors for v3 (left) and v4 (right) of DPCO.

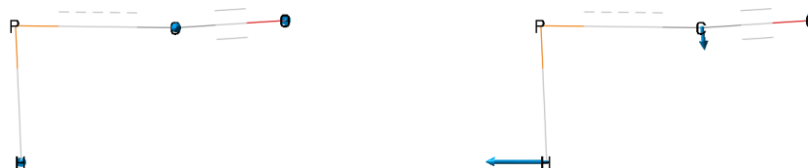

**Figure S33.** Displacement vectors for v5 (left) and v6 (right) of DPCO.

### 3.1.3 HPCO – vibrational analysis

Derivatives of the Inertia Moments w.r.t  
Normal modes (in amu<sup>1/2</sup>.Ang)

|       | Ixx       | Ixy     | Iyy      | Ixz     | Iyz     | Izz     |           |
|-------|-----------|---------|----------|---------|---------|---------|-----------|
| Q( 1) | 0.09565   | 0.04900 | -2.81527 | 0.00000 | 0.00000 | 0.00000 | -2.71962  |
| Q( 2) | -4.46827  | 0.25060 | -0.07077 | 0.00000 | 0.00000 | 0.00000 | -4.53904  |
| Q( 3) | 2.42924   | 2.38620 | 0.15503  | 0.00000 | 0.00000 | 0.00000 | 2.58427   |
| Q( 4) | -18.32119 | 0.42555 | 0.01517  | 0.00000 | 0.00000 | 0.00000 | -18.30602 |
| Q( 5) | 0.67572   | 1.37596 | -0.19553 | 0.00000 | 0.00000 | 0.00000 | 0.48019   |
| Q( 6) | 0.00000   | 0.00000 | 0.00000  | 0.00000 | 0.00000 | 0.00000 | 0.00000   |

Vibro-rotational Alpha Matrix

Vibro-Rot alpha Matrix (in cm<sup>-1</sup>)

|       | a(z)     | b(x)     | c(y)     |
|-------|----------|----------|----------|
| Q( 1) | 0.24157  | 0.00001  | 0.00011  |
| Q( 2) | 0.00399  | 0.00099  | 0.00094  |
| Q( 3) | -0.26752 | -0.00020 | 0.00000  |
| Q( 4) | -0.00191 | 0.00073  | 0.00079  |
| Q( 5) | 2.43152  | -0.00059 | -0.00029 |
| Q( 6) | -2.32447 | -0.00019 | -0.00037 |

Vibro-Rot alpha Matrix (in MHz)

|       | a            | b         | c         |
|-------|--------------|-----------|-----------|
| Q( 1) | 7242.04901   | 0.16560   | 3.15202   |
| Q( 2) | 119.66048    | 29.53050  | 28.24947  |
| Q( 3) | -8020.16981  | -6.08416  | -0.13669  |
| Q( 4) | -57.12735    | 21.81956  | 23.66464  |
| Q( 5) | 72895.05345  | -17.66941 | -8.63623  |
| Q( 6) | -69685.82397 | -5.67142  | -11.03286 |

Quartic Centrifugal Distortion Constants

NOTE: Values in Cartesian coords. refer to the structure in Input orientation

Quartic Centrifugal Distortion Constants Tau Prime

|           | cm <sup>-1</sup>  | MHz               |
|-----------|-------------------|-------------------|
| TauP aaaa | -0.2003721854D-02 | -0.6007006998D+02 |
| TauP bbaa | -0.2343076287D-04 | -0.7024365993D+00 |
| TauP bbbb | -0.1839227044D-06 | -0.5513863964D-02 |
| TauP ccaa | -0.4376089400D-06 | -0.1311918598D-01 |
| TauP ccbb | -0.1758204046D-06 | -0.5270963125D-02 |
| TauP cccc | -0.1685109370D-06 | -0.5051830800D-02 |

Asymmetric Top Reduction

Asymmetric Top Parameter Kappa : -0.9990251599  
 Asymmetric Top Parameter Sigma : 4102.2369680796

Constants in the Asymmetrically reduced Hamiltonian

|            | cm <sup>-1</sup> | MHz              |
|------------|------------------|------------------|
| DELTA J :  | 0.4405420518D-07 | 0.1320711846D-02 |
| DELTA K :  | 0.4950075239D-03 | 0.1483995223D+02 |
| DELTA JK : | 0.5878885437D-05 | 0.1762445516D+00 |
| delta J :  | 0.9632354654D-09 | 0.2887707278D-04 |
| delta K :  | 0.3076455124D-05 | 0.9222980435D-01 |

Effective Rotational Constants

(Include Terms due to Quartic Centrifugal Distortion Constants)

|   | Be in cm <sup>-1</sup> | B(A) in cm <sup>-1</sup> | B(A) in MHz  |
|---|------------------------|--------------------------|--------------|
| a | 8.436553794            | 8.436553793              | 252921.51988 |
| b | 0.186258790            | 0.186259197              | 5583.91025   |
| c | 0.182235470            | 0.182235064              | 5463.26977   |

Nielsen Centrifugal Distortion Constants

|     | cm <sup>-1</sup> | MHz              |
|-----|------------------|------------------|
| DJ  | 0.4402942917D-07 | 0.1319969079D-02 |
| DJK | 0.5879034093D-05 | 0.1762490082D+00 |
| DK  | 0.4950074000D-03 | 0.1483994852D+02 |
| dJ  | 0.9632354654D-09 | 0.2887707278D-04 |

R5 -0.1436590503D-05 -0.4306789979D-01  
R6 -0.1238800440D-10 -0.3713830288D-06

Constants in the Symmetrically Reduced Hamiltonian

-----  
          cm^-1          MHz  
D J : 0.4367923231D-07   0.1309470442D-02  
D JK : 0.5881135275D-05   0.1763120000D+00  
D K : 0.4950056490D-03   0.1483989602D+02  
d 1 : -0.9632354654D-09   -0.2887707278D-04  
d 2 : -0.1874864341D-09   -0.5620701892D-05

Effective Rotational Constants  
(Include Terms due to Quartic Centrifugal Distortion Constants)

-----  
          Be in cm^-1      B(S) in cm^-1      B(S) in MHz  
a      8.436553794         8.436553795         252921.51993  
b      0.186258790         0.186253043         5583.72577  
c      0.182235470         0.182241216         5463.45421

Wilson Centrifugal Distortion Constants

-----  
          cm^-1          MHz  
DJ 0.4598067611D-07   0.1378465991D-02  
DJK 0.1162342008D-04   0.3484613677D+00  
DK 0.4892610628D-03   0.1466767766D+02

Nielsen Centrifugal Distortion Constants

-----  
          cm^-1          MHz  
DJ 0.4402942917D-07   0.1319969079D-02  
DJK 0.5879034093D-05   0.1762490082D+00  
DK 0.4950074000D-03   0.1483994852D+02  
dJ 0.9632354654D-09   0.2887707278D-04  
R5 -0.1436590503D-05   -0.4306789979D-01  
R6 -0.1238800440D-10   -0.3713830288D-06

Rotational Constants (in cm^-1)

-----  
equilibrium (e), ground vibr.state (00), and 00 + centr. dist.(0)  
Ae= 8.4365538   A00= 8.3949643   A0= 8.3949643  
Be= 0.1862588   B00= 0.1858904   B0= 0.1858908  
Ce= 0.1822355   C00= 0.1816474   C0= 0.1816470

Rotational Constants (in MHz)

-----  
equilibrium (e), ground vibr.state (00), and 00 + centr. dist.(0)  
Ae= 252921.520   A00= 251674.699   A0= 251674.699  
Be= 5583.898   B00= 5572.853   B0= 5572.865  
Ce= 5463.282   C00= 5445.652   C0= 5445.640

Test of Quartic Planarity Relationships

-----  
Asymmetric Reduction I r  
4C\*DELJ - (B-C)\*DELJK - 2\*(2A+B+C)\*SDELJ + 2\*(B-C)\*SDELK = 0  
VALUE = 0.9595295106D-22

Symmetric Reduction I r  
4C\*DJ - (B-C)\*DJK + 2\*(2A+B+C)\*D1 - 4\*(4A+B-3C)\*D2 = 0  
Value = 0.1058791184D-21

=====

Sextic Centrifugal Distortion Constants

=====

Sextic Distortion Constants

-----

|         | in cm-1           | in Hz             |
|---------|-------------------|-------------------|
| Phi aaa | -0.1376284594D-05 | -0.4125997414D+05 |
| Phi aab | -0.7024130662D-07 | -0.2105781396D+04 |
| Phi aac | -0.6137600127D-08 | -0.1840006228D+03 |
| Phi abb | 0.4354676859D-11  | 0.1305499279D+00  |
| Phi abc | -0.3169929188D-11 | -0.9503208631D-01 |
| Phi acc | -0.6440618474D-11 | -0.1930848843D+00 |
| Phi bbb | -0.9018811379D-14 | -0.2703771631D-03 |
| Phi bbc | -0.1746360949D-13 | -0.5235458416D-03 |
| Phi bcc | -0.1992192022D-13 | -0.5972441432D-03 |
| Phi ccc | -0.1750173342D-13 | -0.5246887682D-03 |

#### Asymmetric Top Reduction

-----  
Asymmetric Top Parameter Kappa : -0.9990251599  
Asymmetric Top Parameter Sigma : 4102.2369680796

#### Constants in the A reduced Hamiltonian

|          | in cm <sup>-1</sup> | in Hz             |
|----------|---------------------|-------------------|
| Phi J :  | -0.1326027240D-13   | -0.3975329657D-03 |
| Phi K :  | -0.1299898204D-05   | -0.3896996777D+05 |
| Phi JK : | 0.1895582745D-11    | 0.5682814104D-01  |
| Phi KJ : | -0.7638827272D-07   | -0.2290062804D+04 |
| phi j :  | 0.2120730511D-14    | 0.6357790127D-04  |
| phi k :  | -0.2111541051D-07   | -0.6330240818D+03 |
| phi jk : | 0.2886598776D-11    | 0.8653805425D-01  |
| rho :    | -0.1750984297D-09   |                   |
| mu :     | -0.3449127582D-11   |                   |
| nu :     | -0.1492020260D-15   |                   |
| lambda : | 0.7430267049D-15    |                   |

#### Constants in the S reduced Hamiltonian

|        | in cm <sup>-1</sup> | in Hz             |
|--------|---------------------|-------------------|
| H J :  | -0.1370388817D-13   | -0.4108322319D-03 |
| H K :  | -0.1299883888D-05   | -0.3896953858D+05 |
| H JK : | 0.8033784983D-11    | 0.2408468147D+00  |
| H KJ : | -0.7640872674D-07   | -0.2290676000D+04 |
| h 1 :  | 0.2214209091D-14    | 0.6638031858D-04  |
| h 2 :  | 0.2218078846D-15    | 0.6649633093D-05  |
| h 3 :  | -0.9347857935D-16   | -0.2802417307D-05 |

=====  
Average Coordinates and Mean Square Amplitudes  
=====

NOTE: Temperature is given in K between parentheses  
For Cartesian and internal coords., units are given between  
parentheses next to each label

#### Mean Square Amplitudes of Normal Coordinates (in amu.bohr<sup>2</sup>)

| Mode | <Q <sup>2</sup> > (0) | <Q <sup>2</sup> > (298.15) | <Q <sup>2</sup> > (298.15) class. |
|------|-----------------------|----------------------------|-----------------------------------|
| 1    | 0.025108              | 0.025109                   | 0.171345                          |
| 2    | 0.028336              | 0.028338                   | 0.218226                          |
| 3    | 0.068851              | 0.070907                   | 1.288429                          |
| 4    | 0.082397              | 0.087394                   | 1.845253                          |
| 5    | 0.155528              | 0.212349                   | 6.574400                          |
| 6    | 0.127477              | 0.156563                   | 4.416762                          |

#### Average Normal Coordinates (in amu<sup>1/2</sup>.bohr)

| Mode | <Q> (0)   | <Q> (298.15) |
|------|-----------|--------------|
| 1    | -0.021521 | -0.018959    |
| 2    | 0.000743  | 0.005735     |
| 3    | 0.009742  | 0.009262     |

|   |           |           |
|---|-----------|-----------|
| 4 | -0.029765 | -0.026154 |
| 5 | 0.012782  | 0.011615  |
| 6 | 0.000000  | 0.000000  |

Mean Square Amplitudes of Cartesian Coordinates

| Label       | $\langle(S-Se)^2\rangle^{1/2} (0)$ | $\langle(S-Se)^2\rangle^{1/2} (298.15)$ |
|-------------|------------------------------------|-----------------------------------------|
| X(1) (Angs) | 0.048078                           | 0.055155                                |
| Y(1) (Angs) | 0.027270                           | 0.027633                                |
| Z(1) (Angs) | 0.047216                           | 0.052326                                |
| X(2) (Angs) | 0.007495                           | 0.008163                                |
| Y(2) (Angs) | 0.018928                           | 0.019583                                |
| Z(2) (Angs) | 0.006732                           | 0.007461                                |
| X(3) (Angs) | 0.082457                           | 0.082523                                |
| Y(3) (Angs) | 0.155550                           | 0.168259                                |
| Z(3) (Angs) | 0.021531                           | 0.023862                                |
| X(4) (Angs) | 0.023403                           | 0.027219                                |
| Y(4) (Angs) | 0.026667                           | 0.027279                                |
| Z(4) (Angs) | 0.021030                           | 0.023306                                |

Average Cartesian Coordinates

| Label       | Se        | $\langle S \rangle = S_z (0)$ | $\langle S \rangle = S_z (298.15)$ |
|-------------|-----------|-------------------------------|------------------------------------|
| X(1) (Angs) | 0.000000  | 0.000984                      | 0.000879                           |
| Y(1) (Angs) | 0.589147  | 0.591220                      | 0.591590                           |
| Z(1) (Angs) | 0.000000  | 0.000000                      | 0.000000                           |
| X(2) (Angs) | 0.065583  | 0.065875                      | 0.065847                           |
| Y(2) (Angs) | -1.091267 | -1.093430                     | -1.093215                          |
| Z(2) (Angs) | 0.000000  | 0.000000                      | 0.000000                           |
| X(3) (Angs) | -1.360798 | -1.372092                     | -1.370689                          |
| Y(3) (Angs) | -1.068099 | -1.064706                     | -1.064737                          |
| Z(3) (Angs) | 0.000000  | 0.000000                      | 0.000000                           |
| X(4) (Angs) | 0.047131  | 0.046539                      | 0.046584                           |
| Y(4) (Angs) | 1.737777  | 1.740198                      | 1.739505                           |
| Z(4) (Angs) | 0.000000  | 0.000000                      | 0.000000                           |

Internal coordinates for the Equilibrium structure (Se)

Interatomic distances:

|     | 1        | 2        | 3        | 4        |
|-----|----------|----------|----------|----------|
| 1 C | 0.000000 |          |          |          |
| 2 P | 1.681693 | 0.000000 |          |          |
| 3 H | 2.144350 | 1.426569 | 0.000000 |          |
| 4 O | 1.149597 | 2.829104 | 3.139300 | 0.000000 |

Interatomic angles:

C1-P2-H3= 86.8345    P2-C1-O4=175.4153    H3-C1-O4=142.9596  
H3-P2-O4= 88.6958

Dihedral angles:

O4-C1-P2-H3= 180.

Internal coordinates for the vibrationally average structure at 0K (Sz)

Interatomic distances:

|     | 1        | 2        | 3        | 4        |
|-----|----------|----------|----------|----------|
| 1 C | 0.000000 |          |          |          |
| 2 P | 1.685900 | 0.000000 |          |          |
| 3 H | 2.151146 | 1.438254 | 0.000000 |          |
| 4 O | 1.149881 | 2.833694 | 3.143246 | 0.000000 |

Interatomic angles:

C1-P2-H3= 86.6497    P2-C1-O4=175.5236    H3-C1-O4=142.6053  
H3-P2-O4= 88.4647

Dihedral angles:

O4-C1-P2-H3= 180.

Internal coordinates for the vibr. average structure at 298.15K (Sa)

Interatomic distances:

|     | 1        | 2        | 3        | 4 |
|-----|----------|----------|----------|---|
| 1 C | 0.000000 |          |          |   |
| 2 P | 1.686058 | 0.000000 |          |   |
| 3 H | 2.150493 | 1.436818 | 0.000000 |   |



4 O 1.148825 2.832786 3.142044 0.000000  
 Interatomic angles:  
 C1-P2-H3= 86.656 P2-C1-O4=175.5117 H3-C1-O4=142.6526  
 H3-P2-O4= 88.4747  
 Dihedral angles:  
 O4-C1-P2-H3= 180.

=====  
 Vibrational Average of Electric-Field Properties  
 =====

Electric dipole  
 -----

-----  
 Property at reference geometry, Unit: Debye  
 -----

X= -0.6671 Y= -0.3867 Z= 0.0000  
 -----

Temperature: 0K, Unit: Debye  
 -----

X= -0.6510 Y= -0.4085 Z= 0.0000  
 -----

Temperature: 298K, Unit: Debye  
 -----

X= -0.6504 Y= -0.4075 Z= 0.0000  
 -----

=====  
 Nuclear Magnetic Resonance Spectroscopy  
 =====

Nuclear quadrupole tensors  
 -----

-----  
 Property at reference geometry  
 -----

Nuclear Quadrupole in Principal Axis System

| Atom    | a.u. | MegaHertz | Gauss    | 10(-4) cm-1 | Axes                          |
|---------|------|-----------|----------|-------------|-------------------------------|
| 1 C(13) | Baa  | -0.4455   | -59.777  | -21.330     | -19.939 0.9993 -0.0367 0.0000 |
|         | Bbb  | -0.1044   | -14.005  | -4.997      | -4.672 0.0000 0.0000 1.0000   |
|         | Bcc  | 0.5498    | 73.782   | 26.327      | 24.611 0.0367 0.9993 0.0000   |
| 2 P(31) | Baa  | -1.2466   | -269.488 | -96.160     | -89.891 0.4565 0.8897 0.0000  |
|         | Bbb  | 0.1676    | 36.228   | 12.927      | 12.084 0.8897 -0.4565 0.0000  |
|         | Bcc  | 1.0790    | 233.259  | 83.233      | 77.807 0.0000 0.0000 1.0000   |
| 3 H(1)  | Baa  | -0.1838   | -98.052  | -34.987     | -32.707 0.9999 0.0139 0.0000  |
|         | Bbb  | 0.0784    | 41.811   | 14.919      | 13.946 -0.0139 0.9999 0.0000  |
|         | Bcc  | 0.1054    | 56.242   | 20.068      | 18.760 0.0000 0.0000 1.0000   |
| 4 O(17) | Baa  | -0.5889   | 42.613   | 15.205      | 14.214 0.9999 0.0110 0.0000   |
|         | Bbb  | -0.0412   | 2.980    | 1.063       | 0.994 -0.0110 0.9999 0.0000   |
|         | Bcc  | 0.6301    | -45.592  | -16.268     | -15.208 0.0000 0.0000 1.0000  |

-----  
 Temperature: 0K  
 -----

Nuclear Quadrupole in Principal Axis System

| Atom    | a.u. | MegaHertz | Gauss    | 10(-4) cm-1 | Axes                           |
|---------|------|-----------|----------|-------------|--------------------------------|
| 1 C(13) | Baa  | -0.4408   | -59.146  | -21.105     | -19.729 0.9994 -0.0336 -0.0001 |
|         | Bbb  | -0.1020   | -13.682  | -4.882      | -4.564 0.0001 0.0000 1.0000    |
|         | Bcc  | 0.5427    | 72.828   | 25.987      | 24.293 0.0336 0.9994 0.0000    |
| 2 P(31) | Baa  | -1.2129   | -262.217 | -93.566     | -87.466 0.4641 0.8858 0.0000   |
|         | Bbb  | 0.1167    | 25.224   | 9.001       | 8.414 0.8858 -0.4641 0.0000    |
|         | Bcc  | 1.0963    | 236.993  | 84.565      | 79.052 0.0000 0.0000 1.0000    |
| 3 H(1)  | Baa  | -0.1771   | -94.516  | -33.726     | -31.527 0.9999 0.0113 0.0000   |
|         | Bbb  | 0.0741    | 39.527   | 14.104      | 13.185 -0.0113 0.9999 0.0000   |

```

Bcc 0.1031 54.989 19.621 18.342 0.0000 0.0000 1.0000

Baa -0.5810 42.039 15.000 14.023 0.9999 0.0134 -0.0001
4 O(17) Bbb -0.0455 3.293 1.175 1.098 -0.0134 0.9999 0.0000
Bcc 0.6265 -45.331 -16.175 -15.121 0.0001 0.0000 1.0000

```

-----  
Temperature: 298K  
-----

```

Nuclear Quadrupole in Principal Axis System
Atom      a.u. MegaHertz Gauss 10(-4) cm-1  Axes
Baa -0.4399 -59.027 -21.062 -19.689 0.9994 -0.0336 -0.0001
1 C(13) Bbb -0.1018 -13.665 -4.876 -4.558 0.0001 0.0000 1.0000
Bcc 0.5417 72.692 25.938 24.247 0.0336 0.9994 0.0000

Baa -1.2081 -261.177 -93.194 -87.119 0.4632 0.8862 0.0000
2 P(31) Bbb 0.1135 24.541 8.757 8.186 0.8862 -0.4632 0.0000
Bcc 1.0946 236.636 84.438 78.933 0.0000 0.0000 1.0000

Baa -0.1765 -94.181 -33.606 -31.415 0.9999 0.0117 0.0000
3 H(1) Bbb 0.0735 39.222 13.995 13.083 -0.0117 0.9999 0.0000
Bcc 0.1030 54.959 19.611 18.332 0.0000 0.0000 1.0000

Baa -0.5823 42.135 15.035 14.055 0.9999 0.0121 -0.0001
4 O(17) Bbb -0.0414 2.999 1.070 1.000 -0.0121 0.9999 0.0000
Bcc 0.6237 -45.134 -16.105 -15.055 0.0001 0.0000 1.0000

```

=====  
Resonance Analysis  
=====

Thresholds  
-----

Maximum Difference PT2 vs. Variational (cm-1) : 1.000  
Minimum value for Darling-Dennison term (cm-1): 10.000

Fermi resonances  
-----

No Fermi resonance found

Darling-Dennison resonances  
-----

No Darling-Dennison resonance found

=====  
Anharmonic X Matrix  
=====

PT2 model: Deperturbed VPT2 (DVPT2)  
Ref.: V. Barone, J. Chem. Phys. 122, 1, 014108 (2005)

Coriolis contributions to X Matrix (in cm<sup>-1</sup>)  
-----

|   | 1            | 2            | 3            | 4            | 5            |
|---|--------------|--------------|--------------|--------------|--------------|
| 1 | 0.000000D+00 |              |              |              |              |
| 2 | 0.124897D-04 | 0.000000D+00 |              |              |              |
| 3 | 0.397471D+00 | 0.114554D+00 | 0.000000D+00 |              |              |
| 4 | 0.115801D-01 | 0.110884D-02 | 0.213853D-01 | 0.000000D+00 |              |
| 5 | 0.301412D+00 | 0.745306D+00 | 0.468391D-03 | 0.749382D-02 | 0.000000D+00 |
| 6 | 0.346380D+00 | 0.863986D+00 | 0.489361D+01 | 0.558797D-01 | 0.128551D+02 |
| 6 | 0.000000D+00 |              |              |              |              |

3rd Deriv. contributions to X Matrix (in cm<sup>-1</sup>)  
-----

|   | 1             | 2 | 3 | 4 | 5 |
|---|---------------|---|---|---|---|
| 1 | -0.905858D+02 |   |   |   |   |

2 -0.123109D+01 -0.232407D+02  
 3 0.470393D+02 0.164388D+01 -0.585000D+01  
 4 -0.319201D+00 -0.474270D+01 -0.387102D+00 -0.600270D+01  
 5 0.548201D+02 0.304157D+02 -0.302015D+02 -0.122967D+02 -0.122119D+02  
 6 0.683705D+00 0.295755D+02 -0.301145D+00 -0.147659D+01 -0.111515D+02  
 6  
 6 -0.816466D+01

4th Deriv. contributions to X Matrix (in cm<sup>-1</sup>)

```
-----
      1      2      3      4      5
1 0.717822D+02
2 0.813928D-01 0.120578D+02
3 -0.606904D+02 -0.496199D+01 -0.308535D+00
4 -0.120983D+01 0.374971D+01 -0.262897D+01 0.194679D+01
5 -0.507975D+02 -0.350812D+02 0.192249D+02 -0.295369D+01 0.154440D+02
6 -0.122383D+01 -0.360091D+02 -0.226817D+01 -0.368478D+01 0.122043D+02
6
6 0.894709D+01
```

Total Anharmonic X Matrix (in cm<sup>-1</sup>)

```
-----
      1      2      3      4      5
1 -0.188036D+02
2 -0.114968D+01 -0.111830D+02
3 -0.132536D+02 -0.320356D+01 -0.615854D+01
4 -0.151745D+01 -0.991885D+00 -0.299468D+01 -0.405591D+01
5 0.432407D+01 -0.392021D+01 -0.109761D+02 -0.152429D+02 0.323207D+01
6 -0.193744D+00 -0.556957D+01 0.232429D+01 -0.510550D+01 0.139080D+02
6
6 0.782427D+00
```

=====  
 Anharmonic Zero Point Energy  
 =====

Anharmonic Zero Point Energy

```
-----
Harmonic      : cm-1 = 3493.18738 ; Kcal/mol = 9.988 ; KJ/mol = 41.788
Anharm.Pot.   : cm-1 = -17.70850 ; Kcal/mol = -0.051 ; KJ/mol = -0.212
Watson+Coriolis: cm-1 = -1.54097 ; Kcal/mol = -0.004 ; KJ/mol = -0.018
XOF (Im. Freq.): cm-1 = 0.00000 ; Kcal/mol = 0.000 ; KJ/mol = 0.000
Total Anharm  : cm-1 = 3473.93791 ; Kcal/mol = 9.932 ; KJ/mol = 41.558
```

=====  
 Vibrational Energies at Anharmonic Level  
 =====

Vibrational Energies and Rotational Constants (in cm<sup>-1</sup>)

```
-----
Mode(Quanta)  E(harm)  E(anharm)  Aa(z)  Ba(x)  Ca(y)
Equilibrium Geometry      8.436554  0.186259  0.182235
Ground State    3493.187  3473.938  8.394964  0.185891  0.181647
Fundamental Bands (DE w.r.t. Ground State)
1(1) active    2397.602  2354.100  8.153396  0.185885  0.181542
2(1) active    2124.515  2094.732  8.390973  0.184906  0.180705
3(1) active     874.345   847.976  8.662488  0.186094  0.181652
4(1) active     730.609   709.571  8.396870  0.185163  0.180858
5(1) active     387.066   387.576  5.963447  0.186480  0.181935
6(1) active     472.238   476.485  10.719433  0.186080  0.182015
Overtones (DE w.r.t. Ground State)
1(2)           4795.204  4670.592  7.911827  0.185880  0.181437
2(2)           4249.031  4167.098  8.386981  0.183921  0.179762
3(2)           1748.689  1683.634  8.930012  0.186297  0.181656
4(2)           1461.218  1411.030  8.398775  0.184435  0.180068
5(2)           774.132   781.617  3.531930  0.187070  0.182223
6(2)           944.476   954.534  13.043902  0.186269  0.182383
Combination Bands (DE w.r.t. Ground State)
```

|      |      |          |          |           |          |          |
|------|------|----------|----------|-----------|----------|----------|
| 2(1) | 1(1) | 4522.117 | 4447.682 | 8.149404  | 0.184900 | 0.180600 |
| 3(1) | 1(1) | 3271.947 | 3188.822 | 8.420920  | 0.186088 | 0.181546 |
| 3(1) | 2(1) | 2998.860 | 2939.504 | 8.658497  | 0.185109 | 0.180709 |
| 4(1) | 1(1) | 3128.211 | 3062.153 | 8.155301  | 0.185157 | 0.180752 |
| 4(1) | 2(1) | 2855.124 | 2803.311 | 8.392878  | 0.184178 | 0.179915 |
| 4(1) | 3(1) | 1604.953 | 1554.552 | 8.664394  | 0.185366 | 0.180862 |
| 5(1) | 1(1) | 2784.668 | 2746.000 | 5.721878  | 0.186475 | 0.181830 |
| 5(1) | 2(1) | 2511.581 | 2478.388 | 5.959456  | 0.185495 | 0.180993 |
| 5(1) | 3(1) | 1261.410 | 1224.576 | 6.230971  | 0.186683 | 0.181940 |
| 5(1) | 4(1) | 1117.675 | 1081.904 | 5.965353  | 0.185752 | 0.181146 |
| 6(1) | 1(1) | 2869.840 | 2830.390 | 10.477864 | 0.186074 | 0.181910 |
| 6(1) | 2(1) | 2596.753 | 2565.647 | 10.715442 | 0.185095 | 0.181073 |
| 6(1) | 3(1) | 1346.583 | 1326.785 | 10.986957 | 0.186283 | 0.182020 |
| 6(1) | 4(1) | 1202.847 | 1180.950 | 10.721339 | 0.185352 | 0.181226 |
| 6(1) | 5(1) | 859.304  | 877.969  | 8.287916  | 0.186669 | 0.182303 |

=====  
Thermodynamic properties and Partition Functions  
=====

ZPE(harm) = 0.41788D+02 kJ/mol      ZPE(anh) = 0.41558D+02 kJ/mol

Input values of T(K) and P(atm): 298.15 1.00

|            | Harmonic value | SPT anharmonic value |           |
|------------|----------------|----------------------|-----------|
| Qvib       | 0.65813D-07    | 0.72402D-07          |           |
| QZvib      | 0.13779D+01    | 0.13813D+01          |           |
| Energy     | 0.51137D+02    | 0.50934D+02          | kJ/mol    |
| Enthalpy   | 0.53616D+02    | 0.53413D+02          | kJ/mol    |
| Entropy    | 0.25784D+03    | 0.25795D+03          | J/(mol K) |
| Sp.Heat(V) | 0.42211D+02    | 0.42500D+02          | J/(mol K) |
| Sp.Heat(P) | 0.50526D+02    | 0.50814D+02          | J/(mol K) |

T = 298.15 K; P = 1.00 atm

|            | Harmonic value | SPT anharmonic value |           |
|------------|----------------|----------------------|-----------|
| Qvib       | 0.65813D-07    | 0.72402D-07          |           |
| QZvib      | 0.13779D+01    | 0.13813D+01          |           |
| Energy     | 0.51137D+02    | 0.50934D+02          | kJ/mol    |
| Enthalpy   | 0.53616D+02    | 0.53413D+02          | kJ/mol    |
| Entropy    | 0.25784D+03    | 0.25795D+03          | J/(mol K) |
| Sp.Heat(V) | 0.42211D+02    | 0.42500D+02          | J/(mol K) |
| Sp.Heat(P) | 0.50526D+02    | 0.50814D+02          | J/(mol K) |

T = 500.00 K; P = 1.00 atm

|            | Harmonic value | SPT anharmonic value |           |
|------------|----------------|----------------------|-----------|
| Qvib       | 0.10738D-03    | 0.11476D-03          |           |
| QZvib      | 0.24910D+01    | 0.25188D+01          |           |
| Energy     | 0.60697D+02    | 0.60557D+02          | kJ/mol    |
| Enthalpy   | 0.64854D+02    | 0.64714D+02          | kJ/mol    |
| Entropy    | 0.28641D+03    | 0.28669D+03          | J/(mol K) |
| Sp.Heat(V) | 0.51543D+02    | 0.51861D+02          | J/(mol K) |
| Sp.Heat(P) | 0.59857D+02    | 0.60175D+02          | J/(mol K) |

T = 1000.00 K; P = 1.00 atm

|            | Harmonic value | SPT anharmonic value |           |
|------------|----------------|----------------------|-----------|
| Qvib       | 0.72582D-01    | 0.76830D-01          |           |
| QZvib      | 0.11055D+02    | 0.11382D+02          |           |
| Energy     | 0.89797D+02    | 0.89808D+02          | kJ/mol    |
| Enthalpy   | 0.98111D+02    | 0.98122D+02          | kJ/mol    |
| Entropy    | 0.33205D+03    | 0.33253D+03          | J/(mol K) |
| Sp.Heat(V) | 0.63313D+02    | 0.63582D+02          | J/(mol K) |
| Sp.Heat(P) | 0.71628D+02    | 0.71896D+02          | J/(mol K) |

T = 1500.00 K; P = 1.00 atm

|          | Harmonic value | SPT anharmonic value |        |
|----------|----------------|----------------------|--------|
| Qvib     | 0.13868D+01    | 0.14717D+01          |        |
| QZvib    | 0.39553D+02    | 0.41205D+02          |        |
| Energy   | 0.12294D+03    | 0.12306D+03          | kJ/mol |
| Enthalpy | 0.13541D+03    | 0.13553D+03          | kJ/mol |

|            |             |             |           |
|------------|-------------|-------------|-----------|
| Entropy    | 0.36222D+03 | 0.36280D+03 | J/(mol K) |
| Sp.Heat(V) | 0.68560D+02 | 0.68737D+02 | J/(mol K) |
| Sp.Heat(P) | 0.76874D+02 | 0.77051D+02 | J/(mol K) |

T = 2000.00 K; P = 1.00 atm

|            | Harmonic value | SPT anharmonic value |           |
|------------|----------------|----------------------|-----------|
| Qvib       | 0.94238D+01    | 0.10032D+02          |           |
| QZvib      | 0.11630D+03    | 0.12211D+03          |           |
| Energy     | 0.15790D+03    | 0.15810D+03          | kJ/mol    |
| Enthalpy   | 0.17453D+03    | 0.17472D+03          | kJ/mol    |
| Entropy    | 0.38471D+03    | 0.38533D+03          | J/(mol K) |
| Sp.Heat(V) | 0.71007D+02    | 0.71123D+02          | J/(mol K) |
| Sp.Heat(P) | 0.79321D+02    | 0.79438D+02          | J/(mol K) |

=====  
Anharmonic Transition Moments  
=====

Electric dipole : Fundamental Bands

| Mode(Quanta) | X             | Y             | Z             |
|--------------|---------------|---------------|---------------|
| 1(1)         | -0.202030E-01 | -0.521957E-02 | 0.121075E-05  |
| 2(1)         | 0.506949E-02  | 0.141696      | -0.875508E-06 |
| 3(1)         | 0.254319E-01  | -0.147616E-01 | -0.987147E-06 |
| 4(1)         | 0.230256E-02  | -0.203568E-01 | 0.705510E-13  |
| 5(1)         | 0.330765E-01  | 0.128453E-01  | -0.292233E-05 |
| 6(1)         | 0.154851E-12  | -0.131370E-05 | 0.316247E-02  |

Electric dipole : Overtones

| Mode(Quanta) | X             | Y             | Z             |
|--------------|---------------|---------------|---------------|
| 1(2)         | -0.194582E-03 | 0.310704E-03  | 0.169556E-13  |
| 2(2)         | 0.150599E-03  | 0.934808E-02  | -0.447082E-14 |
| 3(2)         | -0.304696E-02 | -0.431908E-02 | 0.176215E-13  |
| 4(2)         | -0.305587E-03 | 0.423701E-02  | -0.187956E-14 |
| 5(2)         | -0.573122E-03 | 0.116518E-01  | -0.259840E-13 |
| 6(2)         | 0.861630E-03  | 0.650419E-02  | -0.115270E-13 |

Electric dipole : Combination Bands

| Mode(Quanta) | X             | Y             | Z             |
|--------------|---------------|---------------|---------------|
| 2(1) 1(1)    | -0.237073E-02 | -0.670918E-04 | 0.675588E-15  |
| 3(1) 1(1)    | 0.238137E-03  | -0.657890E-03 | -0.504806E-14 |
| 3(1) 2(1)    | 0.389841E-03  | -0.256330E-02 | 0.316042E-15  |
| 4(1) 1(1)    | 0.175716E-02  | -0.873543E-03 | -0.562337E-15 |
| 4(1) 2(1)    | 0.788197E-03  | 0.102210E-01  | -0.735385E-14 |
| 4(1) 3(1)    | -0.180804E-03 | -0.291041E-02 | 0.278977E-14  |
| 5(1) 1(1)    | 0.103888E-02  | 0.141674E-02  | -0.625682E-14 |
| 5(1) 2(1)    | 0.838431E-03  | 0.804261E-05  | -0.338008E-15 |
| 5(1) 3(1)    | -0.333575E-02 | -0.119550E-01 | 0.242904E-13  |
| 5(1) 4(1)    | -0.109541E-02 | -0.131268E-02 | 0.294296E-14  |
| 6(1) 1(1)    | 0.786269E-17  | -0.110649E-15 | -0.539258E-03 |
| 6(1) 2(1)    | -0.228913E-14 | 0.322140E-13  | 0.242393E-03  |
| 6(1) 3(1)    | 0.754280E-16  | -0.106147E-14 | -0.154994E-02 |
| 6(1) 4(1)    | -0.232129E-14 | 0.326666E-13  | -0.390013E-03 |
| 6(1) 5(1)    | -0.670123E-15 | 0.943038E-14  | 0.131145E-04  |

ERROR: Missing derivatives of the polarizability tensor moment.

=====  
Anharmonic Infrared Spectroscopy  
=====

Units: Energies (E) in cm<sup>-1</sup>  
Integrated intensity (I) in km.mol<sup>-1</sup>

Fundamental Bands

| Mode(Quanta) | E(harm) | E(anharm) | I(harm) | I(anharm) |
|--------------|---------|-----------|---------|-----------|
|--------------|---------|-----------|---------|-----------|

|      |          |          |              |              |
|------|----------|----------|--------------|--------------|
| 1(1) | 2397.602 | 2354.100 | 15.64554092  | 16.59877824  |
| 2(1) | 2124.515 | 2094.732 | 706.83958695 | 681.95255009 |
| 3(1) | 874.345  | 847.976  | 12.43306229  | 11.87406086  |
| 4(1) | 730.609  | 709.571  | 6.20967207   | 4.82271436   |
| 5(1) | 387.066  | 387.576  | 8.20547358   | 7.90239049   |
| 6(1) | 472.238  | 476.485  | 0.08407113   | 0.07717163   |

Overtone

| Mode(Quanta) | E(harm)  | E(anharm) | I(anharm)  |
|--------------|----------|-----------|------------|
| 1(2)         | 4795.204 | 4670.592  | 0.01016545 |
| 2(2)         | 4249.031 | 4167.098  | 5.89859610 |
| 3(2)         | 1748.689 | 1683.634  | 0.76174120 |
| 4(2)         | 1461.218 | 1411.030  | 0.41234971 |
| 5(2)         | 774.132  | 781.617   | 1.72259843 |
| 6(2)         | 944.476  | 954.534   | 0.66541041 |

Combination Bands

| Mode(Quanta) | E(harm)  | E(anharm) | I(anharm)  |
|--------------|----------|-----------|------------|
| 2(1) 1(1)    | 4522.117 | 4447.682  | 0.40513905 |
| 3(1) 1(1)    | 3271.947 | 3188.822  | 0.02527932 |
| 3(1) 2(1)    | 2998.860 | 2939.504  | 0.32000899 |
| 4(1) 1(1)    | 3128.211 | 3062.153  | 0.19095180 |
| 4(1) 2(1)    | 2855.124 | 2803.311  | 4.77077948 |
| 4(1) 3(1)    | 1604.953 | 1554.552  | 0.21406353 |
| 5(1) 1(1)    | 2784.668 | 2746.000  | 0.13724955 |
| 5(1) 2(1)    | 2511.581 | 2478.388  | 0.02821639 |
| 5(1) 3(1)    | 1261.410 | 1224.576  | 3.05494818 |
| 5(1) 4(1)    | 1117.675 | 1081.904  | 0.05121325 |
| 6(1) 1(1)    | 2869.840 | 2830.390  | 0.01332897 |
| 6(1) 2(1)    | 2596.753 | 2565.647  | 0.00244115 |
| 6(1) 3(1)    | 1346.583 | 1326.785  | 0.05161650 |
| 6(1) 4(1)    | 1202.847 | 1180.950  | 0.00290902 |
| 6(1) 5(1)    | 859.304  | 877.969   | 0.00000245 |

### 3.1.4 DPCO – vibrational analysis

Derivatives of the Inertia Moments w.r.t  
Normal modes (in amu<sup>1/2</sup>.Ang)

|       | Ixx       | Ixy     | Iyy      | Ixz     | Iyz     | Izz       |
|-------|-----------|---------|----------|---------|---------|-----------|
| Q( 1) | -4.46959  | 0.25011 | 0.04059  | 0.00000 | 0.00000 | -4.42900  |
| Q( 2) | -0.06016  | 0.06569 | -3.92373 | 0.00000 | 0.00000 | -3.98389  |
| Q( 3) | 14.37964  | 1.58234 | 0.05935  | 0.00000 | 0.00000 | 14.43899  |
| Q( 4) | -11.78577 | 2.30525 | 0.07161  | 0.00000 | 0.00000 | -11.71416 |
| Q( 5) | -0.83425  | 2.65938 | -0.12836 | 0.00000 | 0.00000 | -0.96261  |
| Q( 6) | 0.00000   | 0.00000 | 0.00000  | 0.00000 | 0.00000 | 0.00000   |

Vibro-rotational Alpha Matrix

Vibro-Rot alpha Matrix (in cm<sup>-1</sup>)

|       | a(z)     | b(x)     | c(y)     |
|-------|----------|----------|----------|
| Q( 1) | 0.00157  | 0.00097  | 0.00090  |
| Q( 2) | 0.09114  | -0.00003 | 0.00010  |
| Q( 3) | -0.05573 | 0.00054  | 0.00045  |
| Q( 4) | -0.12253 | -0.00003 | 0.00030  |
| Q( 5) | 0.27478  | -0.00064 | -0.00022 |
| Q( 6) | -0.15894 | -0.00019 | -0.00035 |

Vibro-Rot alpha Matrix (in MHz)

|       | a           | b         | c         |
|-------|-------------|-----------|-----------|
| Q( 1) | 47.12532    | 29.15029  | 26.87539  |
| Q( 2) | 2732.16628  | -0.90877  | 3.05857   |
| Q( 3) | -1670.79146 | 16.07469  | 13.60570  |
| Q( 4) | -3673.30256 | -0.78327  | 9.13977   |
| Q( 5) | 8237.76049  | -19.31603 | -6.57153  |
| Q( 6) | -4764.99421 | -5.78791  | -10.58410 |

=====  
 Quartic Centrifugal Distortion Constants  
 =====

NOTE: Values in Cartesian coords. refer to the structure in Input orientation

Quartic Centrifugal Distortion Constants Tau Prime

|           | cm <sup>-1</sup>  | MHz               |
|-----------|-------------------|-------------------|
| TauP aaaa | -0.4661373702D-03 | -0.1397444680D+02 |
| TauP bbaa | -0.2322547432D-04 | -0.6962822036D+00 |
| TauP bbbb | -0.1815874715D-06 | -0.5443855443D-02 |
| TauP ccaa | -0.8390622327D-06 | -0.2515445292D-01 |
| TauP cccb | -0.1673826811D-06 | -0.5018006538D-02 |
| TauP cccc | -0.1555209815D-06 | -0.4662401732D-02 |

Asymmetric Top Reduction

Asymmetric Top Parameter Kappa : -0.9964695461  
 Asymmetric Top Parameter Sigma : 1131.9987773354

Constants in the Asymmetrically reduced Hamiltonian

|            | cm <sup>-1</sup> | MHz              |
|------------|------------------|------------------|
| DELTA J :  | 0.4213855663D-07 | 0.1263282147D-02 |
| DELTA K :  | 0.1105606399D-03 | 0.3314524598D+01 |
| DELTA JK : | 0.5931564140D-05 | 0.1778238193D+00 |
| delta J :  | 0.1629155625D-08 | 0.4884085693D-04 |
| delta K :  | 0.2962445860D-05 | 0.8881189262D-01 |

Effective Rotational Constants

(Include Terms due to Quartic Centrifugal Distortion Constants)

|   | Be in cm <sup>-1</sup> | B(A) in cm <sup>-1</sup> | B(A) in MHz  |
|---|------------------------|--------------------------|--------------|
| a | 4.376534287            | 4.376534287              | 131205.19713 |
| b | 0.183878356            | 0.183878688              | 5512.54438   |
| c | 0.176464279            | 0.176463948              | 5290.25607   |

Nielsen Centrifugal Distortion Constants

|     | cm <sup>-1</sup>  | MHz               |
|-----|-------------------|-------------------|
| DJ  | 0.4206533504D-07  | 0.1261087019D-02  |
| DJK | 0.5932003469D-05  | 0.1778369901D+00  |
| DK  | 0.1105602738D-03  | 0.3314513622D+01  |
| dJ  | 0.1629155625D-08  | 0.4884085693D-04  |
| R5  | -0.1398336178D-05 | -0.4192106399D-01 |
| R6  | -0.3661079588D-10 | -0.1097564049D-05 |

Constants in the Symmetrically Reduced Hamiltonian

|        | cm <sup>-1</sup>  | MHz               |
|--------|-------------------|-------------------|
| D J :  | 0.4083005440D-07  | 0.1224054237D-02  |
| D JK : | 0.5939415153D-05  | 0.1780591868D+00  |
| D K :  | 0.1105540973D-03  | 0.3314328459D+01  |
| d 1 :  | -0.1629155625D-08 | -0.4884085693D-04 |
| d 2 :  | -0.6542511175D-09 | -0.1961395507D-04 |

Effective Rotational Constants

(Include Terms due to Quartic Centrifugal Distortion Constants)

|   | Be in cm <sup>-1</sup> | B(S) in cm <sup>-1</sup> | B(S) in MHz  |
|---|------------------------|--------------------------|--------------|
| a | 4.376534287            | 4.376534293              | 131205.19733 |
| b | 0.183878356            | 0.183872760              | 5512.36668   |
| c | 0.176464279            | 0.176469870              | 5290.43362   |

Wilson Centrifugal Distortion Constants

|     | cm <sup>-1</sup> | MHz              |
|-----|------------------|------------------|
| DJ  | 0.4539686788D-07 | 0.1360963861D-02 |
| DJK | 0.1152194343D-04 | 0.3454191741D+00 |
| DK  | 0.1049670023D-03 | 0.3146831562D+01 |

Nielsen Centrifugal Distortion Constants

|     | cm <sup>-1</sup>  | MHz               |
|-----|-------------------|-------------------|
| DJ  | 0.4206533504D-07  | 0.1261087019D-02  |
| DJK | 0.5932003469D-05  | 0.1778369901D+00  |
| DK  | 0.1105602738D-03  | 0.3314513622D+01  |
| dJ  | 0.1629155625D-08  | 0.4884085693D-04  |
| R5  | -0.1398336178D-05 | -0.4192106399D-01 |
| R6  | -0.3661079588D-10 | -0.1097564049D-05 |

Rotational Constants (in cm<sup>-1</sup>)

equilibrium (e), ground vibr.state (00), and 00 + centr. dist.(0)  
Ae= 4.3765343 A00= 4.3613911 A0= 4.3613911  
Be= 0.1838784 B00= 0.1835710 B0= 0.1835713  
Ce= 0.1764643 C00= 0.1758718 C0= 0.1758715

Rotational Constants (in MHz)

equilibrium (e), ground vibr.state (00), and 00 + centr. dist.(0)  
Ae= 131205.197 A00= 130751.215 A0= 130751.215  
Be= 5512.534 B00= 5503.320 B0= 5503.330  
Ce= 5290.266 C00= 5272.504 C0= 5272.494

Test of Quartic Planarity Relationships

Asymmetric Reduction I r  
4C\*DELJ - (B-C)\*DELJK - 2\*(2A+B+C)\*SDELJ+ 2\*(B-C)\*SDELK = 0  
VALUE = -0.5293955920D-22  
Symmetric Reduction I r  
4C\*DJ - (B-C)\*DJK + 2\*(2A+B+C)\*D1 - 4\*(4A+B-3C)\*D2 = 0  
Value = -0.5293955920D-22

=====  
Sextic Centrifugal Distortion Constants  
=====

Sextic Distortion Constants

|         | in cm-1           | in Hz             |
|---------|-------------------|-------------------|
| Phi aaa | -0.6273608711D-08 | -0.1880780576D+03 |
| Phi aab | -0.1511046531D-07 | -0.4530003536D+03 |
| Phi aac | -0.3094483438D-08 | -0.9277027961D+02 |
| Phi abb | 0.2027863845D-10  | 0.6079382866D+00  |
| Phi abc | 0.1397119605D-10  | 0.4188459204D+00  |
| Phi acc | -0.2082873282D-11 | -0.6244297010D-01 |
| Phi bbb | -0.8035701647D-14 | -0.2409042749D-03 |
| Phi bbc | -0.2293178358D-13 | -0.6874775767D-03 |
| Phi bcc | -0.1679987751D-13 | -0.5036476573D-03 |
| Phi ccc | -0.1403052349D-13 | -0.4206245123D-03 |

Asymmetric Top Reduction



Asymmetric Top Parameter Kappa : -0.9964695461  
 Asymmetric Top Parameter Sigma : 1131.9987773354

Constants in the A reduced Hamiltonian

```

-----
                in cm^-1      in Hz
Phi J :   -0.1103311257D-13   -0.3307643936D-03
Phi K :    0.1196404184D-07    0.3586729510D+03
Phi JK :   0.2383465618D-10    0.7145450161D+00
Phi KJ :  -0.1826147417D-07   -0.5474652228D+03
phi j :   0.1498705460D-14    0.4493005936D-04
phi k :  -0.1238561333D-08   -0.3713113463D+02
phi jk :   0.1314104718D-10    0.3939586834D+00

rho :    -0.6176403217D-09
mu  :    -0.1791811881D-11
nu  :    -0.2141235974D-15
lambda :  0.4274539604D-14
  
```

Constants in the S reduced Hamiltonian

```

-----
                in cm^-1      in Hz
H J :   -0.1613669259D-13   -0.4837658737D-03
H K :    0.1196103420D-07    0.3585827844D+03
H JK :   0.2257629223D-10    0.6768202140D+00
H KJ :  -0.1825720307D-07   -0.5473371785D+03
h 1 :   0.1427537901D-14    0.4279650963D-04
h 2 :   0.2551790014D-14    0.7650074006D-04
h 3 :   0.7116755858D-16    0.2133549732D-05
  
```

=====  
 Average Coordinates and Mean Square Amplitudes  
 =====

NOTE: Temperature is given in K between parentheses  
 For Cartesian and internal coords., units are given between  
 parentheses next to each label

Mean Square Amplitudes of Normal Coordinates (in amu.bohr<sup>2</sup>)

```

-----
Mode  <Q^2> (0)  <Q^2> (298.15)  <Q^2> (298.15) class.
  1   0.028333   0.028335   0.218191
  2   0.034982   0.034999   0.332599
  3   0.079078   0.083197   1.699610
  4   0.088817   0.095829   2.144020
  5   0.174435   0.255798   8.269954
  6   0.127896   0.157320   4.445781
  
```

Average Normal Coordinates (in amu<sup>1/2</sup>.bohr)

```

-----
Mode  <Q> (0)  <Q> (298.15)
  1   0.002011  0.007234
  2  -0.021884 -0.017129
  3   0.026563  0.023376
  4  -0.018183 -0.015622
  5   0.008896  0.007599
  6   0.000000  0.000000
  
```

Mean Square Amplitudes of Cartesian Coordinates

```

-----
Label  <(S-Se)^2>^1/2 (0)  <(S-Se)^2>^1/2 (298.15)
X(1) (Angs)  0.047429  0.054619
Y(1) (Angs)  0.027523  0.027981
Z(1) (Angs)  0.047449  0.052625
X(2) (Angs)  0.008256  0.008606
Y(2) (Angs)  0.019254  0.020064
Z(2) (Angs)  0.006765  0.007503
X(3) (Angs)  0.067890  0.067950
  
```

|             |          |          |
|-------------|----------|----------|
| Y(3) (Angs) | 0.128577 | 0.148095 |
| Z(3) (Angs) | 0.010827 | 0.012008 |
| X(4) (Angs) | 0.024740 | 0.029553 |
| Y(4) (Angs) | 0.026864 | 0.027504 |
| Z(4) (Angs) | 0.021134 | 0.023439 |

Average Cartesian Coordinates

```

-----
Label      Se      <S> = Sz (0)  <S> = Sz (298.15)
X(1) (Angs) 0.000000  0.000772  0.000648
Y(1) (Angs) 0.589147  0.591327  0.591718
Z(1) (Angs) 0.000000  0.000000  0.000000
X(2) (Angs) 0.065583  0.066046  0.065953
Y(2) (Angs) -1.091267 -1.093446 -1.093202
Z(2) (Angs) 0.000000  0.000000  0.000000
X(3) (Angs) -1.360798 -1.368797 -1.367085
Y(3) (Angs) -1.068099 -1.066842 -1.066961
Z(3) (Angs) 0.000000  0.000000  0.000000
X(4) (Angs) 0.047131  0.046661  0.046721
Y(4) (Angs) 1.737777  1.740202  1.739452
Z(4) (Angs) 0.000000  0.000000  0.000000

```

Internal coordinates for the Equilibrium structure (Se)

```

Interatomic distances:
      1      2      3      4
1 C  0.000000
2 P  1.681693  0.000000
3 H  2.144350  1.426569  0.000000
4 O  1.149597  2.829104  3.139300  0.000000
Interatomic angles:
C1-P2-H3= 86.8345  P2-C1-O4=175.4153  H3-C1-O4=142.9596
H3-P2-O4= 88.6958
Dihedral angles:
O4-C1-P2-H3= 180.

```

Internal coordinates for the vibrationally average structure at 0K (Sz)

```

Interatomic distances:
      1      2      3      4
1 C  0.000000
2 P  1.686037  0.000000
3 H  2.150638  1.435090  0.000000
4 O  1.149791  2.833715  3.143727  0.000000
Interatomic angles:
C1-P2-H3= 86.7191  P2-C1-O4=175.494  H3-C1-O4=142.7322
H3-P2-O4= 88.5458
Dihedral angles:
O4-C1-P2-H3= 180.

```

Internal coordinates for the vibr. average structure at 298.15K (Sa)

```

Interatomic distances:
      1      2      3      4
1 C  0.000000
2 P  1.686185  0.000000
3 H  2.149863  1.433278  0.000000
4 O  1.148659  2.832719  3.142420  0.000000
Interatomic angles:
C1-P2-H3= 86.7314  P2-C1-O4=175.4817  H3-C1-O4=142.79
H3-P2-O4= 88.562
Dihedral angles:
O4-C1-P2-H3= 180.

```

=====  
Vibrational Average of Electric-Field Properties  
=====

Electric dipole

```

-----
-----

```

Property at reference geometry, Unit: Debye

X= -0.6671 Y= -0.3867 Z= 0.0000

Temperature: 0K, Unit: Debye

X= -0.6548 Y= -0.4050 Z= 0.0000

Temperature: 298K, Unit: Debye

X= -0.6546 Y= -0.4050 Z= 0.0000

=====  
Nuclear Magnetic Resonance Spectroscopy  
=====

Nuclear quadrupole tensors

-----  
Property at reference geometry

Nuclear Quadrupole in Principal Axis System

| Atom        | a.u.    | MegaHertz | Gauss   | 10(-4) cm-1 | Axes                  |
|-------------|---------|-----------|---------|-------------|-----------------------|
| Baa         | -0.4455 | -59.777   | -21.330 | -19.939     | 0.9993 -0.0367 0.0000 |
| 1 C(13) Bbb | -0.1044 | -14.005   | -4.997  | -4.672      | 0.0000 0.0000 1.0000  |
| Bcc         | 0.5498  | 73.782    | 26.327  | 24.611      | 0.0367 0.9993 0.0000  |

|             |         |          |         |         |                       |
|-------------|---------|----------|---------|---------|-----------------------|
| Baa         | -1.2466 | -269.488 | -96.160 | -89.891 | 0.4565 0.8897 0.0000  |
| 2 P(31) Bbb | 0.1676  | 36.228   | 12.927  | 12.084  | 0.8897 -0.4565 0.0000 |
| Bcc         | 1.0790  | 233.259  | 83.233  | 77.807  | 0.0000 0.0000 1.0000  |

|            |         |         |        |        |                       |
|------------|---------|---------|--------|--------|-----------------------|
| Baa        | -0.1838 | -15.052 | -5.371 | -5.021 | 0.9999 0.0139 0.0000  |
| 3 H(2) Bbb | 0.0784  | 6.418   | 2.290  | 2.141  | -0.0139 0.9999 0.0000 |
| Bcc        | 0.1054  | 8.633   | 3.081  | 2.880  | 0.0000 0.0000 1.0000  |

|             |         |         |         |         |                       |
|-------------|---------|---------|---------|---------|-----------------------|
| Baa         | -0.5889 | 42.613  | 15.205  | 14.214  | 0.9999 0.0110 0.0000  |
| 4 O(17) Bbb | -0.0412 | 2.980   | 1.063   | 0.994   | -0.0110 0.9999 0.0000 |
| Bcc         | 0.6301  | -45.592 | -16.268 | -15.208 | 0.0000 0.0000 1.0000  |

-----  
Temperature: 0K

Nuclear Quadrupole in Principal Axis System

| Atom        | a.u.    | MegaHertz | Gauss   | 10(-4) cm-1 | Axes                   |
|-------------|---------|-----------|---------|-------------|------------------------|
| Baa         | -0.4414 | -59.232   | -21.135 | -19.758     | 0.9994 -0.0345 -0.0001 |
| 1 C(13) Bbb | -0.1018 | -13.667   | -4.877  | -4.559      | 0.0001 0.0000 1.0000   |
| Bcc         | 0.5432  | 72.899    | 26.012  | 24.316      | 0.0345 0.9994 0.0000   |

|             |         |          |         |         |                       |
|-------------|---------|----------|---------|---------|-----------------------|
| Baa         | -1.2237 | -264.534 | -94.392 | -88.239 | 0.4605 0.8877 0.0000  |
| 2 P(31) Bbb | 0.1341  | 28.996   | 10.347  | 9.672   | 0.8877 -0.4605 0.0000 |
| Bcc         | 1.0895  | 235.538  | 84.046  | 78.567  | 0.0000 0.0000 1.0000  |

|            |         |         |        |        |                       |
|------------|---------|---------|--------|--------|-----------------------|
| Baa        | -0.1790 | -14.662 | -5.232 | -4.891 | 0.9999 0.0123 0.0000  |
| 3 H(2) Bbb | 0.0753  | 6.167   | 2.201  | 2.057  | -0.0123 0.9999 0.0000 |
| Bcc        | 0.1037  | 8.495   | 3.031  | 2.834  | 0.0000 0.0000 1.0000  |

|             |         |         |         |         |                       |
|-------------|---------|---------|---------|---------|-----------------------|
| Baa         | -0.5843 | 42.278  | 15.086  | 14.102  | 0.9999 0.0123 -0.0001 |
| 4 O(17) Bbb | -0.0439 | 3.176   | 1.133   | 1.059   | -0.0123 0.9999 0.0000 |
| Bcc         | 0.6282  | -45.454 | -16.219 | -15.162 | 0.0001 0.0000 1.0000  |

-----  
Temperature: 298K

Nuclear Quadrupole in Principal Axis System

| Atom        | a.u.    | MegaHertz | Gauss   | 10(-4) cm-1 | Axes                   |
|-------------|---------|-----------|---------|-------------|------------------------|
| Baa         | -0.4403 | -59.080   | -21.081 | -19.707     | 0.9994 -0.0344 -0.0001 |
| 1 C(13) Bbb | -0.1017 | -13.650   | -4.871  | -4.553      | 0.0001 0.0000 1.0000   |
| Bcc         | 0.5420  | 72.730    | 25.952  | 24.260      | 0.0344 0.9994 0.0000   |

Baa -1.2180 -263.313 -93.957 -87.832 0.4594 0.8882 0.0000  
 2 P(31) Bbb 0.1296 28.010 9.995 9.343 0.8882 -0.4594 0.0001  
 Bcc 1.0884 235.303 83.962 78.489 0.0000 0.0000 1.0000

Baa -0.1782 -14.591 -5.206 -4.867 0.9999 0.0129 0.0000  
 3 H(2) Bbb 0.0745 6.104 2.178 2.036 -0.0129 0.9999 0.0000  
 Bcc 0.1036 8.488 3.029 2.831 0.0000 0.0000 1.0000

Baa -0.5850 42.327 15.103 14.119 0.9999 0.0105 -0.0001  
 4 O(17) Bbb -0.0402 2.906 1.037 0.969 -0.0105 0.9999 0.0000  
 Bcc 0.6251 -45.232 -16.140 -15.088 0.0001 0.0000 1.0000

=====  
 Resonance Analysis  
 =====

Thresholds  
 -----

Maximum Difference PT2 vs. Variational (cm-1) : 1.000  
 Minimum value for Darling-Dennison term (cm-1): 10.000

Fermi resonances  
 -----

| I | J + K | Freq.Diff. | Reduced Cubic Const. | PT2-Variat.Diff. |
|---|-------|------------|----------------------|------------------|
| 4 | 5 5   | -12.431    | -35.272              | -3.148           |

1 Active Fermi resonances over 1

Darling-Dennison resonances  
 -----

No Darling-Dennison resonance found

=====  
 Anharmonic X Matrix  
 =====

PT2 model: Deperturbed VPT2 (DVPT2)  
 Ref.: V. Barone, J. Chem. Phys. 122, 1, 014108 (2005)

Coriolis contributions to X Matrix (in cm<sup>-1</sup>)  
 -----

|   | 1            | 2            | 3            | 4            | 5            |
|---|--------------|--------------|--------------|--------------|--------------|
| 1 | 0.000000D+00 |              |              |              |              |
| 2 | 0.000000D+00 | 0.000000D+00 |              |              |              |
| 3 | 0.741427D-01 | 0.109373D+00 | 0.000000D+00 |              |              |
| 4 | 0.159505D+00 | 0.148318D+00 | 0.324756D-01 | 0.000000D+00 |              |
| 5 | 0.617226D+00 | 0.405093D+00 | 0.129903D-03 | 0.520670D-03 | 0.000000D+00 |
| 6 | 0.844795D+00 | 0.270615D-01 | 0.161729D+01 | 0.291742D+01 | 0.479159D+01 |
| 6 | 0.000000D+00 |              |              |              |              |

3rd Deriv. contributions to X Matrix (in cm<sup>-1</sup>)  
 -----

|   | 1             | 2             | 3             | 4             | 5             |
|---|---------------|---------------|---------------|---------------|---------------|
| 1 | -0.232485D+02 |               |               |               |               |
| 2 | -0.764224D+00 | -0.469258D+02 |               |               |               |
| 3 | -0.834599D+00 | 0.796081D+01  | -0.444914D+01 |               |               |
| 4 | 0.313163D+01  | 0.364128D+01  | -0.557813D+01 | -0.723107D+00 |               |
| 5 | 0.254078D+02  | 0.409471D+02  | -0.380826D+01 | -0.103212D+02 | -0.143773D+02 |
| 6 | 0.299406D+02  | -0.589695D-01 | -0.217509D+01 | -0.181376D+01 | -0.927582D+01 |
| 6 | -0.828542D+01 |               |               |               |               |

4th Deriv. contributions to X Matrix (in cm<sup>-1</sup>)  
 -----

|   | 1 | 2 | 3 | 4 | 5 |
|---|---|---|---|---|---|
| 1 |   |   |   |   |   |
| 2 |   |   |   |   |   |
| 3 |   |   |   |   |   |
| 4 |   |   |   |   |   |
| 5 |   |   |   |   |   |

1 0.120649D+02  
 2 -0.495610D-01 0.373357D+02  
 3 -0.507890D+00 -0.873211D+01 0.647246D+00  
 4 -0.646607D+01 -0.101559D+02 0.239038D+01 -0.105010D+01  
 5 -0.291802D+02 -0.390929D+02 0.391662D+01 0.451613D+01 0.130077D+02  
 6 -0.363710D+02 -0.923961D-01 -0.255410D+01 -0.180181D+00 0.986822D+01  
 6  
 6 0.914529D+01

Total Anharmonic X Matrix (in cm<sup>-1</sup>)

```

-----
      1      2      3      4      5
1 -0.111836D+02
2 -0.813785D+00 -0.959016D+01
3 -0.126835D+01 -0.661921D+00 -0.380190D+01
4 -0.317493D+01 -0.636634D+01 -0.315528D+01 -0.177321D+01
5 -0.315518D+01 0.225933D+01 0.108496D+00 -0.580453D+01 -0.136956D+01
6 -0.558563D+01 -0.124304D+00 -0.311190D+01 0.923476D+00 0.538399D+01
  6
6 0.859871D+00
  
```

=====  
 Deperturbed terms for anharmonicity  
 =====

Deperturbed terms in FMat (Fermi Resonances)

```

-----
      4      5 5
0.66546D+03 -0.88181D+01 0.68080D+03
  
```

Vibrational Energies (cm<sup>-1</sup>)

```

-----
Mode(Quanta) E(depert.) E(after diag.)
4(1)      665.460   661.443
5(2)      680.801   684.818
  
```

=====  
 Anharmonic Zero Point Energy  
 =====

Anharmonic Zero Point Energy

```

-----
Harmonic      : cm-1 = 3050.22227 ; Kcal/mol = 8.721 ; KJ/mol = 36.489
Anharm.Pot.   : cm-1 = -13.22606 ; Kcal/mol = -0.038 ; KJ/mol = -0.158
Watson+Coriolis: cm-1 = -0.70465 ; Kcal/mol = -0.002 ; KJ/mol = -0.008
XOF (Im. Freq.): cm-1 = 0.00000 ; Kcal/mol = 0.000 ; KJ/mol = 0.000
Total Anharm  : cm-1 = 3036.29156 ; Kcal/mol = 8.681 ; KJ/mol = 36.322
  
```

=====  
 Vibrational Energies at Anharmonic Level  
 =====

Vibrational Energies and Rotational Constants (in cm<sup>-1</sup>)

```

-----
Mode(Quanta) E(harm) E(anharm) Aa(z) Ba(x) Ca(y)
Equilibrium Geometry      4.376534 0.183879 0.176464
Ground State 3050.222 3036.292 4.361391 0.183571 0.175871
Fundamental Bands (DE w.r.t. Ground State)
1(1) active 2124.686 2095.320 4.359819 0.182599 0.174975
2(1) active 1720.887 1698.853 4.270256 0.183602 0.175769
3(1) active 761.269 749.621 4.417123 0.183035 0.175418
4(1) active 677.795 661.443 4.483919 0.183597 0.175567
5(1) active 345.113 341.770 4.086609 0.184216 0.176091
6(1) active 470.694 471.157 4.520334 0.183764 0.176225
Overtones (DE w.r.t. Ground State)
1(2)      4249.372 4168.273 4.358247 0.181627 0.174079
2(2)      3441.773 3378.525 4.179121 0.183632 0.175667
  
```

|      |          |          |          |          |          |
|------|----------|----------|----------|----------|----------|
| 3(2) | 1522.539 | 1491.638 | 4.472854 | 0.182499 | 0.174964 |
| 4(2) | 1355.590 | 1327.373 | 4.606447 | 0.183624 | 0.175262 |
| 5(2) | 690.226  | 684.818  | 3.811827 | 0.184860 | 0.176310 |
| 6(2) | 941.389  | 944.033  | 4.679277 | 0.183957 | 0.176578 |

Combination Bands (DE w.r.t. Ground State)

|      |      |          |          |          |          |          |
|------|------|----------|----------|----------|----------|----------|
| 2(1) | 1(1) | 3845.573 | 3793.359 | 4.268684 | 0.182629 | 0.174873 |
| 3(1) | 1(1) | 2885.955 | 2843.673 | 4.415551 | 0.182063 | 0.174521 |
| 3(1) | 2(1) | 2482.156 | 2447.812 | 4.325987 | 0.183065 | 0.175316 |
| 4(1) | 1(1) | 2802.481 | 2757.605 | 4.482347 | 0.182625 | 0.174670 |
| 4(1) | 2(1) | 2398.682 | 2357.946 | 4.392784 | 0.183628 | 0.175465 |
| 4(1) | 3(1) | 1439.064 | 1411.926 | 4.539651 | 0.183061 | 0.175113 |
| 5(1) | 1(1) | 2469.799 | 2433.935 | 4.085037 | 0.183243 | 0.175194 |
| 5(1) | 2(1) | 2066.000 | 2042.882 | 3.995474 | 0.184246 | 0.175989 |
| 5(1) | 3(1) | 1106.382 | 1091.499 | 4.142341 | 0.183679 | 0.175637 |
| 5(1) | 4(1) | 1022.908 | 1001.425 | 4.209137 | 0.184242 | 0.175786 |
| 6(1) | 1(1) | 2595.380 | 2560.891 | 4.518762 | 0.182792 | 0.175328 |
| 6(1) | 2(1) | 2191.581 | 2169.885 | 4.429199 | 0.183795 | 0.176122 |
| 6(1) | 3(1) | 1231.964 | 1217.666 | 4.576066 | 0.183228 | 0.175771 |
| 6(1) | 4(1) | 1148.489 | 1137.540 | 4.642862 | 0.183791 | 0.175920 |
| 6(1) | 5(1) | 815.807  | 818.311  | 4.245552 | 0.184409 | 0.176444 |

Fundamental Bands

| Mode(Quanta) | E(harm)  | E(anharm) | I(harm)      | I(anharm)    |
|--------------|----------|-----------|--------------|--------------|
| 1(1)         | 2124.686 | 2095.320  | 707.59437296 | 683.21702311 |
| 2(1)         | 1720.887 | 1698.853  | 7.72098939   | 8.08585516   |
| 3(1)         | 761.269  | 749.621   | 2.06939703   | 1.87600731   |
| 4(1)         | 677.795  | 661.443   | 9.51484366   | 9.25582879   |
| 5(1)         | 345.113  | 341.770   | 7.05123387   | 6.75066349   |
| 6(1)         | 470.694  | 471.157   | 0.21359226   | 0.19114589   |

Overtones

| Mode(Quanta) | E(harm)  | E(anharm) | I(anharm)  |
|--------------|----------|-----------|------------|
| 1(2)         | 4249.372 | 4168.273  | 5.89113341 |
| 2(2)         | 3441.773 | 3378.525  | 0.00753993 |
| 3(2)         | 1522.539 | 1491.638  | 0.39553377 |
| 4(2)         | 1355.590 | 1327.373  | 0.08960907 |
| 5(2)         | 690.226  | 684.818   | 0.03201394 |
| 6(2)         | 941.389  | 944.033   | 0.58339411 |

Combination Bands

| Mode(Quanta) | E(harm) | E(anharm) | I(anharm) |            |
|--------------|---------|-----------|-----------|------------|
| 2(1)         | 1(1)    | 3845.573  | 3793.359  | 0.22451524 |
| 3(1)         | 1(1)    | 2885.955  | 2843.673  | 3.68530025 |
| 3(1)         | 2(1)    | 2482.156  | 2447.812  | 0.07897302 |
| 4(1)         | 1(1)    | 2802.481  | 2757.605  | 1.41992537 |
| 4(1)         | 2(1)    | 2398.682  | 2357.946  | 0.21123331 |
| 4(1)         | 3(1)    | 1439.064  | 1411.926  | 0.12877370 |
| 5(1)         | 1(1)    | 2469.799  | 2433.935  | 0.01784993 |
| 5(1)         | 2(1)    | 2066.000  | 2042.882  | 0.16755293 |
| 5(1)         | 3(1)    | 1106.382  | 1091.499  | 0.88171421 |
| 5(1)         | 4(1)    | 1022.908  | 1001.425  | 1.30351877 |
| 6(1)         | 1(1)    | 2595.380  | 2560.891  | 0.00125199 |
| 6(1)         | 2(1)    | 2191.581  | 2169.885  | 0.00140216 |
| 6(1)         | 3(1)    | 1231.964  | 1217.666  | 0.01310488 |
| 6(1)         | 4(1)    | 1148.489  | 1137.540  | 0.03173962 |
| 6(1)         | 5(1)    | 815.807   | 818.311   | 0.00209583 |

### 3.2 Isomers of HPCO

**Table S1.** Computed isomers of HPCO.

| monomer | a.u.<br>E    | kJ<br>$\Delta E$ | ppm<br>$^{31}\text{P}$ | ppm<br>$^1\text{H}$ |
|---------|--------------|------------------|------------------------|---------------------|
| HPCO    | -455.0317333 | 0.0              | -310                   | 1.8                 |
| PCOH    | -454.9982745 | 87.8             | -245                   | 4.5                 |
| PC(H)O  | -454.9067496 | 328.1            | +858                   | 12.4                |

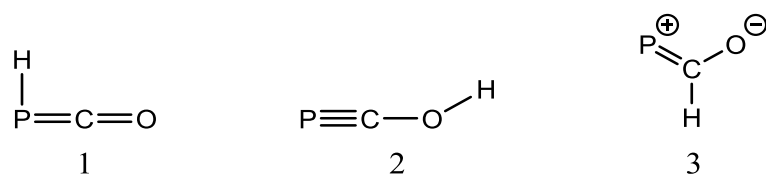

**Figure S34.** Computed isomers of HPCO.

```

1_01
0 1
C      -0.99173548  0.10051244 -0.00004274
P      -2.62770635 -0.15755215  0.00059353
H      -3.24369053  0.86098386  0.63749845
O      -0.22142652  1.30530456 -0.00020426
  
```

```

1_02
0 1
C      -0.99173548  0.10051244 -0.00004274
P      -2.62770635 -0.15755215  0.00059353
O      -0.22142652  1.30530456 -0.00020426
H       0.71350511  1.08735309 -0.00017504
  
```

```

1_03
0 1
C       0.00000000  0.89334000  0.00000000
O       1.16218400  0.32462700  0.00000000
P      -0.60769600 -0.66192100  0.00000000
H      -0.18204200  1.97175900  0.00000000
  
```

### 3.3 Isomers of (HPCO)<sub>2</sub>

**Table S2.** Computed isomers of (HPCO)<sub>2</sub>. Isomers with a suitable coupling pattern (number of multiplets due to <sup>1</sup>J<sub>P-H</sub> coupling) are shown in bold.

| dimer     | energy [a.u.]         | rel. E [kJ mol <sup>-1</sup> ] | δ( <sup>31</sup> P) | δ ( <sup>31</sup> P) |
|-----------|-----------------------|--------------------------------|---------------------|----------------------|
|           | -910.089692288        |                                |                     |                      |
| 1         | -910.079870700        | 25.8                           | 172                 | 172                  |
| 2         | -910.079272490        | 27.4                           | 155                 | 155                  |
| <b>3</b>  | <b>-910.075835700</b> | <b>36.4</b>                    | <b>101</b>          | <b>367</b>           |
| 4         | -910.045414150        | 116.3                          | 177                 | 177                  |
| 5         | -910.045379637        | 116.3                          | 71                  | 129                  |
| 6         | -910.071516941        | 47.7                           | 23                  | 112                  |
| <b>7</b>  | <b>-910.046679684</b> | <b>112.9</b>                   | <b>84</b>           | <b>174</b>           |
| 8         | -910.062443388        | 71.5                           | 87                  | 283                  |
| <b>9</b>  | <b>-910.046917064</b> | <b>112.3</b>                   | <b>158</b>          | <b>415</b>           |
| 10        | -910.028743625        | 160.0                          | -47                 | -47                  |
| 11        | -910.039732055        | 131.2                          | 148                 | 148                  |
| 12        | -910.085548158        | 10.9                           | -35                 | -35                  |
| 13        | -910.089692288        | 0.0                            | -20                 | -20                  |
| <b>14</b> | <b>-910.071515472</b> | <b>47.7</b>                    | <b>-11</b>          | <b>83</b>            |
| <b>15</b> | <b>-910.021492230</b> | <b>179.1</b>                   | <b>12</b>           | <b>783</b>           |
| 16        | -909.938939441        | 395.8                          | 51                  | 66                   |
| 17        | -909.901606526        | 493.8                          | -43                 | -43                  |
| 18        | -909.899599633        | 499.1                          | -60                 | -1                   |
| 19        | -909.983347118        | 279.2                          | 148                 | 260                  |
| 20        | -909.989131436        | 264.0                          | 148                 | 148                  |



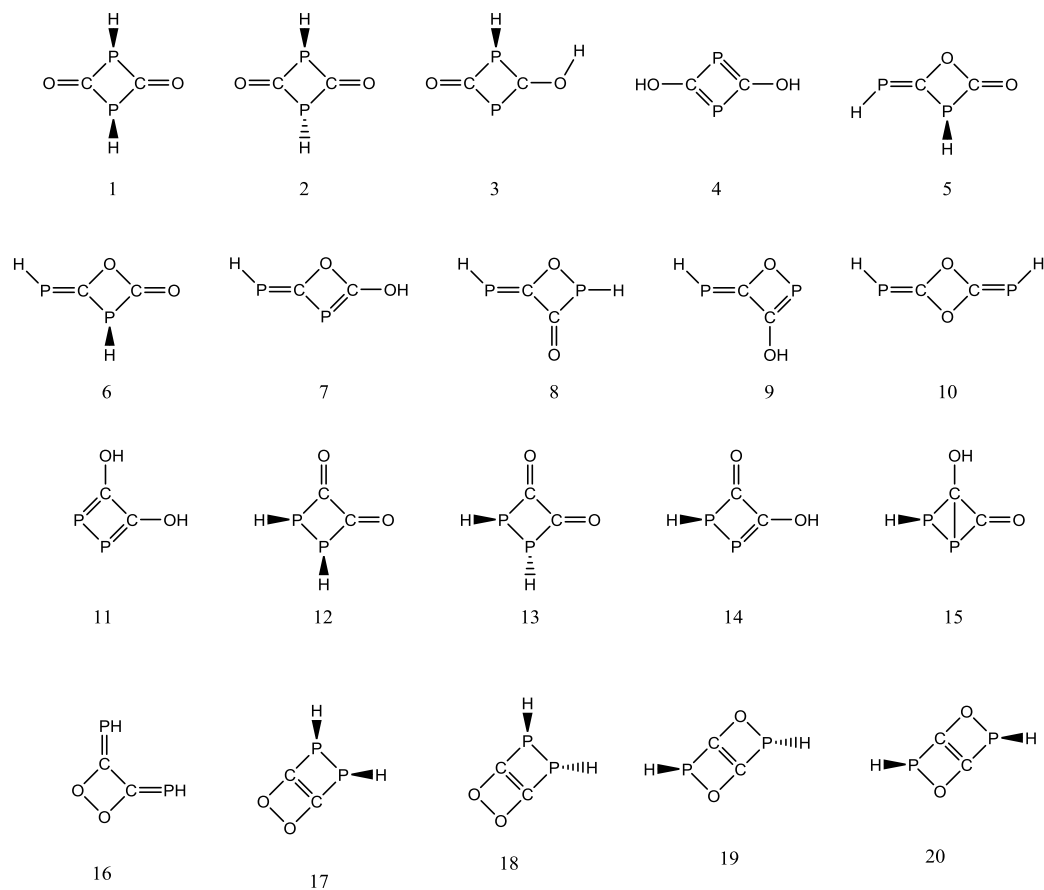

**Figure S35.** Computed isomers of  $(\text{HPCO})_2$ .

|      |             |             |             |
|------|-------------|-------------|-------------|
| 2_01 |             |             |             |
| 0 1  |             |             |             |
| C    | 1.07666700  | 0.03208700  | -0.00052000 |
| C    | -1.07636800 | -0.03185600 | -0.00002500 |
| P    | -0.13679400 | 1.43767300  | -0.00022200 |
| P    | 0.13669500  | -1.43740200 | -0.00022900 |
| O    | -2.36968500 | -0.23586900 | 0.00047800  |
| O    | 2.36972300  | 0.23530400  | 0.00058500  |
| H    | -2.84600300 | 0.60538500  | 0.00056800  |
| H    | 2.84538100  | -0.60630600 | 0.00098200  |
| 2_02 |             |             |             |
| 0 1  |             |             |             |
| C    | -1.25692900 | -0.05486000 | -0.00082200 |
| C    | 1.03260700  | -0.09026400 | 0.01664200  |
| P    | -0.02520300 | -1.44540800 | -0.04311600 |
| P    | -0.01795000 | 1.41995800  | -0.14454500 |
| H    | -0.02030400 | 1.80937300  | 1.23148300  |
| O    | 2.35226700  | -0.13593700 | 0.08445100  |
| O    | -2.44165400 | -0.02728100 | 0.09542200  |
| H    | 2.72863100  | 0.74885600  | 0.04953700  |
| 2_03 |             |             |             |
| 0 1  |             |             |             |
| C    | -1.20619300 | 0.00011400  | 0.03212700  |
| C    | 1.20625700  | -0.00012200 | 0.03219800  |
| P    | -0.00018000 | -1.45012300 | -0.23497000 |
| H    | -0.00037700 | -1.88373700 | 1.11867600  |
| P    | 0.00012400  | 1.45012500  | -0.23497100 |
| H    | 0.00031900  | 1.88381200  | 1.11865100  |
| O    | 2.36751200  | -0.00016800 | 0.27659400  |
| O    | -2.36744800 | 0.00016000  | 0.27663600  |
| 2_04 |             |             |             |
| 0 1  |             |             |             |
| C    | 1.07754400  | 0.03509600  | 0.00010200  |
| C    | -1.07753000 | -0.03507000 | 0.00007200  |
| P    | -0.13513500 | 1.44323200  | 0.00025100  |
| P    | 0.13509200  | -1.44317200 | 0.00025100  |
| O    | -2.37249000 | -0.23387500 | -0.00037700 |
| O    | 2.37256300  | 0.23376300  | -0.00038600 |
| H    | 2.84841200  | -0.61088000 | -0.00124200 |
| H    | -2.84843300 | 0.61071200  | -0.00123700 |
| 2_05 |             |             |             |
| 0 1  |             |             |             |
| C    | 1.30579100  | 0.22718000  | -0.00003100 |
| C    | -0.67529600 | -0.01556100 | -0.00011700 |
| P    | 0.57943200  | -1.35143400 | -0.00001700 |
| O    | 2.47349700  | 0.81721700  | 0.00017400  |
| H    | 3.16850700  | 0.15099000  | -0.00011000 |
| P    | -2.34325600 | 0.14963500  | 0.00008900  |
| H    | -2.30230100 | 1.57723200  | -0.00012300 |
| O    | 0.25252600  | 1.06141400  | -0.00016900 |
| 2_06 |             |             |             |
| 0 1  |             |             |             |
| C    | -1.45502200 | 0.35503200  | -0.01108100 |
| C    | 0.63921100  | 0.05315700  | -0.00252900 |
| O    | -2.54243100 | 0.80317800  | 0.02368400  |
| P    | 2.31181300  | 0.14847200  | 0.00857900  |
| H    | 2.34193200  | 1.57525700  | 0.04925600  |
| O    | -0.27757200 | 1.09110800  | -0.01720900 |
| P    | -0.59088800 | -1.32493600 | -0.09706400 |
| H    | -0.70092000 | -1.53172700 | 1.30787300  |
| 2_07 |             |             |             |
| 0 1  |             |             |             |
| O    | -0.26848400 | 1.06468800  | -0.00055300 |
| C    | 0.67597500  | -0.00642200 | -0.00055100 |
| P    | 2.31803900  | 0.33440700  | 0.00029300  |
| H    | 2.67293200  | -1.04589200 | 0.00003000  |
| O    | -2.48351300 | 0.79675300  | 0.00050100  |
| H    | -3.16973400 | 0.12162700  | 0.00005700  |

|      |             |             |             |
|------|-------------|-------------|-------------|
| C    | -1.30851300 | 0.22205300  | -0.00010500 |
| P    | -0.56417200 | -1.35181000 | -0.00000900 |
| 2_08 |             |             |             |
| O    |             |             |             |
| O    | 0.34100500  | -1.29531400 | 0.08112100  |
| C    | -0.51227600 | -0.23677400 | 0.03619600  |
| P    | -2.19787400 | -0.28952100 | -0.03418200 |
| H    | -2.25946100 | 1.13511100  | -0.04133700 |
| P    | 1.84726800  | -0.44387100 | 0.04507700  |
| C    | 0.47231800  | 0.89712000  | 0.03038000  |
| O    | 0.37943300  | 2.07888300  | 0.02557900  |
| H    | 1.99479200  | -0.36485000 | -1.37514600 |
| 2_09 |             |             |             |
| O    |             |             |             |
| O    | 0.24759400  | -1.43211700 | 0.00036100  |
| C    | -0.47426500 | -0.26465200 | 0.00014900  |
| P    | -2.16098300 | -0.18064400 | -0.00016300 |
| H    | -2.14366400 | 1.24520900  | 0.00018700  |
| P    | 1.77103700  | -0.55322700 | -0.00019600 |
| C    | 0.61459800  | 0.69907100  | 0.00006000  |
| O    | 0.47848600  | 2.02129400  | 0.00023300  |
| H    | 1.34222200  | 2.44293000  | -0.00080200 |
| 2_10 |             |             |             |
| O    |             |             |             |
| O    | -0.00905400 | 0.99966500  | 0.00006800  |
| O    | 0.00907700  | -0.99974100 | 0.00002100  |
| C    | -0.93958600 | -0.00601200 | 0.00002900  |
| C    | 0.93959800  | 0.00591900  | 0.00003700  |
| P    | 2.61933000  | 0.09228700  | -0.00004100 |
| H    | 2.69735600  | -1.32933400 | 0.00004400  |
| P    | -2.61935900 | -0.09221400 | -0.00002200 |
| H    | -2.69717400 | 1.32940800  | -0.00021700 |
| 2_11 |             |             |             |
| O    |             |             |             |
| C    | -0.45505600 | -0.73709500 | -0.00039000 |
| C    | -0.45367600 | 0.73792700  | 0.00038800  |
| O    | -1.56954700 | 1.48874100  | -0.00823700 |
| O    | -1.57232500 | -1.48588600 | 0.00808800  |
| P    | 1.17198500  | 1.21357000  | 0.03178500  |
| P    | 1.16968000  | -1.21565800 | -0.03177200 |
| H    | -2.26802200 | 1.01663300  | -0.47598200 |
| H    | -2.26958700 | -1.01313800 | 0.47699000  |
| 2_12 |             |             |             |
| O    |             |             |             |
| C    | -0.75563800 | 0.79418100  | -0.04264200 |
| C    | -0.77043900 | -0.78094400 | -0.04607100 |
| H    | 1.12997100  | -1.38958400 | 1.32691100  |
| O    | -1.70501100 | -1.50398100 | 0.01168400  |
| O    | -1.67541400 | 1.53420300  | 0.03547100  |
| P    | 1.11972600  | -1.13367100 | -0.07339000 |
| P    | 1.14007400  | 1.11196900  | -0.09160300 |
| H    | 1.17289000  | 1.39392400  | 1.30301300  |
| 2_13 |             |             |             |
| O    |             |             |             |
| C    | 0.76779000  | 0.79053800  | 0.00255800  |
| C    | 0.76747600  | -0.79093700 | -0.00220100 |
| H    | -1.26622500 | -1.45503300 | -1.20933700 |
| O    | 1.69181800  | -1.52461400 | -0.07245400 |
| O    | 1.69240700  | 1.52392600  | 0.07229500  |
| P    | -1.12543700 | -1.10031000 | 0.16071500  |
| P    | -1.12480000 | 1.10081600  | -0.16077600 |
| H    | -1.26562300 | 1.45532600  | 1.20937100  |
| 2_14 |             |             |             |
| O    |             |             |             |
| C    | 0.82590600  | -0.43625300 | -0.02825200 |
| C    | 0.27548500  | 0.93218900  | -0.00748600 |
| H    | -1.87791600 | 0.79588000  | 1.21696200  |
| O    | 0.88951900  | 1.95881200  | 0.09386900  |

|      |             |             |             |
|------|-------------|-------------|-------------|
| O    | 2.12919200  | -0.67365900 | -0.06343600 |
| P    | -1.57345700 | 0.52596500  | -0.15158000 |
| P    | -0.52353000 | -1.47524100 | 0.07258500  |
| H    | 2.57469200  | 0.18641000  | -0.06108600 |
| 2_15 |             |             |             |
| O 1  |             |             |             |
| C    | 1.47390500  | 0.84946600  | -0.00323200 |
| C    | 1.00629200  | -0.39621400 | 0.01991800  |
| H    | -0.71647500 | -2.08955900 | -0.25619400 |
| O    | 1.87460800  | -1.46888500 | -0.03293800 |
| H    | 1.99950600  | -1.79441200 | 0.86379500  |
| O    | 1.83899000  | 1.94122300  | -0.02835800 |
| P    | -0.76879800 | -0.68151200 | -0.06965700 |
| P    | -2.28940100 | 0.50722900  | 0.05516800  |
| 2_16 |             |             |             |
| O 1  |             |             |             |
| C    | -0.71706300 | 0.19145600  | 0.00008100  |
| C    | 0.73045200  | 0.20567900  | -0.00009500 |
| O    | -0.73782700 | 1.56749100  | 0.00017000  |
| O    | 0.71874900  | 1.58778800  | -0.00019900 |
| P    | 2.09577200  | -0.78803600 | 0.00008000  |
| P    | -1.97756700 | -0.92955300 | -0.00004600 |
| H    | 1.27353400  | -1.95196600 | -0.00036500 |
| H    | -2.97432300 | 0.09075300  | 0.00016900  |
| 2_17 |             |             |             |
| O 1  |             |             |             |
| C    | -0.57346200 | -0.66867700 | 0.38003700  |
| C    | -0.57255900 | 0.66846200  | 0.37901300  |
| H    | 1.66388900  | 1.48056500  | 1.11874200  |
| P    | 1.11861300  | 1.14244400  | -0.15381100 |
| O    | -1.87406500 | 0.73012800  | -0.13588800 |
| O    | -1.87522500 | -0.72891900 | -0.13480200 |
| P    | 1.11752700  | -1.14282900 | -0.15448700 |
| H    | 1.66445400  | -1.48316200 | 1.11694600  |
| 2_18 |             |             |             |
| O 1  |             |             |             |
| C    | -0.61740900 | -0.66476700 | 0.42715700  |
| C    | -0.53418600 | 0.66331600  | 0.33011200  |
| H    | 1.10720900  | 1.29666700  | -1.34198800 |
| P    | 1.23803500  | 1.10837500  | 0.06654300  |
| O    | -1.81335100 | 0.80309600  | -0.18903300 |
| O    | -1.92679200 | -0.65233500 | -0.09875000 |
| P    | 1.03561900  | -1.16492600 | -0.19410000 |
| H    | 1.61869300  | -1.64578600 | 1.01398100  |
| 2_19 |             |             |             |
| O 1  |             |             |             |
| C    | 0.05400300  | 0.65356200  | 0.44560000  |
| C    | -0.08169300 | -0.68660600 | 0.43686100  |
| H    | -2.60887200 | -0.64005700 | 0.76524400  |
| H    | 1.41873200  | 0.48291300  | -1.50730100 |
| P    | -1.71860900 | -0.36211400 | -0.31885300 |
| P    | 1.81216200  | 0.38264800  | -0.13635600 |
| O    | 1.16347000  | -1.21013200 | 0.12603500  |
| O    | -1.16934800 | 1.21605600  | 0.15839400  |
| 2_20 |             |             |             |
| O 1  |             |             |             |
| C    | 0.07245400  | 0.67313000  | 0.43132700  |
| C    | -0.07301100 | -0.67410500 | 0.43175900  |
| H    | -2.58051100 | -0.62828700 | 0.81999600  |
| H    | 2.57857600  | 0.62885400  | 0.82126500  |
| P    | -1.73106500 | -0.36242000 | -0.29902000 |
| P    | 1.73141300  | 0.36279100  | -0.29882700 |
| O    | 1.16344400  | -1.21749900 | 0.13405800  |
| O    | -1.16343700 | 1.21746400  | 0.13443400  |

### 3.4 Isomers of (HPCO)<sub>3</sub>

**Table S3.** Computed isomers of (HPCO)<sub>3</sub>. Isomers with a suitable coupling pattern (number of multiplets due to <sup>1</sup>J<sub>P-H</sub> coupling) are shown in bold.

| trimer    | energy [a.u.]         | rel. E<br>[kJ mol <sup>-1</sup> ] | δ( <sup>31</sup> P)<br>ppm | δ( <sup>31</sup> P)<br>ppm | δ( <sup>31</sup> P)<br>ppm |
|-----------|-----------------------|-----------------------------------|----------------------------|----------------------------|----------------------------|
| 1         | -1365.14456616        | 23.8                              | 140                        | 158                        | 178                        |
| 2         | -1365.12504082        | 75.0                              | 4                          | 184                        | 184                        |
| 3         | -1365.12944181        | 63.5                              | -32                        | 182                        | 182                        |
| 4         | -1365.13496085        | 49.0                              | 8                          | 23                         | 218                        |
| 5         | -1365.13496080        | 49.0                              | 8                          | 24                         | 218                        |
| 6         | -1365.13710403        | 43.4                              | 17                         | 49                         | 203                        |
| 7         | -1365.10657401        | 123.5                             | -81                        | 13                         | 69                         |
| 8         | -1365.13911130        | 38.1                              | -8                         | 1                          | 155                        |
| <b>9</b>  | <b>-1365.12601701</b> | <b>72.5</b>                       | <b>-92</b>                 | <b>71</b>                  | <b>176</b>                 |
| <b>10</b> | <b>-1365.12462676</b> | <b>76.1</b>                       | <b>-92</b>                 | <b>82</b>                  | <b>182</b>                 |
| <b>11</b> | <b>-1365.13883026</b> | <b>38.8</b>                       | <b>-85</b>                 | <b>114</b>                 | <b>124</b>                 |
| <b>12</b> | <b>-1365.13609998</b> | <b>46.0</b>                       | <b>-85</b>                 | <b>118</b>                 | <b>131</b>                 |
| <b>13</b> | <b>-1365.15361528</b> | <b>0.0</b>                        | <b>-80</b>                 | <b>82</b>                  | <b>173</b>                 |
| 14        | -1365.13961226        | 36.8                              | -110                       | 115                        | 298                        |
| 15        | -1365.13983020        | 36.2                              | -111                       | 148                        | 318                        |
| <b>16</b> | <b>-1365.13131840</b> | <b>58.5</b>                       | <b>-92</b>                 | <b>184</b>                 | <b>468</b>                 |
| 17        | -1365.12253762        | 81.6                              | 101                        | 259                        | 328                        |
| 18        | -1365.12467566        | 76.0                              | 95                         | 259                        | 325                        |
| 19        | -1365.12498118        | 75.2                              | 46                         | 243                        | 339                        |
| 20        | -1365.13077310        | 60.0                              | 149                        | 184                        | 397                        |
| <b>21</b> | <b>-1365.07164120</b> | <b>215.2</b>                      | <b>-75</b>                 | <b>223</b>                 | <b>246</b>                 |
| <b>22</b> | <b>-1365.06173429</b> | <b>241.2</b>                      | <b>-75</b>                 | <b>165</b>                 | <b>291</b>                 |
| <b>23</b> | <b>-1365.12918536</b> | <b>64.1</b>                       | <b>-110</b>                | <b>181</b>                 | <b>297</b>                 |
| 24        | -1365.12841380        | 66.2                              | 168                        | 168                        | 397                        |
| 25        | -1365.13221488        | 56.2                              | 157                        | 166                        | 367                        |
| <b>26</b> | <b>-1365.11422561</b> | <b>103.4</b>                      | <b>-85</b>                 | <b>-49</b>                 | <b>9</b>                   |
| 27        | -1365.11701760        | 96.1                              | -144                       | 41                         | 233                        |
| 28        | -1365.12141031        | 84.6                              | -118                       | 47                         | 106                        |
| <b>29</b> | <b>-1365.10320186</b> | <b>132.4</b>                      | <b>-135</b>                | <b>-88</b>                 | <b>324</b>                 |
| <b>30</b> | <b>-1365.11054578</b> | <b>113.1</b>                      | <b>-94</b>                 | <b>-43</b>                 | <b>180</b>                 |
| <b>31</b> | <b>-1365.07857380</b> | <b>197.0</b>                      | <b>-113</b>                | <b>403</b>                 | <b>417</b>                 |
| 32        | -1365.14515367        | 22.2                              | 73                         | 73                         | 73                         |
| 33        | -1365.14092327        | 33.3                              | 43                         | 43                         | 50                         |
| 34        | -1365.13814103        | 40.6                              | 5                          | 69                         | 69                         |

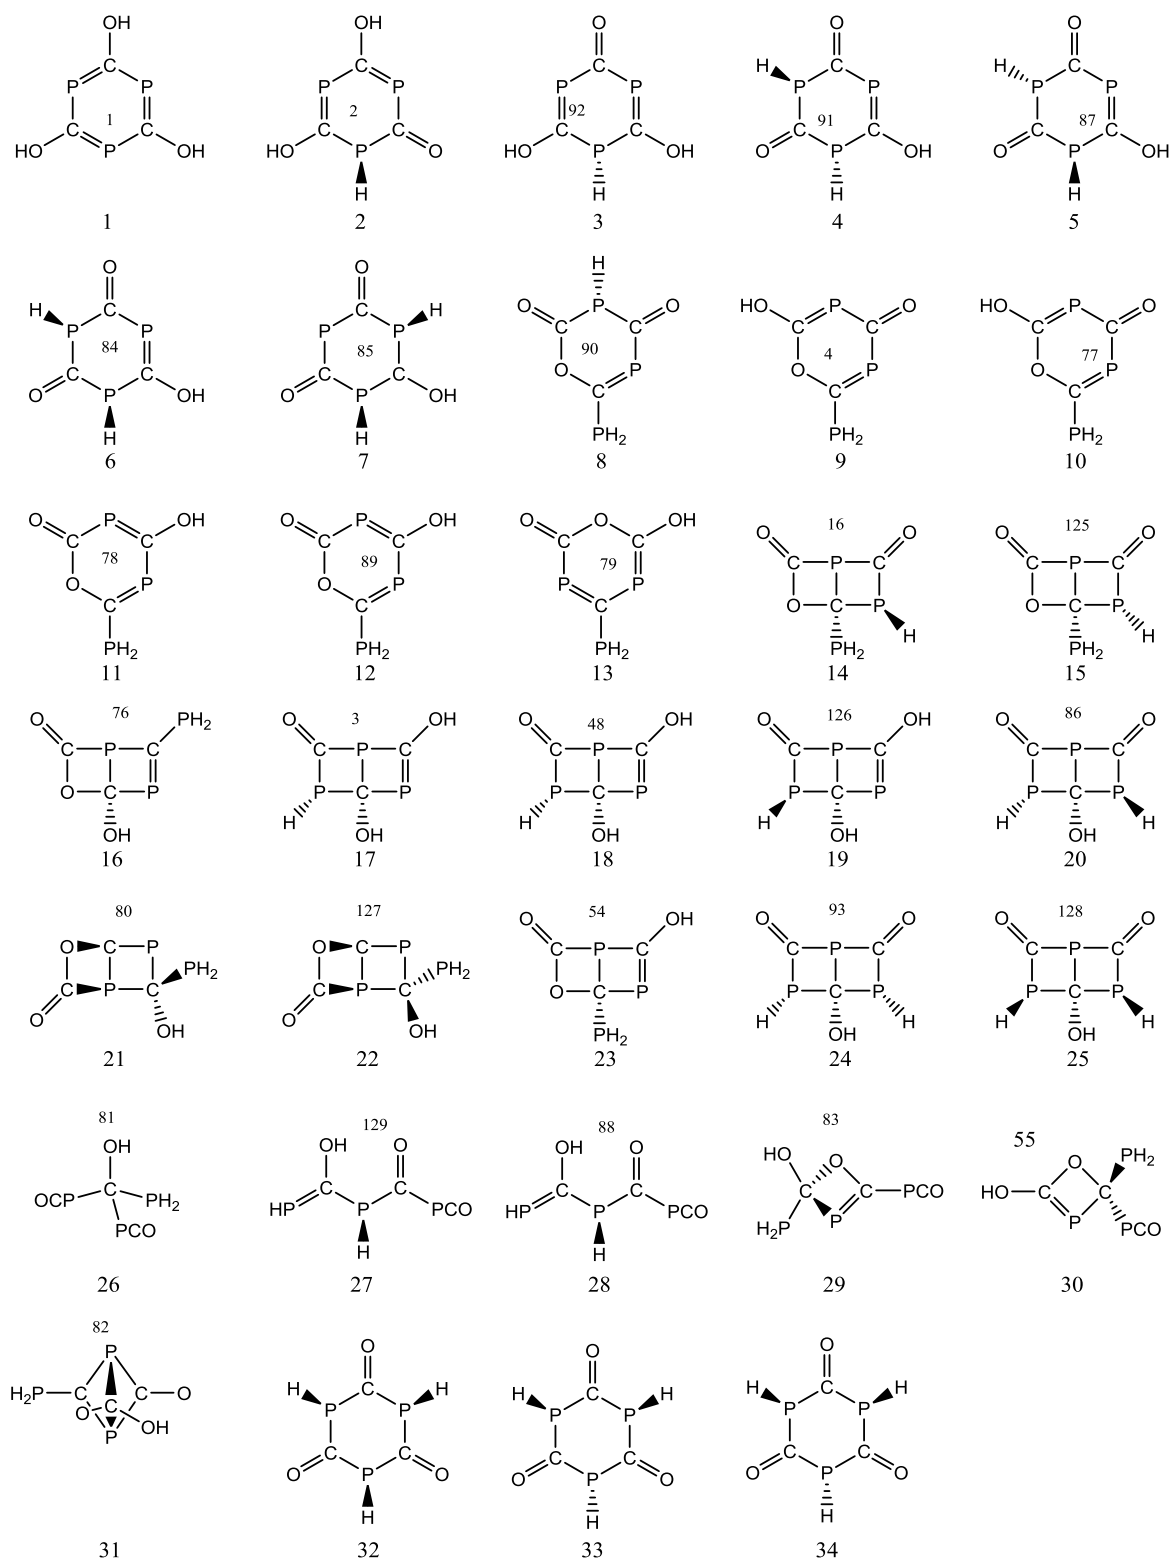

**Figure S36.** Computed isomers of  $(\text{HPCO})_3$ .

|      |             |             |             |
|------|-------------|-------------|-------------|
| 3_01 |             |             |             |
| 0 1  |             |             |             |
| C    | 1.49811000  | -0.52984100 | 0.00007000  |
| C    | -0.29473900 | 1.58434600  | 0.00023300  |
| C    | -1.19778000 | -1.06197900 | -0.00017900 |
| O    | -0.49416300 | 2.92485700  | 0.00037000  |
| O    | 2.76045800  | -1.02516900 | 0.00022900  |
| O    | -2.19293900 | -1.98259100 | -0.00037000 |
| P    | 0.35739900  | -1.86413200 | 0.00016000  |
| P    | 1.41492700  | 1.22186800  | -0.00076000 |
| P    | -1.74084600 | 0.60466200  | 0.00021800  |
| H    | 3.39830100  | -0.30118600 | 0.00283600  |
| H    | -1.43905500 | 3.11762700  | 0.00042500  |
| H    | -3.05182900 | -1.54433300 | -0.00011000 |
| 3_02 |             |             |             |
| 0 1  |             |             |             |
| C    | 1.34608500  | -0.78737200 | 0.06923300  |
| C    | -1.44282900 | -0.72132600 | -0.02770900 |
| C    | 0.16854200  | 1.70112000  | -0.16753900 |
| O    | -2.65813900 | -1.25516700 | -0.24406600 |
| O    | 2.41795700  | -1.59324700 | 0.23065300  |
| O    | 0.09073200  | 2.81886300  | -0.60454800 |
| P    | 1.79906500  | 0.87681400  | 0.03796900  |
| P    | -0.13464300 | -1.79333500 | -0.27499500 |
| P    | -1.37799200 | 0.96196000  | 0.62871300  |
| H    | -2.32509500 | 1.51344400  | -0.27907200 |
| H    | 2.14185500  | -2.51879600 | 0.23144200  |
| H    | -3.34839500 | -0.59434700 | -0.12790100 |
| 3_03 |             |             |             |
| 0 1  |             |             |             |
| C    | 0.00068600  | 1.71429100  | 0.12946100  |
| C    | -1.43427600 | -0.69286400 | -0.06591600 |
| C    | 1.43369900  | -0.69384400 | -0.06607800 |
| O    | -2.44975600 | -1.56585000 | -0.22369300 |
| O    | 0.00067700  | 2.86872300  | 0.48359500  |
| O    | 2.44886500  | -1.56717200 | -0.22372000 |
| P    | 1.67753500  | 0.97970500  | -0.24275900 |
| P    | -1.67678500 | 0.98065500  | -0.24317700 |
| P    | -0.00054500 | -1.63035800 | 0.55408900  |
| H    | 3.26286300  | -1.08655200 | -0.42229400 |
| H    | -0.00091200 | -2.62984900 | -0.45415500 |
| H    | -3.26398000 | -1.08474100 | -0.42008700 |
| 3_04 |             |             |             |
| 0 1  |             |             |             |
| C    | -0.45066100 | 1.60268100  | 0.21477500  |
| C    | -1.26188300 | -1.18985500 | -0.04711100 |
| C    | 1.53348300  | -0.31392900 | -0.09313900 |
| O    | -2.07602700 | -2.07289400 | -0.06399400 |
| O    | -0.79539100 | 2.58350800  | 0.81738800  |
| O    | 2.72171400  | -0.89060200 | -0.34855200 |
| P    | 1.35822200  | 1.38043100  | -0.21006500 |
| P    | -1.73379800 | 0.51918200  | -0.62384500 |
| P    | 0.43827000  | -1.59395000 | 0.62828100  |
| H    | 3.36264000  | -0.22026400 | -0.62071300 |
| H    | -2.75697700 | 0.68697000  | 0.34256000  |
| H    | 0.72593600  | -2.60513500 | -0.32329800 |
| 3_05 |             |             |             |
| 0 1  |             |             |             |
| C    | 0.45034300  | 1.60285100  | 0.21470900  |
| C    | 1.26204700  | -1.18974700 | -0.04703200 |
| C    | -1.53346800 | -0.31410300 | -0.09316200 |
| O    | 2.07634100  | -2.07265400 | -0.06374700 |
| O    | 0.79486500  | 2.58396400  | 0.81704000  |
| O    | -2.72163400 | -0.89094700 | -0.34839300 |
| P    | -1.35836000 | 1.38021700  | -0.20998400 |
| P    | 1.73381500  | 0.51938100  | -0.62367500 |
| P    | -0.43803500 | -1.59417500 | 0.62796500  |
| H    | -0.72530800 | -2.60510500 | -0.32401300 |

|      |             |             |             |
|------|-------------|-------------|-------------|
| H    | 2.75684900  | 0.68748600  | 0.34283700  |
| H    | -3.36295100 | -0.22063000 | -0.61971100 |
| 3_06 |             |             |             |
| 01   |             |             |             |
| C    | 1.16154600  | -1.27397100 | 0.03605400  |
| C    | 0.60243000  | 1.55933800  | 0.20333500  |
| C    | -1.53620000 | -0.35334900 | -0.02239200 |
| O    | 0.93203700  | 2.48817600  | 0.88696800  |
| O    | 1.97927700  | -2.11174700 | 0.32106600  |
| O    | -2.87468900 | -0.43465400 | 0.09928800  |
| P    | -0.61831500 | -1.79271800 | 0.10894000  |
| P    | 1.80717500  | 0.38135600  | -0.57783200 |
| P    | -1.15995600 | 1.39545600  | -0.41021400 |
| H    | -1.78074000 | 1.94985600  | 0.73812400  |
| H    | -3.13320600 | -1.34783000 | 0.28484400  |
| H    | 2.82073700  | 0.51026100  | 0.40305700  |
| 3_07 |             |             |             |
| 01   |             |             |             |
| C    | -1.73641600 | 0.12623100  | -0.01121800 |
| C    | 0.81284400  | -1.37721700 | 0.10858100  |
| C    | 0.75203800  | 1.60456500  | 0.05599800  |
| O    | 1.25549200  | -2.16382900 | 1.07532400  |
| O    | -2.91246100 | -0.08552200 | 0.10191400  |
| O    | 1.61087100  | 2.40462200  | 0.25155600  |
| P    | -1.00740200 | 1.76032900  | 0.21396500  |
| P    | -0.84919000 | -1.59020700 | -0.47959600 |
| P    | 1.70910500  | -0.10921200 | -0.70399000 |
| H    | 2.77179800  | -0.04424900 | 0.24426200  |
| H    | 2.17254700  | -1.94943600 | 1.29157300  |
| H    | -1.33405200 | -2.28360900 | 0.65795800  |
| 3_08 |             |             |             |
| 01   |             |             |             |
| C    | -1.13952600 | -0.07239300 | -0.02369000 |
| C    | 0.68174800  | 1.55682000  | -0.13962900 |
| C    | 1.39566000  | -1.18220300 | -0.10245400 |
| P    | -2.95855900 | 0.06234500  | 0.21658900  |
| H    | -3.24209800 | 0.60899400  | -1.06569600 |
| H    | -3.25890500 | -1.27853000 | -0.13766700 |
| P    | -0.41494200 | -1.61452800 | -0.07756900 |
| P    | 1.89635700  | 0.43813300  | 0.68633300  |
| O    | 2.21603900  | -1.96870300 | -0.49011400 |
| O    | 0.95271500  | 2.62653300  | -0.57503700 |
| O    | -0.66031600 | 1.19191900  | -0.10988500 |
| H    | 2.96336000  | 0.76896000  | -0.18200100 |
| 3_09 |             |             |             |
| 01   |             |             |             |
| C    | 1.15045600  | -0.12924300 | 0.01977900  |
| C    | -1.42115200 | -1.21925900 | -0.02142500 |
| C    | -0.65830000 | 1.44296000  | 0.00098900  |
| P    | -2.09565400 | 0.48937200  | 0.01665500  |
| P    | 0.38744600  | -1.64049200 | 0.07973400  |
| P    | 2.97848700  | 0.02666600  | -0.13358600 |
| H    | 3.20437400  | 0.53093500  | 1.17949900  |
| H    | 3.24712500  | -1.32394000 | 0.20903000  |
| O    | 0.63349000  | 1.12855600  | -0.02933600 |
| O    | -0.71857400 | 2.77165600  | 0.00772000  |
| H    | -1.64588600 | 3.03611600  | 0.01670200  |
| O    | -2.20064500 | -2.14309200 | -0.08380000 |
| 3_10 |             |             |             |
| 01   |             |             |             |
| C    | 1.14650700  | -0.16092600 | 0.01956800  |
| C    | -0.65490500 | 1.45023600  | 0.00302500  |
| C    | -1.45367900 | -1.17607200 | -0.01740100 |
| P    | 2.97671200  | -0.03076200 | -0.12721300 |
| H    | 3.22074700  | 0.37904000  | 1.21611400  |
| H    | 3.21944300  | -1.40525100 | 0.12562900  |
| P    | 0.34637100  | -1.64955200 | 0.06960400  |
| P    | -2.11524000 | 0.53687900  | 0.01229600  |



|      |             |             |             |
|------|-------------|-------------|-------------|
| O    | -2.24699800 | -2.09025900 | -0.07169000 |
| O    | -0.75823400 | 2.77441600  | 0.00994300  |
| O    | 0.64126800  | 1.10817100  | -0.02192300 |
| H    | 0.12634900  | 3.15969000  | -0.02382600 |
| 3_11 |             |             |             |
| O I  |             |             |             |
| C    | -1.16129800 | -0.10712100 | 0.01904000  |
| C    | 0.55940700  | 1.66360900  | 0.01812300  |
| C    | 1.39934400  | -0.97606100 | -0.00575200 |
| P    | -2.99419000 | -0.14487900 | -0.15029000 |
| H    | -3.14443300 | -1.48813000 | 0.28648000  |
| H    | -3.27005100 | 0.43299900  | 1.12065200  |
| P    | -0.29573700 | -1.57896400 | 0.08574000  |
| P    | 2.04810700  | 0.61623600  | -0.05374000 |
| O    | 2.24198800  | -2.02291400 | -0.02146400 |
| H    | 3.15731300  | -1.71561200 | -0.05898600 |
| O    | 0.65322400  | 2.85004800  | 0.07515800  |
| O    | -0.75774500 | 1.16065300  | -0.02397600 |
| 3_12 |             |             |             |
| O I  |             |             |             |
| C    | 1.17144100  | -0.09624400 | 0.01623100  |
| C    | -0.57322400 | 1.65701000  | 0.02491600  |
| C    | -1.41214200 | -0.96732400 | -0.00625700 |
| P    | 3.00259500  | -0.14603300 | -0.16044300 |
| H    | 3.28525400  | 0.44844000  | 1.10105600  |
| H    | 3.14743300  | -1.48403500 | 0.29493400  |
| P    | 0.28671600  | -1.55419300 | 0.11040900  |
| P    | -2.07052600 | 0.61972400  | -0.07550900 |
| O    | -2.34146300 | -1.94137400 | -0.03187600 |
| O    | -0.65804200 | 2.84147900  | 0.10879800  |
| O    | 0.76114700  | 1.16146500  | -0.04164400 |
| H    | -1.92405700 | -2.81008600 | -0.00441000 |
| 3_13 |             |             |             |
| O I  |             |             |             |
| C    | -1.36094500 | -1.10368300 | 0.01379200  |
| C    | -1.29543700 | 1.39223300  | -0.02256200 |
| C    | 1.08961100  | -0.01586000 | 0.01892900  |
| P    | 0.30803500  | -1.60484000 | -0.04881500 |
| P    | 0.51533500  | 1.59438200  | 0.07432200  |
| O    | -2.06786700 | 2.29080800  | -0.08700600 |
| O    | -1.91865200 | 0.08359000  | 0.02153300  |
| O    | -2.26917300 | -2.06474100 | 0.04700600  |
| H    | -3.14632700 | -1.65706600 | 0.04591300  |
| P    | 2.92282600  | -0.18115200 | -0.11839500 |
| H    | 3.24888000  | 1.15063500  | 0.26067500  |
| H    | 3.15066400  | -0.73282000 | 1.17351000  |
| 3_14 |             |             |             |
| O I  |             |             |             |
| C    | -0.62340300 | 1.56994400  | -0.26807800 |
| C    | 0.77564800  | -0.07369000 | -0.07693700 |
| C    | -1.50418900 | -0.94172200 | 0.21814100  |
| P    | -0.53541400 | 0.40017600  | 1.22045700  |
| P    | 0.00831800  | -1.70954000 | -0.60086400 |
| P    | 2.61971700  | -0.06413400 | 0.14583600  |
| H    | 2.67827200  | 1.06634700  | 1.00887700  |
| H    | 2.62421100  | -1.00922300 | 1.20861200  |
| O    | 0.41168400  | 1.02895200  | -0.96234200 |
| O    | -2.66053100 | -1.18935600 | 0.18372700  |
| O    | -1.28804300 | 2.48925200  | -0.59372600 |
| H    | -0.28501700 | -1.41262000 | -1.95894800 |
| 3_15 |             |             |             |
| O I  |             |             |             |
| C    | -0.57656900 | 1.61560000  | -0.25831900 |
| C    | 0.76799200  | -0.07974300 | -0.07068200 |
| C    | -1.52484800 | -0.92807900 | 0.20874700  |
| P    | -0.54690600 | 0.40248300  | 1.19834400  |
| P    | -0.07854800 | -1.57765400 | -0.85938400 |
| P    | 2.60392700  | -0.15584500 | 0.20036500  |

|      |             |             |             |
|------|-------------|-------------|-------------|
| H    | 2.67420000  | 0.94482900  | 1.10042700  |
| H    | 2.53499400  | -1.12614300 | 1.23938900  |
| O    | 0.47181700  | 1.06707400  | -0.93192600 |
| O    | -2.65944200 | -1.25293600 | 0.27734600  |
| O    | -1.20639600 | 2.55912900  | -0.58213500 |
| H    | 0.26642500  | -2.48625500 | 0.18554500  |
| 3_16 |             |             |             |
| O1   |             |             |             |
| C    | 1.05163700  | 1.43411900  | -0.23300100 |
| C    | 1.23805700  | -0.70200300 | 0.08664000  |
| C    | -1.12129900 | -0.30865500 | 0.08651000  |
| P    | 0.19362200  | 0.44155400  | 1.14794900  |
| P    | -0.27426300 | -1.50964000 | -0.75236800 |
| O    | 1.76733500  | 0.38711200  | -0.73156000 |
| O    | 1.06223200  | 2.54745300  | -0.63106200 |
| O    | 2.22382000  | -1.44784600 | 0.64636100  |
| H    | 2.65103600  | -1.97575000 | -0.03630500 |
| P    | -2.81809500 | 0.29015000  | -0.04218700 |
| H    | -3.42643800 | -0.91125500 | -0.49814200 |
| H    | -3.18104000 | 0.12152000  | 1.32273500  |
| 3_17 |             |             |             |
| O1   |             |             |             |
| C    | 0.68270300  | 1.52299400  | -0.00310000 |
| C    | -1.58756400 | -0.03178400 | -0.00603000 |
| C    | 0.58947200  | -0.96273400 | 0.19353300  |
| P    | 1.79398200  | 0.15996100  | -0.76732900 |
| P    | -0.29006600 | 0.39046100  | 1.20059900  |
| P    | -0.93691800 | -1.37716900 | -0.83317500 |
| O    | 1.12348700  | -2.08841200 | 0.80656000  |
| H    | 1.87936000  | -1.82910700 | 1.34103800  |
| O    | -2.74610100 | 0.58319300  | -0.22934900 |
| O    | 0.58856000  | 2.68224500  | -0.22950800 |
| H    | 2.67407400  | 0.36809100  | 0.34719300  |
| H    | -2.89362300 | 1.27515700  | 0.42229100  |
| 3_18 |             |             |             |
| O1   |             |             |             |
| C    | -1.59092400 | -0.01322400 | -0.00217700 |
| C    | 0.57734600  | -0.96678000 | 0.18969100  |
| P    | -0.96034700 | -1.36682000 | -0.84074900 |
| P    | -0.28334500 | 0.39622800  | 1.20019200  |
| O    | -2.73638400 | 0.62097100  | -0.22814300 |
| O    | 1.24701600  | -2.01171700 | 0.81606200  |
| C    | 0.70624500  | 1.51799400  | -0.00679600 |
| P    | 1.80219600  | 0.13609400  | -0.74440700 |
| H    | 2.66816900  | 0.32341100  | 0.37857200  |
| O    | 0.62168100  | 2.67662000  | -0.23921300 |
| H    | 0.59915600  | -2.65515200 | 1.11615900  |
| H    | -2.85937400 | 1.33428400  | 0.40577500  |
| 3_19 |             |             |             |
| O1   |             |             |             |
| C    | -1.58409900 | -0.07828400 | -0.00851600 |
| C    | 0.62649800  | -0.94736600 | 0.16677800  |
| P    | -0.88564700 | -1.36159600 | -0.89404800 |
| P    | -0.30489400 | 0.36549100  | 1.21380300  |
| O    | -2.76414500 | 0.50219200  | -0.20560500 |
| O    | 1.28351100  | -2.00879000 | 0.78469000  |
| C    | 0.64785800  | 1.53938400  | 0.01673400  |
| P    | 1.90493800  | 0.25077300  | -0.52248200 |
| O    | 0.45596400  | 2.67205400  | -0.28011000 |
| H    | 0.62430800  | -2.64747000 | 1.07024600  |
| H    | -2.91354000 | 1.19475800  | 0.44535700  |
| H    | 1.62909200  | 0.22663400  | -1.91646800 |
| 3_20 |             |             |             |
| O1   |             |             |             |
| C    | 1.34885000  | 1.00373900  | -0.00782600 |
| C    | -1.41563400 | 0.93550700  | 0.01996800  |
| C    | 0.02364100  | -1.08578600 | 0.20494900  |
| P    | 1.55168300  | -0.68865700 | -0.86086600 |

|   |             |             |             |
|---|-------------|-------------|-------------|
| P | -0.00456900 | 0.52777900  | 1.23918500  |
| P | -1.63674600 | -0.81069500 | -0.64370200 |
| O | 0.00613800  | -2.32822000 | 0.83581800  |
| H | 0.77955500  | -2.40306300 | 1.40161100  |
| O | -1.94290900 | 1.96535700  | -0.24073000 |
| O | 1.88105100  | 2.04376200  | -0.20698200 |
| H | 2.49090300  | -1.08429900 | 0.14234400  |
| H | -1.22135400 | -0.50699900 | -1.97059100 |

3\_21

0 1

|   |             |             |             |
|---|-------------|-------------|-------------|
| C | 1.24241700  | -0.04382000 | 0.28900000  |
| P | 1.67668500  | 1.42658600  | -0.79906300 |
| H | 0.39102700  | 1.57887700  | -1.38573500 |
| H | 1.45269600  | 2.42723500  | 0.19091500  |
| O | 2.27612800  | -0.16568700 | 1.19487700  |
| H | 2.28932200  | -1.06167300 | 1.54400000  |
| P | -0.56487100 | 0.02307100  | 1.19601000  |
| C | -0.79291500 | -1.09506200 | -0.13823900 |
| C | -2.11659200 | 0.46125000  | 0.07796800  |
| O | -2.94086900 | 1.27303600  | -0.11387500 |
| P | 0.73494100  | -1.53170400 | -0.78581100 |
| O | -2.06423900 | -0.81334300 | -0.56707700 |

3\_22

0 1

|   |             |             |             |
|---|-------------|-------------|-------------|
| C | 1.01464500  | -0.13283900 | 0.30832000  |
| P | -0.43737100 | -0.72250800 | -0.84004300 |
| C | -0.87692200 | 0.95905600  | -0.47054500 |
| C | -2.18412400 | -0.53077300 | 0.01699800  |
| O | -3.05191600 | -1.13918600 | 0.51617800  |
| P | 0.47851800  | 1.74579000  | 0.19327500  |
| O | -2.23011200 | 0.86981900  | -0.27498400 |
| O | 0.79103800  | -0.61189000 | 1.60073300  |
| H | 1.39207100  | -0.15959600 | 2.20051400  |
| P | 2.66249000  | -0.54971300 | -0.46872900 |
| H | 3.43344600  | 0.15070500  | 0.50588500  |
| H | 2.82625600  | -1.81724200 | 0.16200300  |

3\_23

0 1

|   |             |             |             |
|---|-------------|-------------|-------------|
| C | -0.33158000 | 1.71885800  | -0.22169500 |
| C | 0.79010900  | -0.13537400 | -0.10044500 |
| C | -1.45143500 | -0.82277300 | 0.13702600  |
| P | -0.51803700 | 0.39746900  | 1.14186600  |
| P | -0.26295400 | -1.50894700 | -0.88030000 |
| P | 2.57330100  | -0.51116600 | 0.22035500  |
| H | 2.77091200  | 0.44426800  | 1.25851200  |
| H | 2.31597500  | -1.58731800 | 1.11413200  |
| O | 0.70516000  | 1.11945700  | -0.85884100 |
| O | -2.74427600 | -1.04210100 | 0.32813900  |
| O | -0.83050600 | 2.75494000  | -0.49811600 |
| H | -3.05712100 | -1.73992900 | -0.26023100 |

3\_24

0 1

|   |             |             |             |
|---|-------------|-------------|-------------|
| C | 1.36563800  | 1.03141500  | -0.01187700 |
| C | -1.45791600 | 0.91404600  | -0.00674500 |
| C | 0.04451800  | -1.06352300 | 0.21348100  |
| P | 1.62303000  | -0.69101900 | -0.79754200 |
| P | -0.02318600 | 0.56208600  | 1.19512400  |
| P | -1.52508400 | -0.80274900 | -0.82211500 |
| O | -0.01674000 | -2.29418000 | 0.85982800  |
| H | 0.76734500  | -2.40391900 | 1.40517500  |
| O | -2.08192800 | 1.90173200  | -0.20585600 |
| O | 1.88448400  | 2.07329800  | -0.23762000 |
| H | 2.50204200  | -1.06329400 | 0.26645800  |
| H | -2.39073800 | -1.29600100 | 0.19641000  |

3\_25

0 1

|   |             |            |            |
|---|-------------|------------|------------|
| C | 1.16206800  | 1.19390300 | 0.01377100 |
| C | -1.51610900 | 0.71340600 | 0.02540500 |

|      |             |             |             |
|------|-------------|-------------|-------------|
| C    | 0.19251100  | -1.08783100 | 0.17287700  |
| P    | 1.76680800  | -0.45030600 | -0.65130900 |
| P    | -0.08452600 | 0.48682300  | 1.26985800  |
| P    | -1.48281800 | -1.02040700 | -0.68458700 |
| O    | 0.31315400  | -2.33986000 | 0.77749600  |
| H    | 1.14193600  | -2.37681200 | 1.26328500  |
| O    | -2.18003700 | 1.66696100  | -0.21256300 |
| O    | 1.43521300  | 2.31720600  | -0.25470800 |
| H    | 1.41090200  | -0.28851700 | -2.01822500 |
| H    | -1.12225900 | -0.64764900 | -2.00861500 |
| 3_26 |             |             |             |
| O1   |             |             |             |
| C    | -0.08809400 | 0.49041700  | 0.22276600  |
| P    | -0.87402100 | 2.12624500  | -0.32259100 |
| H    | -2.21645600 | 1.66953700  | -0.20542200 |
| H    | -0.80574000 | 1.87573900  | -1.71929500 |
| O    | -0.48388200 | 0.38155600  | 1.56070300  |
| H    | 0.00996500  | -0.33343800 | 1.97462900  |
| P    | 1.78638500  | 0.88188500  | 0.04715300  |
| P    | -0.50109100 | -1.04151300 | -0.86030400 |
| C    | 2.34145500  | -0.71128200 | 0.03254200  |
| C    | -1.97155300 | -1.32467300 | -0.08646900 |
| O    | 2.85698000  | -1.73974300 | 0.02676400  |
| O    | -2.97906300 | -1.57154500 | 0.40918200  |
| 3_27 |             |             |             |
| O1   |             |             |             |
| C    | -1.53753700 | -0.81237100 | 0.04778600  |
| C    | 1.35278500  | -0.42098200 | 0.31062900  |
| C    | -0.72768700 | 1.80101400  | 0.04500700  |
| O    | 1.16950000  | 0.01667100  | 1.57157700  |
| O    | -2.46693800 | -1.47623600 | 0.39783800  |
| O    | 0.02078500  | 2.54226000  | 0.51086000  |
| P    | -1.96288200 | 0.91679500  | -0.66264100 |
| P    | 0.12153200  | -1.67993300 | -0.19616200 |
| P    | 2.61307000  | 0.11628900  | -0.69640100 |
| H    | 1.83424200  | 0.68141800  | 1.79396900  |
| H    | 0.03795700  | -2.33625300 | 1.06092500  |
| H    | 2.23987000  | -0.70994700 | -1.78957300 |
| 3_28 |             |             |             |
| O1   |             |             |             |
| C    | 0.74749700  | 1.31030400  | 0.04384600  |
| C    | -1.43150000 | -0.52036900 | 0.01674200  |
| C    | 2.10130800  | -1.01277300 | 0.05205200  |
| O    | -0.79433300 | -1.64151500 | -0.36051300 |
| O    | 0.65360400  | 2.48849000  | -0.13951700 |
| O    | 2.21133300  | -2.01039200 | 0.60870200  |
| P    | 2.13243700  | 0.40526800  | -0.86137300 |
| P    | -0.42218400 | 0.41114900  | 1.23500300  |
| P    | -2.98594000 | 0.01114800  | -0.42091400 |
| H    | -3.28676300 | -1.16408200 | -1.19088600 |
| H    | -1.33927400 | -2.11509600 | -0.99988800 |
| H    | -1.30731700 | 1.51006800  | 1.35482300  |
| 3_29 |             |             |             |
| O1   |             |             |             |
| C    | -1.55514700 | -0.00006800 | -0.34990100 |
| P    | -2.61511900 | 0.02379000  | 1.19784400  |
| H    | -1.55341500 | 0.38125100  | 2.07231000  |
| H    | -3.04669600 | 1.36980900  | 1.03517300  |
| O    | -2.39120100 | -0.23846600 | -1.39965300 |
| H    | -1.89779900 | -0.11901500 | -2.21789900 |
| P    | -0.11634400 | 1.24660200  | -0.56221000 |
| O    | -0.58476300 | -1.11426700 | -0.16409100 |
| C    | 0.50446500  | -0.32403500 | -0.24211000 |
| P    | 2.06200100  | -1.21400400 | 0.05554800  |
| C    | 2.94342600  | 0.21587700  | 0.25326100  |
| O    | 3.62388600  | 1.12416900  | 0.41064200  |
| 3_30 |             |             |             |
| O1   |             |             |             |

|      |             |             |             |
|------|-------------|-------------|-------------|
| C    | -1.28753200 | -1.19699300 | -0.18357000 |
| C    | -0.19391700 | 0.55026900  | -0.01663800 |
| C    | 2.26307900  | -0.47549400 | -0.05151500 |
| P    | -0.41400500 | -0.85043900 | 1.25951000  |
| P    | 1.48871600  | 0.84214700  | -0.78724700 |
| P    | -0.98422500 | 2.22941000  | 0.24038000  |
| H    | -2.13235800 | 1.74431600  | 0.92870300  |
| H    | -0.26971800 | 2.52448100  | 1.43322200  |
| O    | -1.07920800 | -0.15615200 | -0.98659800 |
| O    | 2.97164700  | -1.28502900 | 0.35128500  |
| O    | -2.05524200 | -2.16968200 | -0.61771800 |
| H    | -2.34256800 | -1.96535500 | -1.51697900 |
| 3_31 |             |             |             |
| O 1  |             |             |             |
| C    | 0.86188100  | 0.15291300  | 0.00492600  |
| C    | -0.79373800 | 1.11048100  | -0.01181100 |
| C    | -1.12698900 | -1.35258200 | 0.00361600  |
| P    | -0.43860700 | -0.22114600 | 1.35981200  |
| P    | -0.46018300 | -0.20016200 | -1.35234800 |
| O    | -1.72039300 | -2.37871100 | 0.00010400  |
| O    | 0.56634900  | 1.58826600  | 0.00154800  |
| O    | -1.77327200 | 2.02618800  | -0.08108400 |
| H    | -1.72539200 | 2.59068800  | 0.69869500  |
| P    | 2.59389300  | -0.43174000 | -0.00981800 |
| H    | 3.02995200  | 0.43647000  | -1.04829800 |
| H    | 3.04050500  | 0.41773700  | 1.04000400  |
| 3_32 |             |             |             |
| O 1  |             |             |             |
| 3_33 |             |             |             |
| O 1  |             |             |             |
| C    | -1.48427900 | -0.85944100 | -0.11293000 |
| C    | 1.48394300  | -0.85990300 | -0.11324500 |
| C    | 0.00013100  | 1.61653100  | 0.25776300  |
| P    | -0.00018600 | -1.60243400 | 0.74331200  |
| H    | -0.00047100 | -2.84183300 | 0.05921800  |
| P    | -1.57895500 | 0.97664600  | -0.53443800 |
| H    | -2.42977800 | 1.29300800  | 0.55461300  |
| P    | 1.57979300  | 0.97655900  | -0.53319500 |
| H    | 2.42945600  | 1.29160400  | 0.55715400  |
| O    | 2.45701700  | -1.53509700 | -0.30481700 |
| O    | -0.00014500 | 2.52083300  | 1.04640000  |
| O    | -2.45784200 | -1.53416800 | -0.30354400 |
| 3_34 |             |             |             |
| O 1  |             |             |             |
| C    | 0.86808600  | -1.36590200 | 0.18863800  |
| C    | 0.86735600  | 1.36632800  | 0.18876500  |
| C    | -1.66461300 | -0.00044100 | 0.05466800  |
| O    | 1.36982300  | 2.03384800  | 1.04246500  |
| O    | 1.37089500  | -2.03329100 | 1.04227700  |
| O    | -2.75579900 | -0.00074800 | 0.55210200  |
| P    | -0.88048200 | -1.64539900 | -0.42516600 |
| H    | -1.36166500 | -2.32871200 | 0.71836200  |
| P    | 1.85695900  | 0.00048000  | -0.70207800 |
| H    | 0.99390100  | 0.00043900  | -1.83679400 |
| P    | -0.88137900 | 1.64505200  | -0.42523200 |
| H    | -1.36301700 | 2.32790400  | 0.71839400  |

### 3.5 Isomers of (HPCO)<sub>4</sub>

**Table S4.** Computed isomers of (HPCO)<sub>4</sub>. Isomers with a suitable coupling pattern (number of multiplets due to <sup>1</sup>J<sub>P-H</sub> coupling) are shown in bold.

| tetramers | energy [a.u.]         | rel. E<br>[kJ mol <sup>-1</sup> ] | δ( <sup>31</sup> P)<br>ppm | δ( <sup>31</sup> P)<br>ppm | δ( <sup>31</sup> P)<br>ppm | δ( <sup>31</sup> P)<br>ppm |
|-----------|-----------------------|-----------------------------------|----------------------------|----------------------------|----------------------------|----------------------------|
| 1         | -1820.17906551        | 70.2                              | 22                         | 76                         | 113                        | 117                        |
| 2         | -1820.17429888        | 82.7                              | 40                         | 42                         | 82                         | 119                        |
| 3         | -1820.17464044        | 81.8                              | 63                         | 70                         | 70                         | 105                        |
| 4         | -1820.18160701        | 63.5                              | 88                         | 88                         | 88                         | 88                         |
| 5         | -1820.16377872        | 110.3                             | 5                          | 5                          | 39                         | 285                        |
| 6         | -1820.16266262        | 113.3                             | 11                         | 48                         | 65                         | 262                        |
| 7         | -1820.16917752        | 96.2                              | 22                         | 76                         | 135                        | 186                        |
| 8         | -1820.16376120        | 110.4                             | 9                          | 72                         | 144                        | 190                        |
| 9         | -1820.14093438        | 170.3                             | -11                        | 67                         | 294                        | 355                        |
| 10        | -1820.15130850        | 143.1                             | -18                        | -2                         | 191                        | 259                        |
| 11        | -1820.14861646        | 150.1                             | -83                        | 18                         | 176                        | 236                        |
| 12        | -1820.14637624        | 156.0                             | -11                        | 59                         | 267                        | 353                        |
| 13        | -1820.14405695        | 162.1                             | -12                        | 104                        | 282                        | 325                        |
| 14        | -1820.14873532        | 149.8                             | -15                        | 101                        | 263                        | 328                        |
| 15        | -1820.13623534        | 182.6                             | -64                        | 37                         | 217                        | 644                        |
| 16        | -1820.16399405        | 109.8                             | -67                        | 6                          | 55                         | 300                        |
| 17        | -1820.17098224        | 91.4                              | -2                         | 30                         | 114                        | 245                        |
| 18        | -1820.17803152        | 72.9                              | 8                          | 69                         | 138                        | 206                        |
| 19        | -1820.16669557        | 102.7                             | -53                        | 19                         | 45                         | 276                        |
| 20        | -1820.18096250        | 65.2                              | 80                         | 80                         | 97                         | 104                        |
| 21        | -1820.14772235        | 152.5                             | 9                          | 233                        | 248                        | 302                        |
| 22        | -1820.13152793        | 195.0                             | 11                         | 198                        | 213                        | 275                        |
| 23        | -1820.14494191        | 159.8                             | 210                        | 212                        | 234                        | 237                        |
| <b>24</b> | <b>-1820.12822279</b> | <b>203.7</b>                      | <b>-113</b>                | <b>64</b>                  | <b>223</b>                 | <b>273</b>                 |
| <b>25</b> | <b>-1820.13409357</b> | <b>188.3</b>                      | <b>-114</b>                | <b>117</b>                 | <b>198</b>                 | <b>265</b>                 |
| <b>26</b> | <b>-1820.16268099</b> | <b>113.2</b>                      | <b>-112</b>                | <b>77</b>                  | <b>184</b>                 | <b>276</b>                 |
| <b>27</b> | <b>-1820.14807239</b> | <b>151.6</b>                      | <b>-97</b>                 | <b>98</b>                  | <b>103</b>                 | <b>284</b>                 |
| <b>28</b> | <b>-1820.12822276</b> | <b>203.7</b>                      | <b>-113</b>                | <b>64</b>                  | <b>223</b>                 | <b>273</b>                 |
| <b>29</b> | <b>-1820.14650155</b> | <b>155.7</b>                      | <b>-98</b>                 | <b>95</b>                  | <b>148</b>                 | <b>266</b>                 |
| <b>30</b> | <b>-1820.15134643</b> | <b>143.0</b>                      | <b>-115</b>                | <b>-40</b>                 | <b>279</b>                 | <b>345</b>                 |
| <b>31</b> | <b>-1820.16456257</b> | <b>108.3</b>                      | <b>-114</b>                | <b>18</b>                  | <b>206</b>                 | <b>302</b>                 |
| <b>32</b> | <b>-1820.13409381</b> | <b>188.3</b>                      | <b>-114</b>                | <b>117</b>                 | <b>198</b>                 | <b>266</b>                 |
| <b>33</b> | <b>-1820.14952168</b> | <b>147.8</b>                      | <b>-95</b>                 | <b>-2</b>                  | <b>250</b>                 | <b>271</b>                 |
| 34        | -1820.13458024        | 187.0                             | -27                        | 222                        | 265                        | 300                        |
| <b>35</b> | <b>-1820.18169166</b> | <b>63.3</b>                       | <b>-82</b>                 | <b>54</b>                  | <b>127</b>                 | <b>142</b>                 |
| <b>36</b> | <b>-1820.18149224</b> | <b>63.8</b>                       | <b>-64</b>                 | <b>29</b>                  | <b>180</b>                 | <b>211</b>                 |
| <b>37</b> | <b>-1820.18820477</b> | <b>46.2</b>                       | <b>-92</b>                 | <b>85</b>                  | <b>95</b>                  | <b>122</b>                 |
| <b>38</b> | <b>-1820.18982340</b> | <b>42.0</b>                       | <b>-42</b>                 | <b>130</b>                 | <b>163</b>                 | <b>200</b>                 |
| <b>39</b> | <b>-1820.18751515</b> | <b>48.0</b>                       | <b>-96</b>                 | <b>86</b>                  | <b>116</b>                 | <b>123</b>                 |
| <b>40</b> | <b>-1820.18807958</b> | <b>46.5</b>                       | <b>-62</b>                 | <b>153</b>                 | <b>161</b>                 | <b>187</b>                 |
| <b>41</b> | <b>-1820.18353979</b> | <b>58.4</b>                       | <b>-46</b>                 | <b>49</b>                  | <b>174</b>                 | <b>191</b>                 |
| 42        | -1820.17663948        | 76.6                              | -53                        | 15                         | 76                         | 333                        |
| 43        | -1820.19293975        | 33.8                              | 13                         | 64                         | 93                         | 173                        |

|           |                       |              |             |             |            |            |
|-----------|-----------------------|--------------|-------------|-------------|------------|------------|
| 44        | -1820.18856145        | 45.3         | -34         | 72          | 130        | 249        |
| 45        | -1820.18882024        | 44.6         | -8          | 53          | 139        | 229        |
| 46        | -1820.18413378        | 56.9         | 7           | 43          | 173        | 238        |
| 47        | -1820.18936566        | 43.2         | -2          | 43          | 178        | 275        |
| 48        | -1820.16119065        | 117.1        | -22         | 16          | 174        | 223        |
| 49        | -1820.17430162        | 82.7         | 35          | 54          | 198        | 261        |
| 50        | -1820.17498132        | 80.9         | 161         | 162         | 180        | 183        |
| 51        | -1820.17908494        | 70.1         | -8          | 161         | 203        | 216        |
| 52        | -1820.17180368        | 89.3         | 39          | 54          | 250        | 306        |
| 53        | -1820.17312581        | 85.8         | 161         | 161         | 167        | 220        |
| <b>54</b> | <b>-1820.17324232</b> | <b>85.5</b>  | <b>-87</b>  | <b>128</b>  | <b>145</b> | <b>189</b> |
| <b>55</b> | <b>-1820.17394115</b> | <b>83.6</b>  | <b>-86</b>  | <b>111</b>  | <b>142</b> | <b>219</b> |
| <b>56</b> | <b>-1820.17488443</b> | <b>81.2</b>  | <b>-83</b>  | <b>130</b>  | <b>142</b> | <b>175</b> |
| 57        | -1820.17775374        | 73.6         | -15         | 181         | 196        | 214        |
| <b>58</b> | <b>-1820.17237357</b> | <b>87.8</b>  | <b>-75</b>  | <b>137</b>  | <b>161</b> | <b>195</b> |
| 59        | -1820.18208705        | 62.3         | 39          | 137         | 171        | 230        |
| 60        | -1820.18003696        | 67.6         | -47         | 149         | 188        | 206        |
| 61        | -1820.16130150        | 116.8        | 35          | 157         | 168        | 294        |
| 62        | -1820.18756699        | 47.9         | 8           | 67          | 78         | 250        |
| 63        | -1820.18702493        | 49.3         | -25         | 58          | 88         | 236        |
| 64        | -1820.18600843        | 52.0         | 19          | 52          | 140        | 192        |
| 65        | -1820.17873855        | 71.1         | 15          | 78          | 107        | 218        |
| 66        | -1820.16632567        | 103.6        | -82         | 91          | 111        | 305        |
| <b>67</b> | <b>-1820.18281240</b> | <b>60.4</b>  | <b>-80</b>  | <b>65</b>   | <b>131</b> | <b>158</b> |
| <b>68</b> | <b>-1820.17313341</b> | <b>85.8</b>  | <b>-86</b>  | <b>121</b>  | <b>153</b> | <b>170</b> |
| <b>69</b> | <b>-1820.18984181</b> | <b>41.9</b>  | <b>-91</b>  | <b>67</b>   | <b>122</b> | <b>123</b> |
| <b>70</b> | <b>-1820.17197831</b> | <b>88.8</b>  | <b>-100</b> | <b>8</b>    | <b>205</b> | <b>297</b> |
| <b>71</b> | <b>-1820.17411616</b> | <b>83.2</b>  | <b>-99</b>  | <b>-43</b>  | <b>242</b> | <b>284</b> |
| <b>72</b> | <b>-1820.20361628</b> | <b>5.7</b>   | <b>-96</b>  | <b>74</b>   | <b>272</b> | <b>278</b> |
| <b>73</b> | <b>-1820.18900967</b> | <b>44.1</b>  | <b>-75</b>  | <b>53</b>   | <b>242</b> | <b>288</b> |
| <b>74</b> | <b>-1820.19053325</b> | <b>40.1</b>  | <b>-78</b>  | <b>45</b>   | <b>254</b> | <b>268</b> |
| <b>75</b> | <b>-1820.20580174</b> | <b>0.0</b>   | <b>-101</b> | <b>92</b>   | <b>238</b> | <b>297</b> |
| <b>76</b> | <b>-1820.18736209</b> | <b>48.4</b>  | <b>-119</b> | <b>119</b>  | <b>211</b> | <b>246</b> |
| <b>77</b> | <b>-1820.16396082</b> | <b>109.9</b> | <b>-125</b> | <b>99</b>   | <b>172</b> | <b>209</b> |
| <b>78</b> | <b>-1820.16317727</b> | <b>111.9</b> | <b>-114</b> | <b>102</b>  | <b>169</b> | <b>176</b> |
| <b>79</b> | <b>-1820.18326768</b> | <b>59.2</b>  | <b>-121</b> | <b>142</b>  | <b>204</b> | <b>266</b> |
| <b>80</b> | <b>-1820.18303612</b> | <b>59.8</b>  | <b>-101</b> | <b>188</b>  | <b>224</b> | <b>255</b> |
| <b>81</b> | <b>-1820.15384000</b> | <b>136.4</b> | <b>-102</b> | <b>112</b>  | <b>153</b> | <b>236</b> |
| <b>82</b> | <b>-1820.18731354</b> | <b>48.5</b>  | <b>-166</b> | <b>-64</b>  | <b>37</b>  | <b>297</b> |
| 83        | -1820.15943315        | 121.7        | -122        | -83         | 12         | 178        |
| <b>84</b> | <b>-1820.14904278</b> | <b>149.0</b> | <b>-110</b> | <b>-108</b> | <b>52</b>  | <b>272</b> |
| <b>85</b> | <b>-1820.16673709</b> | <b>102.6</b> | <b>-74</b>  | <b>113</b>  | <b>142</b> | <b>197</b> |
| <b>86</b> | <b>-1820.17420455</b> | <b>83.0</b>  | <b>-113</b> | <b>135</b>  | <b>176</b> | <b>263</b> |
| 87        | -1820.17314002        | 85.8         | 124         | 136         | 288        | 289        |
| 88        | -1820.16478638        | 107.7        | -88         | 311         | 313        | 349        |
| <b>89</b> | <b>-1820.18470047</b> | <b>55.4</b>  | <b>-115</b> | <b>135</b>  | <b>187</b> | <b>267</b> |
| <b>90</b> | <b>-1820.16704565</b> | <b>101.8</b> | <b>-47</b>  | <b>123</b>  | <b>137</b> | <b>195</b> |
| <b>91</b> | <b>-1820.18064786</b> | <b>66.0</b>  | <b>-90</b>  | <b>54</b>   | <b>126</b> | <b>133</b> |
| <b>92</b> | <b>-1820.13688261</b> | <b>180.9</b> | <b>-92</b>  | <b>-64</b>  | <b>123</b> | <b>235</b> |

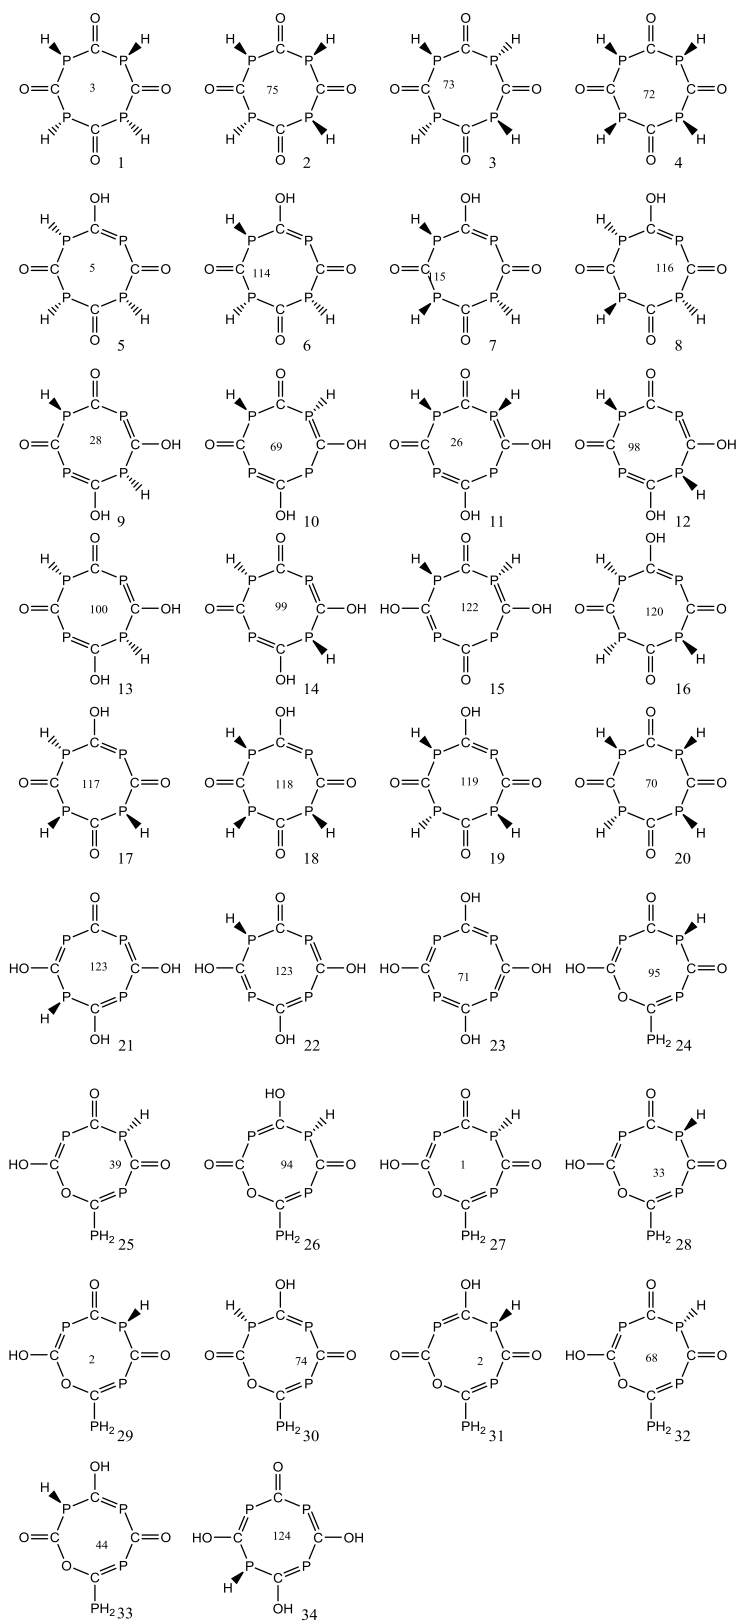



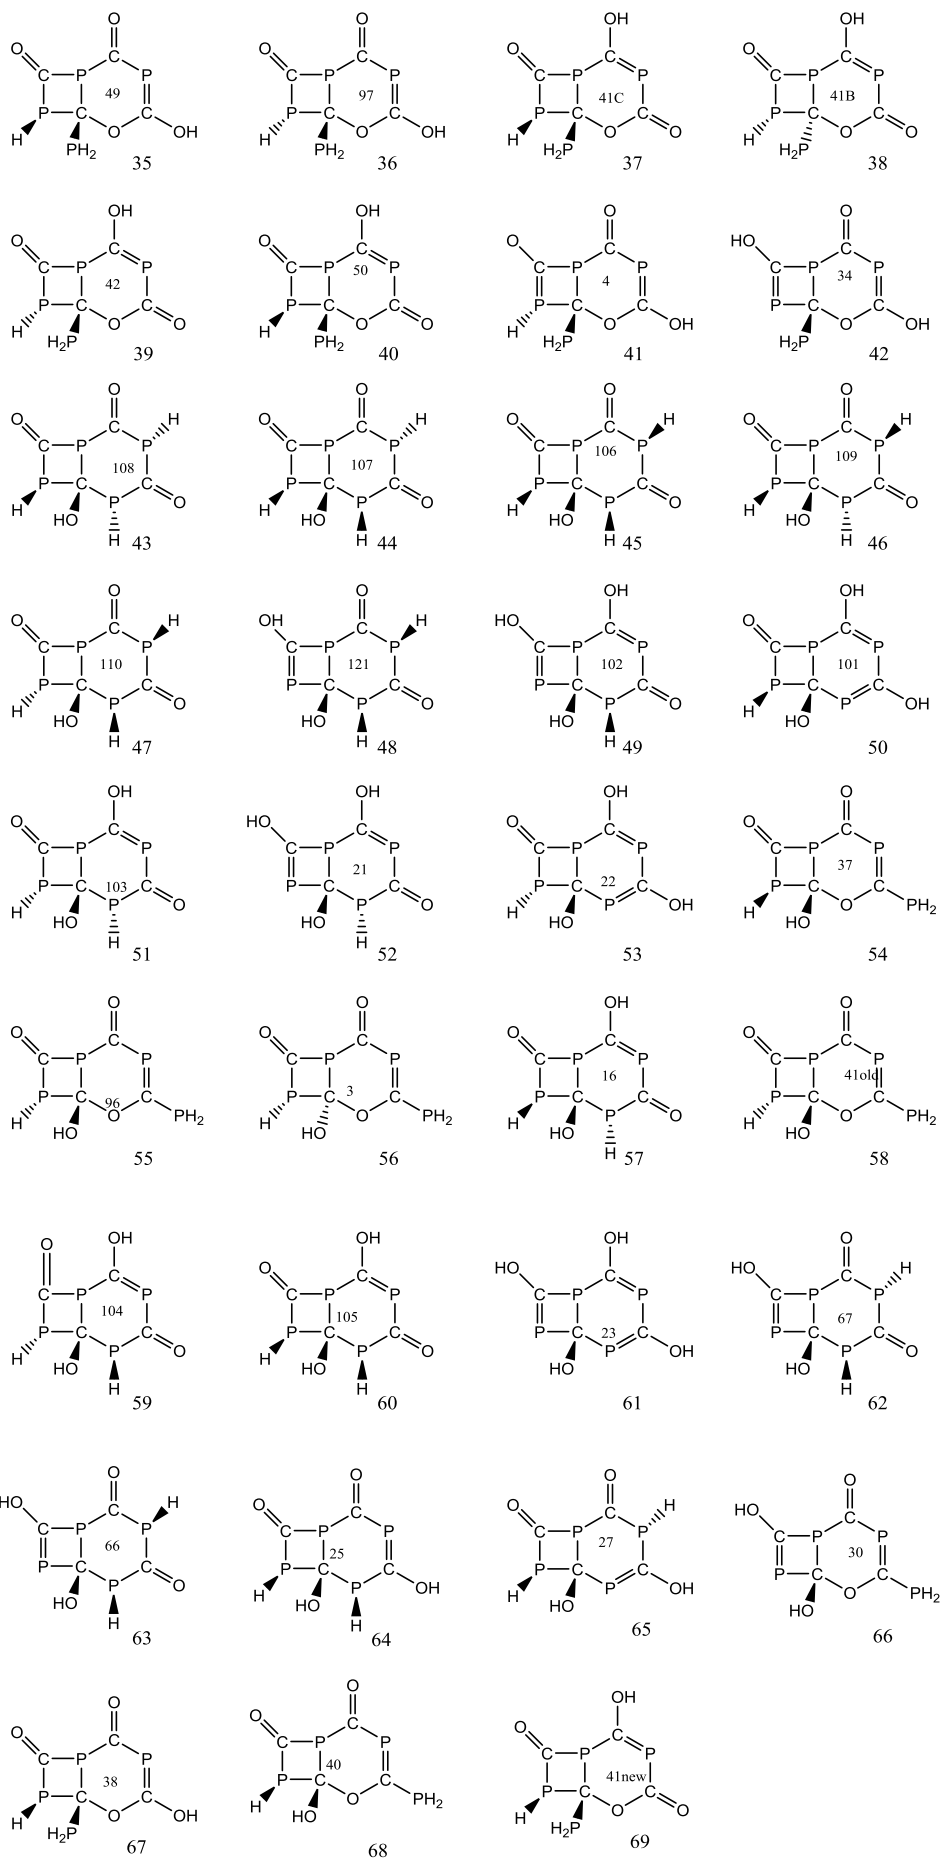

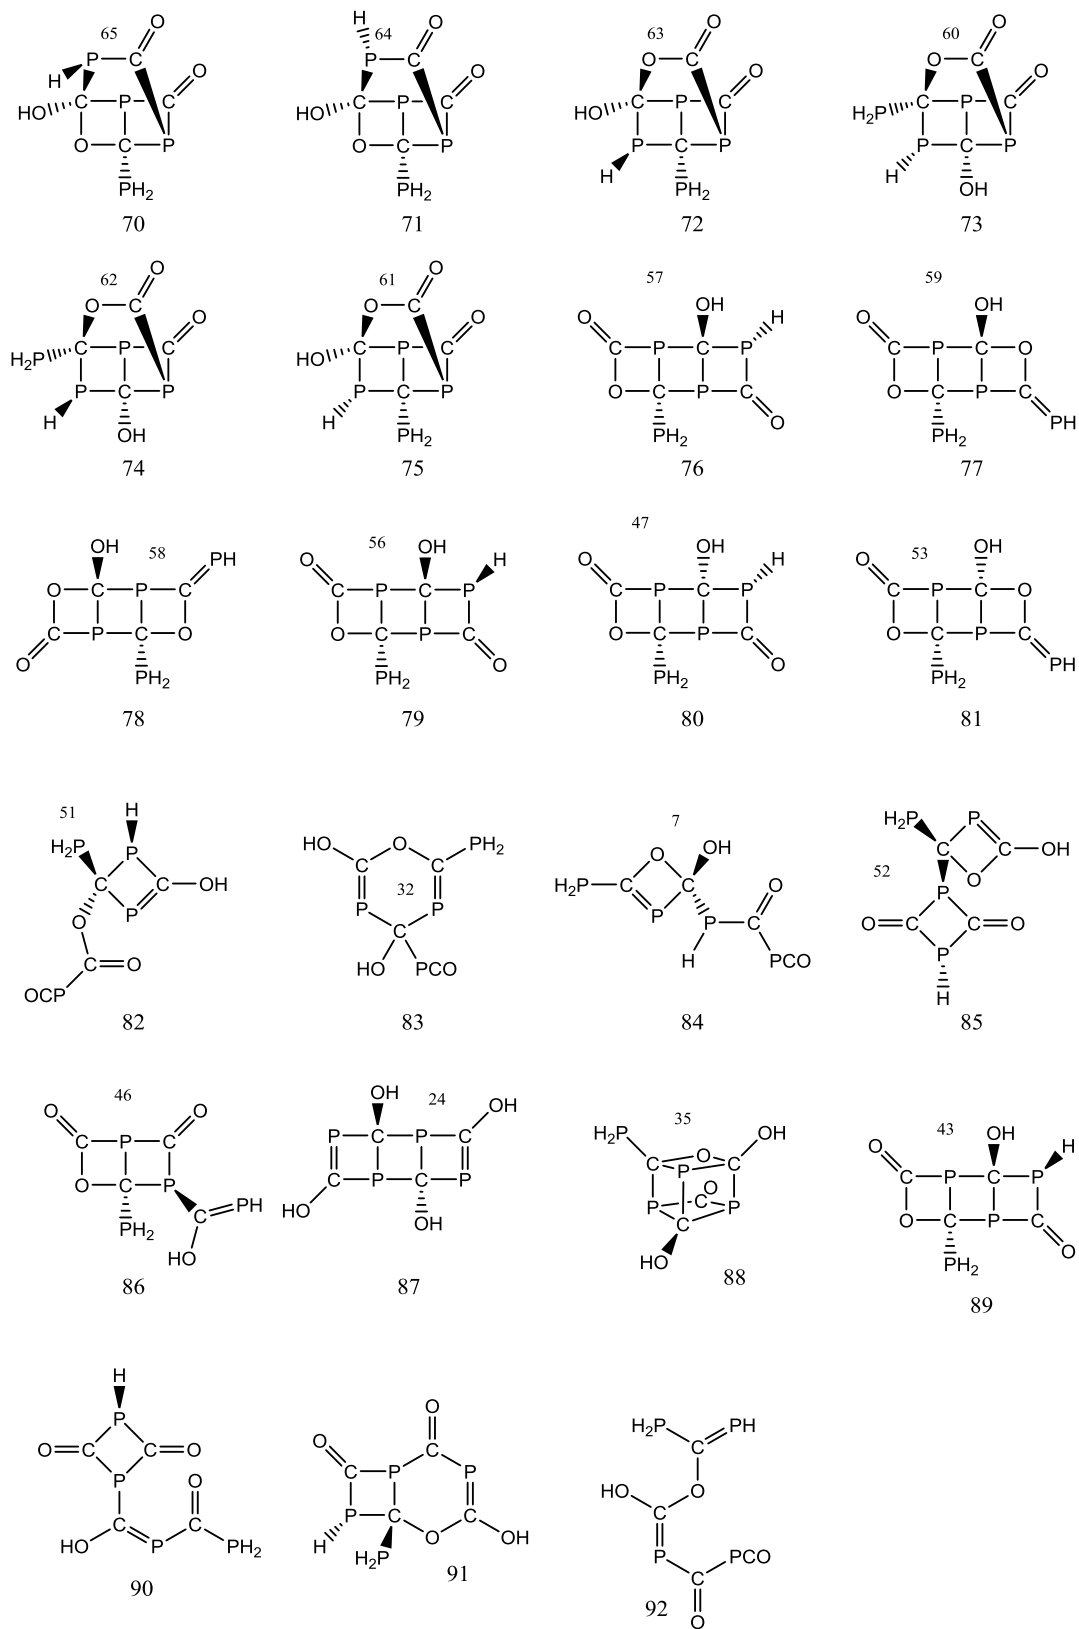

**Figure S37.** Computed isomers of  $(\text{HPCO})_4$ .

## 4\_01

0 1

|   |             |             |             |
|---|-------------|-------------|-------------|
| C | -0.08256500 | -1.94015200 | -0.18836200 |
| O | -0.48770900 | -2.57873400 | -1.12015000 |
| P | -1.29399300 | -1.38015500 | 1.14039300  |
| P | 1.76130600  | -1.73270300 | 0.09786800  |
| C | 2.09343600  | 0.10474400  | -0.12207900 |
| C | -2.16125400 | -0.04808200 | 0.07996800  |
| O | 2.99475500  | 0.43953500  | -0.83735100 |
| O | -3.34719700 | 0.07395800  | 0.13508000  |
| P | 1.27635300  | 1.36298500  | 1.04296000  |
| H | 2.16012200  | 2.40748400  | 0.67822400  |
| P | -1.14943900 | 0.94417000  | -1.16597600 |
| C | -0.11700900 | 2.04693900  | -0.03969200 |
| O | -0.29432600 | 3.23157400  | -0.04611200 |
| H | 2.15920400  | -2.10730800 | -1.20727100 |
| H | -0.40999400 | -0.45298600 | 1.76642200  |
| H | -2.14256500 | 1.92699100  | -1.39679700 |

## 4\_02

0 1

|   |             |             |             |
|---|-------------|-------------|-------------|
| C | -1.93939700 | -0.61812100 | 0.32426900  |
| O | -2.42249000 | -0.95213100 | 1.37306000  |
| P | -1.16013300 | -1.93163900 | -0.76543300 |
| P | -2.15021900 | 1.14737600  | -0.29669600 |
| C | -0.46022700 | 1.95943500  | -0.08645500 |
| C | 0.66122700  | -1.83169900 | -0.21736900 |
| O | -0.40603100 | 3.01221900  | 0.48120800  |
| O | 1.45918400  | -2.38939200 | -0.91383400 |
| P | 1.03351600  | 1.31536900  | -1.07492700 |
| H | 1.73762100  | 2.54070900  | -0.98108300 |
| P | 1.28774200  | -0.93393100 | 1.32617300  |
| C | 2.05136600  | 0.47159100  | 0.28017000  |
| O | 3.20732800  | 0.74036300  | 0.39951400  |
| H | -2.68486000 | 1.65397700  | 0.91200400  |
| H | 0.09628900  | -0.21484200 | 1.60455400  |
| H | -0.89436600 | -1.11317000 | -1.89549500 |

## 4\_03

0 1

|   |             |             |             |
|---|-------------|-------------|-------------|
| C | -1.39215800 | -1.54724100 | 0.08475800  |
| O | -1.83031400 | -2.41489900 | 0.78767900  |
| P | 0.09734400  | -1.84599100 | -1.04297100 |
| H | 0.19613500  | -3.22516300 | -0.73121500 |
| P | -2.43067600 | 0.00246700  | -0.17071100 |
| C | -1.38896700 | 1.55009600  | 0.08425600  |
| C | 1.55652700  | -1.36605800 | 0.06250000  |
| O | -1.82544200 | 2.41901500  | 0.78666300  |
| O | 2.61036800  | -1.89091400 | -0.14169800 |
| P | 0.10149800  | 1.84516800  | -1.04319500 |
| H | 0.20283000  | 3.22437000  | -0.73241000 |
| P | 1.43541800  | -0.00164300 | 1.37802900  |
| C | 1.55934500  | 1.36309400  | 0.06306100  |
| O | 2.61403200  | 1.88658500  | -0.14024000 |
| H | -3.02669200 | 0.00329200  | 1.11181200  |
| H | 0.01632000  | -0.00016100 | 1.42784600  |

## 4\_04

0 1

|   |             |             |             |
|---|-------------|-------------|-------------|
| C | -1.54188100 | -1.43904400 | 0.00042800  |
| O | -2.41919100 | -2.25826200 | 0.00104400  |
| P | -0.05932000 | -1.70806300 | -1.12549700 |
| H | -0.10788300 | -3.11974800 | -1.05061800 |
| P | -1.70828300 | 0.05931900  | 1.12539400  |
| C | -1.43904600 | 1.54187900  | -0.00048800 |
| C | 1.43903600  | -1.54187600 | -0.00048500 |
| O | -2.25823300 | 2.41922500  | -0.00115300 |
| O | 2.25820600  | -2.41921800 | -0.00116300 |
| P | 0.05939300  | 1.70832200  | -1.12531700 |
| H | 0.10803100  | 3.11997900  | -1.04998300 |
| P | 1.70804100  | -0.05938600 | 1.12557200  |

|   |             |             |            |
|---|-------------|-------------|------------|
| H | 3.11973100  | -0.10802800 | 1.05077800 |
| C | 1.54199200  | 1.43893000  | 0.00049500 |
| O | 2.41946700  | 2.25796400  | 0.00097500 |
| H | -3.11994400 | 0.10789600  | 1.05020800 |

4\_05

0 1

|   |             |             |             |
|---|-------------|-------------|-------------|
| C | -0.75799700 | -1.32804100 | 0.80050000  |
| O | -0.91888200 | -0.84876500 | 1.88252000  |
| P | 0.93087500  | -2.05837300 | 0.35895600  |
| P | -2.28095900 | -1.23258700 | -0.42946400 |
| C | -1.76086700 | 0.53530800  | -0.56149400 |
| C | 2.00788900  | -0.58521200 | -0.23118000 |
| O | -2.34480700 | 1.29880700  | 0.32135600  |
| O | 2.84458600  | -0.85278300 | -1.04529500 |
| P | -0.25466400 | 0.82158500  | -1.40020800 |
| P | 1.98923600  | 1.08728800  | 0.67046700  |
| C | 0.37739300  | 1.84233000  | -0.00988600 |
| O | -0.21845300 | 2.68125200  | 0.64125400  |
| H | 0.65440600  | -2.46034200 | -0.96981700 |
| H | 2.85109400  | 1.69277200  | -0.28280600 |
| H | -1.57228100 | -1.63246600 | -1.59632600 |
| H | -1.79860600 | 2.11695600  | 0.46636100  |

4\_06

0 1

|   |             |             |             |
|---|-------------|-------------|-------------|
| C | 1.93619000  | 0.46977200  | 0.46441100  |
| O | 2.32683700  | 0.48237300  | 1.59159200  |
| P | 1.12794600  | 2.02205300  | -0.26723900 |
| P | 2.19430100  | -1.09629100 | -0.64182200 |
| C | 0.50971400  | -1.61298400 | -0.20749400 |
| C | -0.76481100 | 1.79666000  | -0.19057400 |
| O | 0.37033700  | -2.15088200 | 1.01062300  |
| O | -1.39667800 | 2.53042300  | -0.89306300 |
| P | -0.70292900 | -1.12234100 | -1.30978700 |
| P | -1.61779500 | 0.68771600  | 1.09833200  |
| C | -2.01690900 | -0.83771900 | 0.02177900  |
| O | -3.00358500 | -1.48204300 | 0.22290600  |
| H | 1.18100900  | 1.65344400  | -1.63406500 |
| H | -2.89358100 | 1.28120800  | 0.92046200  |
| H | -0.54486500 | -2.42519300 | 1.15453300  |
| H | 2.87418600  | -1.80986000 | 0.38160700  |

4\_07

0 1

|   |             |             |             |
|---|-------------|-------------|-------------|
| C | 2.18199700  | 0.49214300  | -0.02960900 |
| O | 3.12876800  | 1.08224200  | 0.39307400  |
| P | 0.81891100  | 1.42627700  | -0.99421800 |
| P | 2.18159000  | -1.41051800 | -0.05265700 |
| C | 0.42640800  | -1.53009600 | 0.38986000  |
| C | -0.67512400 | 1.85312700  | 0.09864900  |
| O | 0.16531300  | -1.49898100 | 1.69727400  |
| O | -0.90459800 | 3.01859600  | 0.26412500  |
| P | -0.57695500 | -1.54360100 | -1.00165500 |
| P | -1.90287000 | 0.65449100  | 0.88194700  |
| C | -2.14329600 | -0.78180600 | -0.31193500 |
| O | -3.24581800 | -1.12084600 | -0.64560400 |
| H | -3.06505000 | 1.38225600  | 0.53939600  |
| H | -0.78748500 | -1.46566700 | 1.86518100  |
| H | 2.73084100  | -1.53921500 | 1.24944500  |
| H | 1.42233900  | 2.67460200  | -0.70801100 |

4\_08

0 1

|   |             |             |             |
|---|-------------|-------------|-------------|
| C | 2.25309600  | 0.48324400  | -0.07020000 |
| O | 3.25466300  | 1.09844900  | 0.12198200  |
| P | 0.79602700  | 1.37367700  | -0.94591800 |
| P | 2.24776100  | -1.41939100 | 0.24203600  |
| C | 0.42686200  | -1.45058400 | 0.44570100  |
| C | -0.71219500 | 1.81878400  | 0.11962700  |
| O | 0.14180900  | -1.30768000 | 1.74325100  |
| O | -0.91769400 | 2.98476700  | 0.30678000  |

|   |             |             |             |
|---|-------------|-------------|-------------|
| P | -0.53671500 | -1.52447300 | -0.96580700 |
| P | -2.00377600 | 0.63372100  | 0.82336500  |
| C | -2.15969600 | -0.81869000 | -0.35893300 |
| O | -3.23413000 | -1.19084400 | -0.74454900 |
| H | -3.14756500 | 1.36131300  | 0.42503500  |
| H | -0.80362100 | -1.14949400 | 1.89206900  |
| H | 1.37965300  | 2.64042400  | -0.70215700 |
| H | 2.21650400  | -1.67932100 | -1.15696700 |

4\_09

0 1

|   |             |             |             |
|---|-------------|-------------|-------------|
| C | 2.28911700  | 0.09124600  | -0.11761600 |
| C | -0.18113000 | 1.42798200  | 0.60291300  |
| C | -2.45236000 | -0.31204000 | -0.19793700 |
| C | -0.04182500 | -1.32850400 | -0.19614500 |
| P | -1.35817100 | -1.44756500 | 0.86476400  |
| P | -1.87059600 | 1.53659500  | -0.25163800 |
| H | -1.43930400 | 1.43708600  | -1.59888200 |
| P | 1.48884800  | 1.58160700  | -0.34662300 |
| P | 1.70733200  | -1.63481300 | 0.27980900  |
| O | -0.13173400 | 1.53789400  | 1.79637400  |
| O | -3.48551300 | -0.59656600 | -0.71320000 |
| O | -0.22167300 | -0.95159900 | -1.47901100 |
| H | 0.59784600  | -0.58713400 | -1.84288400 |
| O | 3.60721900  | -0.00072000 | -0.40822700 |
| H | 3.96997600  | 0.88486000  | -0.54471900 |
| H | 1.53107800  | -1.45634100 | 1.67705100  |

4\_10

0 1

|   |             |             |             |
|---|-------------|-------------|-------------|
| C | -2.22077400 | 0.14550800  | -0.01739300 |
| C | 0.39287900  | 1.69453300  | -0.23652500 |
| C | 2.30784200  | -0.54109400 | -0.15585300 |
| C | -0.19453200 | -1.54363600 | 0.13624100  |
| P | 0.79822000  | -1.08405400 | -1.15604500 |
| P | 2.04808900  | 1.22134600  | 0.58541700  |
| P | -1.12773400 | 1.35558900  | 0.86518700  |
| P | -2.00035900 | -1.54656800 | -0.22874800 |
| O | 0.30201400  | 2.37112000  | -1.21754900 |
| O | 3.36432100  | -1.07925400 | -0.06197500 |
| O | 0.25585500  | -1.88052100 | 1.36166100  |
| H | -0.49334500 | -2.08360300 | 1.93346300  |
| O | -3.40316100 | 0.65265800  | -0.39840300 |
| H | -3.49006400 | 1.55838500  | -0.07867800 |
| H | 2.84195700  | 1.82786500  | -0.42325700 |
| H | -0.49649700 | 0.45876700  | 1.75260900  |

4\_11

0 1

|   |             |             |             |
|---|-------------|-------------|-------------|
| C | -2.15290600 | 0.20816100  | 0.09216300  |
| C | 0.38731300  | 1.72635400  | -0.20098700 |
| C | 2.24167400  | -0.56357400 | -0.10747600 |
| C | -0.23046700 | -1.61601800 | -0.02799400 |
| P | 0.78492300  | -0.98519500 | -1.23431700 |
| P | 2.22991400  | 1.35308400  | 0.17030200  |
| H | 2.07545600  | 1.18675300  | 1.57397600  |
| P | -0.95520500 | 1.23457900  | 1.06396800  |
| H | -0.26104100 | 0.19574800  | 1.71682600  |
| P | -2.03520300 | -1.45060900 | -0.35344700 |
| O | 0.07942200  | 2.40519400  | -1.13617000 |
| O | 3.07368100  | -1.25284900 | 0.38585700  |
| O | 0.19248900  | -2.15985200 | 1.12727700  |
| H | -0.57265500 | -2.38704600 | 1.66837700  |
| O | -3.31293200 | 0.82199800  | -0.18258600 |
| H | -3.34314800 | 1.68118300  | 0.25396700  |

4\_12

0 1

|   |             |             |             |
|---|-------------|-------------|-------------|
| C | 2.23369400  | 0.11459500  | -0.12361400 |
| C | -0.21973300 | 1.49788900  | 0.56645200  |
| C | -2.42080800 | -0.33851500 | -0.17924100 |
| C | -0.01849600 | -1.41279600 | -0.17144100 |

|   |             |             |             |
|---|-------------|-------------|-------------|
| P | -1.28977600 | -1.37043300 | 0.94637300  |
| P | -1.85466100 | 1.50080200  | -0.39673800 |
| H | -1.33522000 | 1.24526700  | -1.69139400 |
| P | 1.47955200  | 1.62877400  | -0.32067900 |
| P | 1.66191900  | -1.52444400 | 0.53340800  |
| O | -0.25217000 | 1.68595600  | 1.75080600  |
| O | -3.44257200 | -0.68742900 | -0.67812500 |
| O | -0.20085800 | -1.16811900 | -1.48272600 |
| H | 0.64155000  | -0.94262200 | -1.89543300 |
| O | 3.53066600  | -0.02857800 | -0.48980500 |
| H | 3.91192500  | 0.83851600  | -0.68010400 |
| H | 2.29777900  | -2.24331600 | -0.52267300 |

4\_13

01

|   |             |             |             |
|---|-------------|-------------|-------------|
| C | 2.32114500  | 0.09216600  | -0.04405900 |
| C | -0.27114600 | 1.48451400  | 0.49681200  |
| C | -2.46804100 | -0.39166100 | -0.11637800 |
| C | 0.01223700  | -1.31437400 | -0.23202000 |
| P | -1.26492900 | -1.47520400 | 0.86684800  |
| P | -1.81320300 | 1.33924300  | -0.63120200 |
| P | 1.51187700  | 1.57947700  | -0.24093500 |
| P | 1.76385800  | -1.66467000 | 0.17482000  |
| O | -0.36287800 | 1.89945200  | 1.61646500  |
| O | -3.61853500 | -0.65108200 | -0.29304000 |
| O | -0.20089700 | -0.88423400 | -1.49419900 |
| H | 0.61760100  | -0.55160600 | -1.88865900 |
| O | 3.66608200  | 0.05698400  | -0.20049100 |
| H | 4.00960700  | 0.95976300  | -0.23926400 |
| H | -2.63406500 | 1.96990300  | 0.34243400  |
| H | 1.60747000  | -1.65358400 | 1.58651800  |

4\_14

01

|   |             |             |             |
|---|-------------|-------------|-------------|
| C | 2.27887700  | 0.10107800  | -0.06911900 |
| C | -0.26521600 | 1.51847800  | 0.50448900  |
| C | -2.44465900 | -0.38780500 | -0.14089400 |
| C | 0.01207600  | -1.37612500 | -0.21363100 |
| P | -1.26377900 | -1.44516200 | 0.89529800  |
| P | -1.77046700 | 1.33140900  | -0.67074400 |
| P | 1.51866700  | 1.61646000  | -0.21504900 |
| P | 1.69669300  | -1.57557800 | 0.45745200  |
| O | -0.40262100 | 1.93462400  | 1.61859400  |
| O | -3.58530400 | -0.65510000 | -0.36357100 |
| O | -0.17715800 | -1.02243000 | -1.49994600 |
| H | 0.65789100  | -0.73847000 | -1.89361900 |
| O | 3.60169200  | -0.00047100 | -0.34390200 |
| H | 3.97697400  | 0.88044800  | -0.47327000 |
| H | 2.30012600  | -2.21958500 | -0.66417200 |
| H | -2.63104600 | 1.98393700  | 0.25223700  |

4\_15

01

|   |             |             |             |
|---|-------------|-------------|-------------|
| C | 2.19993000  | 0.27106700  | -0.27128200 |
| O | 2.88170600  | 0.58409900  | -1.18802800 |
| P | 2.00620700  | -1.58196200 | 0.24581500  |
| P | 1.26304700  | 1.63775200  | 0.76195300  |
| C | -0.35998400 | 1.43153000  | -0.05715100 |
| C | 0.17561500  | -1.43199500 | 0.40433100  |
| O | -0.30587400 | 1.86339500  | -1.31422900 |
| O | -0.16525100 | -1.31689200 | 1.68107200  |
| P | -1.91218900 | 1.06805600  | 0.76670500  |
| P | -0.74136700 | -1.21613000 | -1.02201200 |
| C | -2.33526800 | -0.38449000 | -0.32891100 |
| O | -3.42355100 | -0.85462100 | -0.50273200 |
| H | -1.20013300 | 1.85237600  | -1.68479900 |
| H | 0.96212000  | 0.81558300  | 1.87063800  |
| H | -1.00151000 | -0.79231000 | 1.74072700  |
| H | 2.02607800  | -2.01591300 | -1.10406500 |

4\_16

01

|   |             |             |             |
|---|-------------|-------------|-------------|
| C | -0.75590800 | -1.28786600 | 0.81160800  |
| O | -0.88118500 | -0.76167400 | 1.87870100  |
| P | 0.90590800  | -2.06806700 | 0.38488800  |
| P | -2.28834800 | -1.21690100 | -0.40231500 |
| C | -1.74850700 | 0.54259600  | -0.55582700 |
| C | 1.99068400  | -0.61097300 | -0.24007400 |
| O | -2.31224300 | 1.30606100  | 0.34076200  |
| O | 2.75527600  | -0.88107800 | -1.11999900 |
| P | -0.26476600 | 0.82096900  | -1.43372200 |
| P | 2.08173100  | 1.12518900  | 0.55934100  |
| C | 0.42099400  | 1.82487500  | -0.05177200 |
| O | -0.15477800 | 2.65432900  | 0.62451500  |
| H | -1.74266400 | 2.10391100  | 0.49697400  |
| H | 1.47698000  | 0.76725700  | 1.79437800  |
| H | 0.62389700  | -2.50044900 | -0.93278400 |
| H | -1.57619700 | -1.64144600 | -1.55688900 |

4\_17

O 1

|   |             |             |             |
|---|-------------|-------------|-------------|
| C | 1.16447900  | 1.44834400  | 0.41766700  |
| O | 1.20394200  | 1.81092800  | 1.55379100  |
| P | -0.29339600 | 1.83333800  | -0.77427700 |
| P | 2.66743400  | 0.43200400  | -0.29128400 |
| C | 1.57864000  | -1.04127400 | -0.07880300 |
| C | -1.83067300 | 1.07887400  | 0.08730700  |
| O | 1.69511100  | -1.61759700 | 1.07801900  |
| O | -2.59063600 | 1.78670700  | 0.68312800  |
| P | 0.29477900  | -1.26633300 | -1.23852600 |
| P | -2.41914700 | -0.70193500 | -0.25684400 |
| C | -0.91603000 | -1.72856000 | 0.07020400  |
| O | -0.73337500 | -2.42575000 | 1.05468600  |
| H | 0.93184100  | -2.23016900 | 1.23457100  |
| H | -0.50284000 | 3.07385700  | -0.10063800 |
| H | 2.29920800  | 0.57379700  | -1.65620800 |
| H | -3.05209700 | -0.85218900 | 1.00100900  |

4\_18

O 1

|   |             |             |             |
|---|-------------|-------------|-------------|
| C | 1.90279400  | 1.00345400  | 0.14552600  |
| O | 2.63019300  | 1.69004100  | 0.79173900  |
| P | 0.40161300  | 1.77773000  | -0.77275600 |
| P | 2.47146400  | -0.78610000 | -0.24837100 |
| C | 0.87794300  | -1.58871800 | 0.06146100  |
| C | -1.18994900 | 1.55757100  | 0.27914700  |
| O | 0.66867000  | -2.15297300 | 1.22377600  |
| O | -1.41812800 | 2.30450200  | 1.18065500  |
| P | -0.25464800 | -1.25729400 | -1.21744200 |
| P | -2.59337700 | 0.40450400  | -0.32650400 |
| C | -1.67432100 | -1.18497700 | -0.04015100 |
| O | -1.88354600 | -1.94513100 | 0.88866600  |
| H | -0.29017500 | -2.40019600 | 1.28367900  |
| H | 0.66922900  | 3.00291300  | -0.10748100 |
| H | -3.27769600 | 0.41920500  | 0.91501400  |
| H | 3.04654900  | -1.00001900 | 1.03029900  |

4\_19

O 1

|   |             |             |             |
|---|-------------|-------------|-------------|
| C | -0.72906200 | -1.32999900 | 0.78772600  |
| O | -0.91209200 | -0.89382500 | 1.88428400  |
| P | 0.94532000  | -2.06279500 | 0.33727600  |
| P | -2.15616400 | -1.23712900 | -0.55768700 |
| C | -1.76319700 | 0.54496200  | -0.53752300 |
| C | 2.01582000  | -0.57998800 | -0.23951600 |
| O | -2.33467300 | 1.28231000  | 0.37603500  |
| O | 2.78472300  | -0.80866300 | -1.12681500 |
| P | -0.29471900 | 0.84669200  | -1.43522000 |
| P | 2.06470700  | 1.13536600  | 0.59990700  |
| C | 0.40427800  | 1.81378400  | -0.02620600 |
| O | -0.17120500 | 2.65205500  | 0.63823100  |
| H | -1.79239900 | 2.09867200  | 0.51777800  |
| H | 1.44421300  | 0.74196600  | 1.81659400  |

|      |             |             |             |
|------|-------------|-------------|-------------|
| H    | -3.19384300 | -1.17310200 | 0.41355400  |
| H    | 0.65381100  | -2.44710900 | -0.99284400 |
| 4_20 |             |             |             |
| 0 1  |             |             |             |
| C    | 1.54358600  | 1.35203800  | -0.10834500 |
| O    | 2.45511400  | 1.71304900  | -0.79826000 |
| P    | 1.75925900  | -0.05264800 | 1.15142600  |
| H    | 3.16321200  | -0.12556200 | 0.97185400  |
| P    | 0.00424400  | 2.41596600  | -0.04454700 |
| H    | 0.00499000  | 2.81176600  | -1.40179500 |
| C    | -1.53873700 | 1.35721600  | -0.10840600 |
| C    | 1.44294800  | -1.50279800 | -0.01785000 |
| O    | -2.44894200 | 1.72088800  | -0.79863400 |
| O    | 2.18239400  | -2.44359000 | -0.01729300 |
| P    | -1.75887000 | -0.04631300 | 1.15191700  |
| H    | -3.16317400 | -0.11430000 | 0.97326500  |
| P    | -0.00272000 | -1.41474300 | -1.22274700 |
| H    | -0.00534400 | -2.79919300 | -1.52026000 |
| C    | -1.44852600 | -1.49746400 | -0.01754700 |
| O    | -2.19156700 | -2.43542100 | -0.01717600 |
| 4_21 |             |             |             |
| 0 1  |             |             |             |
| 4_22 |             |             |             |
| 0 1  |             |             |             |
| C    | -0.75436500 | -1.38949500 | 0.70259800  |
| O    | -0.77791700 | -1.16254000 | 1.87228300  |
| P    | 0.78636300  | -2.00415900 | -0.22076500 |
| P    | -2.44854200 | -1.14635900 | -0.28400600 |
| C    | -1.79187200 | 0.56180300  | -0.35075500 |
| C    | 1.91823000  | -0.72876800 | -0.06132600 |
| O    | -2.12145400 | 1.26029100  | 0.73363800  |
| O    | 3.17537100  | -1.08415200 | -0.43081200 |
| P    | -0.44839200 | 0.81740700  | -1.40703600 |
| P    | 1.86387300  | 0.97752900  | 0.63879000  |
| C    | 0.54512400  | 1.71461200  | -0.16983100 |
| O    | 0.13445100  | 2.95853500  | 0.17762400  |
| H    | -1.60766900 | 2.08169000  | 0.76091400  |
| H    | -1.90396600 | -1.49604200 | -1.55327100 |
| H    | 3.71908100  | -0.29539800 | -0.53092200 |
| H    | 0.70669900  | 3.31748800  | 0.87256300  |
| 4_23 |             |             |             |
| 0 1  |             |             |             |
| C    | 0.05418500  | 1.75148100  | 0.53793200  |
| O    | -0.37950700 | 2.72538000  | 1.35863300  |
| P    | -1.07484000 | 1.59965500  | -0.90510500 |
| P    | 1.62704400  | 1.11714400  | 0.78055900  |
| C    | 1.78990000  | -0.10775900 | -0.56350000 |
| C    | -1.75419000 | 0.06628500  | -0.61132700 |
| O    | 2.82502400  | 0.21931300  | -1.35788900 |
| O    | -2.67334100 | -0.34491300 | -1.51201400 |
| P    | 0.98981200  | -1.60346600 | -0.81227500 |
| P    | -1.63194700 | -0.96788600 | 0.90420900  |
| C    | -0.12476500 | -1.72086100 | 0.63961400  |
| O    | 0.23809600  | -2.64664500 | 1.55019900  |
| H    | 1.13808500  | -2.93656700 | 1.36249100  |
| H    | -2.98432800 | -1.22254500 | -1.26527400 |
| H    | 0.29464000  | 2.92933900  | 2.02141900  |
| H    | 3.02763300  | -0.51188500 | -1.95720100 |
| 4_24 |             |             |             |
| 0 1  |             |             |             |
| C    | 2.51806600  | -0.56250600 | -0.03109400 |
| C    | 0.03827900  | -1.30978500 | -0.00777800 |
| C    | -1.91754900 | -0.11741500 | -0.01923500 |
| C    | 0.52468200  | 1.55582300  | 0.28927200  |
| P    | 2.12948000  | 1.22147800  | -0.67052500 |
| P    | 1.22742400  | -1.23434100 | 1.19898900  |
| P    | -1.31032700 | 1.44015600  | -0.29854700 |
| P    | -3.75051400 | -0.24013200 | -0.10279300 |



H -3.78226300 -1.54751000 -0.66952900  
H -3.91008300 -0.72335200 1.22705800  
O -1.28957500 -1.30522700 0.30614600  
O 0.27824300 -1.35147900 -1.31660800  
O 3.54566700 -1.08314100 -0.32306900  
O 0.62103800 2.18155600 1.31267300  
H -0.54198700 -1.20100700 -1.80519000  
H 1.56954400 0.73406700 -1.87933700

4\_25

O 1

C -2.20977200 -0.40296900 0.02528600  
C 0.14964400 -1.74831200 -0.03207200  
C 1.68331000 0.20387900 -0.11764700  
C -0.34269400 1.99644600 -0.18364100  
P -1.37439400 0.88767100 1.04460200  
P -1.63554200 -1.95121400 -0.46414200  
P 1.55102200 1.88833400 -0.06354300  
P 3.35408600 -0.55525000 0.04255400  
H 3.05570000 -1.37054500 1.16649600  
H 3.14714200 -1.60798100 -0.88944400  
O 0.52409300 -0.46567400 -0.40560100  
O 0.88315900 -2.56959700 0.41729900  
O -3.51208200 -0.11370200 -0.11860700  
O -0.87710500 2.86357600 -0.80289600  
H -3.97267300 -0.84558100 -0.55061500  
H -2.48519700 1.76989400 1.00838000

4\_26

O 1

C -2.20977200 -0.40296900 0.02528600  
C 0.14964400 -1.74831200 -0.03207200  
C 1.68331000 0.20387900 -0.11764700  
C -0.34269400 1.99644600 -0.18364100  
P -1.37439400 0.88767100 1.04460200  
P -1.63554200 -1.95121400 -0.46414200  
P 1.55102200 1.88833400 -0.06354300  
P 3.35408600 -0.55525000 0.04255400  
H 3.05570000 -1.37054500 1.16649600  
H 3.14714200 -1.60798100 -0.88944400  
O 0.52409300 -0.46567400 -0.40560100  
O 0.88315900 -2.56959700 0.41729900  
O -3.51208200 -0.11370200 -0.11860700  
O -0.87710500 2.86357600 -0.80289600  
H -3.97267300 -0.84558100 -0.55061500  
H -2.48519700 1.76989400 1.00838000

4\_27

O 1

C -2.19354600 0.51709900 -0.14676100  
C 1.53593100 -0.40432500 -0.08575400  
C -0.73884900 -1.88978800 -0.09632600  
H -0.68431000 -0.22289300 1.74600600  
C 0.24052200 1.65003200 -0.09055900  
P -1.37030100 2.21434500 0.05381900  
P -1.77523800 -0.86059200 1.10831100  
P 1.14507600 -2.01725700 0.22510300  
P 3.27035900 0.20859300 -0.22085800  
H 3.36658800 0.83193700 1.05368700  
H 3.82732000 -1.02337300 0.21819900  
O 0.50180500 0.41466000 -0.52605600  
O 1.34352900 2.36195900 0.13924300  
H 1.10536500 3.21089500 0.52817800  
O -1.25295900 -2.50211500 -0.98314800  
O -3.05834500 0.32412000 -0.94570000

4\_28

O 1

C 2.51808100 -0.56256500 -0.03134200  
C 0.03815400 -1.30958100 -0.00778500  
C -1.91767500 -0.11731500 -0.01923600  
C 0.52483700 1.55567200 0.28945100

|   |             |             |             |
|---|-------------|-------------|-------------|
| P | 2.12964800  | 1.22139500  | -0.67033000 |
| H | 1.56976700  | 0.73437200  | -1.87936100 |
| P | 1.22749000  | -1.23461600 | 1.19879900  |
| P | -1.31022000 | 1.44027400  | -0.29855100 |
| P | -3.75065700 | -0.24020500 | -0.10299700 |
| H | -3.78197200 | -1.54808900 | -0.66858000 |
| H | -3.91052200 | -0.72234700 | 1.22723500  |
| O | -1.28961400 | -1.30495200 | 0.30648300  |
| O | 0.27784000  | -1.35094700 | -1.31667700 |
| O | 3.54560800  | -1.08322100 | -0.32344900 |
| O | 0.62126100  | 2.18107600  | 1.31307500  |
| H | -0.54233200 | -1.19955900 | -1.80510300 |

4\_29

0 1

|   |             |             |             |
|---|-------------|-------------|-------------|
| C | -2.24365000 | -0.35689200 | -0.00970100 |
| C | 0.13326000  | -1.60892600 | 0.09579600  |
| C | 1.72558900  | 0.19008800  | -0.17051200 |
| C | -0.40295800 | 1.83295600  | -0.13031500 |
| P | -1.53644900 | 0.92206500  | 1.11120600  |
| P | -1.62466000 | -1.88905600 | -0.45789700 |
| P | 1.48746700  | 1.81573200  | 0.19617600  |
| P | 3.43252400  | -0.49942800 | -0.16086100 |
| H | 3.11239700  | -1.67674300 | 0.56694200  |
| H | 3.31758900  | -1.14102500 | -1.42734200 |
| O | 0.63758000  | -0.54443400 | -0.61705000 |
| O | 0.74360300  | -2.23659600 | 0.90400900  |
| O | -3.48249000 | 0.02332700  | -0.36549900 |
| O | -0.86401300 | 2.46951600  | -1.02683000 |
| H | -0.52578500 | 0.12159000  | 1.69105300  |
| H | 0.13946607  | -2.57602756 | 1.56839201  |

4\_30

0 1

|   |             |             |             |
|---|-------------|-------------|-------------|
| C | 2.26967400  | -0.17624800 | -0.29311700 |
| C | -0.02564800 | -1.46943700 | 0.18914700  |
| C | -1.82157100 | 0.08593500  | 0.04135400  |
| C | 0.27773500  | 1.70268400  | 0.40112700  |
| P | 1.72214100  | 1.36100000  | -0.77980100 |
| P | 1.66858400  | -1.38353900 | 0.99834400  |
| P | -1.47462900 | 1.66497000  | -0.40997200 |
| P | -3.44992400 | -0.67436800 | -0.32542500 |
| H | -2.93250500 | -1.92212400 | -0.76928300 |
| H | -3.68090600 | -1.13749200 | 1.00218100  |
| O | -0.86756900 | -0.60438100 | 0.80413800  |
| O | -0.26789700 | -2.10644100 | -0.78663300 |
| O | 3.29094900  | -0.67161800 | -1.02241600 |
| O | 0.41003900  | 2.08867600  | 1.52485700  |
| H | 3.55570400  | -1.52869400 | -0.67003100 |
| H | 1.33980900  | -0.44012400 | 1.99930800  |

4\_31

0 1

|   |             |             |             |
|---|-------------|-------------|-------------|
| C | -2.24365000 | -0.35689200 | -0.00970100 |
| C | 0.13326000  | -1.60892600 | 0.09579600  |
| C | 1.72558900  | 0.19008800  | -0.17051200 |
| C | -0.40295800 | 1.83295600  | -0.13031500 |
| P | -1.53644900 | 0.92206500  | 1.11120600  |
| P | -1.62466000 | -1.88905600 | -0.45789700 |
| P | 1.48746700  | 1.81573200  | 0.19617600  |
| P | 3.43252400  | -0.49942800 | -0.16086100 |
| H | 3.11239700  | -1.67674300 | 0.56694200  |
| H | 3.31758900  | -1.14102500 | -1.42734200 |
| O | 0.63758000  | -0.54443400 | -0.61705000 |
| O | 0.74360300  | -2.23659600 | 0.90400900  |
| O | -3.48249000 | 0.02332700  | -0.36549900 |
| O | -0.86401300 | 2.46951600  | -1.02683000 |
| H | -3.83829500 | -0.58136700 | -1.02867400 |
| H | -0.52578500 | 0.12159000  | 1.69105300  |

4\_32

0 1

|   |             |             |             |
|---|-------------|-------------|-------------|
| C | -2.52404000 | -0.59012000 | -0.01914000 |
| C | -0.01446100 | -1.29735500 | 0.14310000  |
| C | 1.94226200  | -0.12099400 | 0.01333500  |
| C | -0.55478900 | 1.55260400  | -0.27768700 |
| P | -2.02193200 | 1.05306100  | 0.83620600  |
| P | -1.18413200 | -1.41024700 | -1.07940400 |
| P | 1.32792600  | 1.45411900  | 0.13751100  |
| P | 3.77925100  | -0.21864600 | 0.01448000  |
| H | 3.85189200  | -1.43062400 | 0.76049400  |
| H | 3.87470800  | -0.88797900 | -1.23883500 |
| O | 1.31637000  | -1.34143800 | -0.14189500 |
| O | -0.28326700 | -1.13785000 | 1.43784100  |
| O | -3.66277300 | -0.94114300 | 0.00305400  |
| O | -0.73598200 | 2.29128000  | -1.20803400 |
| H | 0.51791000  | -0.88894700 | 1.91939300  |
| H | -2.92982000 | 1.80163800  | 0.04167500  |

4\_33

O 1

|   |             |             |             |
|---|-------------|-------------|-------------|
| C | 2.04855500  | -0.33354800 | -0.15033200 |
| C | -0.01192100 | -1.78876500 | 0.14882800  |
| C | -1.68832800 | -0.02027600 | -0.18202800 |
| C | 0.65110400  | 1.92425200  | 0.10187800  |
| P | 1.92205600  | 1.11133600  | -1.02667000 |
| P | 0.99271600  | -0.71882400 | 1.32487300  |
| P | -1.23279500 | 1.57930500  | 0.14155500  |
| P | -3.53964200 | -0.16524300 | -0.19995700 |
| H | -3.58351900 | -0.88379700 | -1.42884600 |
| H | -3.58073300 | -1.35408000 | 0.58526300  |
| O | -1.08114500 | -1.20678800 | -0.47212200 |
| O | 0.28560000  | -2.90522300 | -0.14605300 |
| O | 2.93142000  | -1.26059800 | -0.55449200 |
| O | 0.94047800  | 2.92586600  | 0.69967400  |
| H | 1.75046500  | -1.84625200 | 1.74589700  |
| H | 2.67148200  | -2.13052800 | -0.22544400 |

4\_34

O 1

|   |             |             |             |
|---|-------------|-------------|-------------|
| C | -2.30480000 | 0.13447500  | -0.06948900 |
| O | -3.64787600 | 0.14824400  | -0.24317700 |
| P | -1.45356100 | 1.58698500  | -0.33663200 |
| P | -1.84066000 | -1.63664300 | 0.25939600  |
| C | -0.07964500 | -1.38189700 | -0.16904500 |
| C | 0.32641800  | 1.54282900  | 0.38518300  |
| O | 0.01883300  | -1.26554800 | -1.49424700 |
| O | 0.46071800  | 2.13100100  | 1.41998700  |
| P | 1.10119800  | -1.15011700 | 1.03666500  |
| P | 1.95028200  | 1.26040800  | -0.64578200 |
| C | 2.32748700  | -0.28697500 | -0.03845900 |
| O | 3.49724400  | -0.92203500 | -0.21930400 |
| H | 0.88966100  | -0.89247800 | -1.71256100 |
| H | -1.67498700 | -1.52489400 | 1.66711400  |
| H | 4.12669300  | -0.33655100 | -0.65976700 |
| H | -3.94836400 | 1.06054900  | -0.35469900 |

4\_35

O 1

|   |             |             |             |
|---|-------------|-------------|-------------|
| C | 0.81731600  | 1.75439200  | 0.49774200  |
| C | -0.51487000 | -0.88972800 | 0.10688700  |
| C | -1.94911900 | 1.08216800  | -0.41511900 |
| C | 1.77179700  | -0.55688500 | -0.65619600 |
| P | 2.38545600  | 0.86271400  | 0.14432200  |
| P | -0.70779900 | 0.77349100  | 0.95591500  |
| P | -2.04403500 | -0.74257100 | -0.99647800 |
| P | -0.44910300 | -2.44259400 | 1.16780900  |
| H | 0.71721800  | -2.05621800 | 1.89050500  |
| H | -1.33278200 | -1.94468800 | 2.16592800  |
| O | 0.56389300  | -1.04683900 | -0.84786400 |
| O | 2.62449800  | -1.34489500 | -1.30000500 |
| O | -2.51390900 | 2.04966200  | -0.79885200 |
| O | 0.77583100  | 2.95426600  | 0.57006600  |

|      |             |             |             |
|------|-------------|-------------|-------------|
| H    | -2.99301500 | -1.08850100 | 0.00805900  |
| H    | 3.48755600  | -0.91344900 | -1.32462500 |
| 4_36 |             |             |             |
| 0 1  |             |             |             |
| C    | 0.63754700  | -0.84910300 | -0.08017900 |
| C    | -1.77337700 | -1.02413200 | 0.20438100  |
| C    | -0.97923800 | 1.54261700  | -0.57256600 |
| C    | 1.52265900  | 1.38644300  | 0.46117000  |
| P    | 0.65236200  | 0.75177500  | -1.10621100 |
| P    | -2.40627800 | 0.59587000  | 0.06589100  |
| P    | 1.33968700  | -0.16926600 | 1.55140300  |
| O    | -1.06925900 | 2.73299200  | -0.72848200 |
| O    | 2.01844900  | 2.43568500  | 0.69226700  |
| O    | -0.58856900 | -1.57320600 | 0.06889800  |
| H    | 0.08548300  | 0.33783200  | 2.01189100  |
| P    | 1.74472500  | -2.09591400 | -0.94716500 |
| H    | 2.89364200  | -1.25615100 | -0.92491100 |
| H    | 2.14263200  | -2.82011800 | 0.21316500  |
| O    | -2.61269800 | -1.99516400 | 0.54178100  |
| H    | -3.50813500 | -1.63592700 | 0.56852900  |
| 4_37 |             |             |             |
| 0 1  |             |             |             |
| C    | 1.39369200  | 1.19527700  | 0.51156300  |
| C    | -0.78652800 | -0.69637600 | 0.14647300  |
| C    | -1.43793100 | 1.60287900  | -0.53278900 |
| C    | 1.38003300  | -1.23205200 | -0.89272000 |
| P    | 2.48217400  | 0.00308600  | -0.05000600 |
| P    | -0.35471600 | 0.96804800  | 0.88190600  |
| P    | -2.32681500 | -0.08419300 | -0.77492200 |
| P    | -1.08119200 | -2.14673000 | 1.30654600  |
| H    | 0.23555200  | -2.14654400 | 1.85218400  |
| H    | -1.61182800 | -1.36006100 | 2.36842800  |
| O    | 0.01870700  | -1.16893100 | -0.93422800 |
| O    | 1.93219900  | -2.06378700 | -1.54936900 |
| O    | -1.55489400 | 2.64478000  | -1.07736400 |
| O    | 1.81205700  | 2.40344700  | 0.91751100  |
| H    | 2.74408300  | 2.52047700  | 0.68901900  |
| H    | -3.11972500 | 0.14051800  | 0.38993600  |
| 4_38 |             |             |             |
| 0 1  |             |             |             |
| C    | 1.33456100  | 1.08253700  | -0.53934500 |
| C    | -0.80934800 | -0.71581300 | -0.08143000 |
| C    | 1.46215500  | -1.61763000 | 0.25013700  |
| P    | 2.42189700  | -0.03115200 | 0.16045100  |
| P    | -0.38329800 | 0.84483000  | -1.08679100 |
| P    | -2.25100800 | -1.54326800 | -0.96529200 |
| P    | -1.11439700 | 0.13854900  | 1.58359600  |
| O    | 0.13637100  | -1.76842300 | -0.01507000 |
| O    | 2.09342000  | -2.59247900 | 0.53305300  |
| O    | 1.70116000  | 2.34650000  | -0.80195700 |
| H    | -2.83320300 | -2.14341600 | 0.18754700  |
| H    | 2.61633000  | 2.49199000  | -0.52698500 |
| H    | -3.10610100 | -0.40499200 | -0.90854100 |
| C    | -1.08382300 | 1.67748300  | 0.50600000  |
| O    | -1.38917200 | 2.80306800  | 0.70698400  |
| H    | -2.53044800 | 0.05324400  | 1.67226900  |
| 4_39 |             |             |             |
| 0 1  |             |             |             |
| C    | -1.46366100 | 1.09375800  | -0.54050500 |
| C    | 0.82693200  | -0.63876900 | -0.17204300 |
| C    | 1.33346800  | 1.65479100  | 0.55382500  |
| C    | -1.26297200 | -1.25888900 | 0.95925300  |
| P    | -2.45798500 | -0.16363800 | 0.05306100  |
| P    | 0.29641400  | 1.00522000  | -0.90471300 |
| P    | 2.43753800  | 0.10490100  | 0.51729800  |
| P    | 1.12751200  | -2.10298100 | -1.31015600 |
| H    | -0.18304600 | -2.12289300 | -1.87211200 |
| H    | 1.67133800  | -1.33027800 | -2.37439000 |

|   |             |             |             |
|---|-------------|-------------|-------------|
| O | 0.09128500  | -1.10507900 | 0.95575500  |
| O | -1.74360700 | -2.07455700 | 1.68844100  |
| O | 1.32349200  | 2.63649700  | 1.21105700  |
| O | -1.97680800 | 2.25343200  | -0.98028000 |
| H | 2.21692300  | -0.28887700 | 1.86315700  |
| H | -2.91491500 | 2.30181000  | -0.75197800 |

4\_40

O I

|   |             |             |             |
|---|-------------|-------------|-------------|
| C | -1.33302500 | 1.08290800  | -0.48967600 |
| C | 0.80259200  | -0.72871000 | -0.05439500 |
| C | 1.06128600  | 1.68598700  | 0.38859200  |
| C | -1.47475000 | -1.62692700 | 0.19658600  |
| P | -2.41953900 | -0.02183800 | 0.22092400  |
| P | 0.34768000  | 0.75497400  | -1.13261800 |
| P | 1.11367600  | 0.21948300  | 1.56621500  |
| P | 2.36161900  | -1.59098400 | -0.65451400 |
| H | 1.89952800  | -1.84660600 | -1.97673500 |
| H | 3.04094100  | -0.39307100 | -1.02280100 |
| O | -0.12574500 | -1.78584400 | 0.02137800  |
| O | -2.12343300 | -2.61499200 | 0.37065100  |
| O | 1.29732400  | 2.84268500  | 0.51912000  |
| O | -1.77360100 | 2.34202100  | -0.65456800 |
| H | 2.53492600  | 0.12847100  | 1.61537900  |
| H | -1.05990900 | 2.93617800  | -0.91526600 |

4\_41

O I

|   |             |             |             |
|---|-------------|-------------|-------------|
| C | 0.60753700  | -0.86702400 | -0.07824700 |
| C | -1.80743400 | -0.97148200 | 0.19557000  |
| C | -0.94146000 | 1.57696400  | -0.56192400 |
| C | 1.57132300  | 1.33531500  | 0.45948300  |
| P | 0.66643800  | 0.73743200  | -1.10294400 |
| P | -2.38487900 | 0.67270300  | 0.09492700  |
| P | 1.14219200  | -0.12168100 | 1.57105800  |
| O | -0.99566400 | 2.76925000  | -0.72180600 |
| O | 2.20047900  | 2.32056200  | 0.65666400  |
| O | -0.64763800 | -1.56104700 | 0.02502700  |
| P | 1.68265200  | -2.14975200 | -0.93211800 |
| H | 2.85802800  | -1.34960200 | -0.90928600 |
| H | 2.04899800  | -2.88353900 | 0.23348600  |
| O | -2.67890100 | -1.91634300 | 0.52423400  |
| H | -3.55988600 | -1.52425400 | 0.56676400  |
| H | 2.45081500  | -0.66516100 | 1.68295700  |

4\_42

O I

|   |             |             |             |
|---|-------------|-------------|-------------|
| C | 0.64709500  | -0.88281600 | -0.08161500 |
| C | -1.79535700 | -0.97473200 | 0.28737600  |
| C | -1.01195000 | 1.51153000  | -0.62977500 |
| C | 1.43126000  | 1.25426300  | 0.51610700  |
| P | 0.67191300  | 0.74246100  | -1.06320500 |
| P | -2.44422200 | 0.62448000  | 0.07182700  |
| P | 1.40067100  | -0.15622000 | 1.48500000  |
| O | -1.09316100 | 2.69140500  | -0.86553100 |
| O | 1.92856800  | 2.46747100  | 0.68390400  |
| H | 2.30103400  | 2.56149200  | 1.56882200  |
| O | -0.61706600 | -1.55165500 | 0.12135600  |
| P | 1.63880400  | -2.20082900 | -0.97871600 |
| H | 2.81635000  | -1.41235400 | -1.08375000 |
| H | 2.09723100  | -2.89329900 | 0.18011600  |
| O | -2.67315200 | -1.87491700 | 0.71184100  |
| H | -2.20991200 | -2.71213100 | 0.84608900  |

4\_43

O I

|   |             |             |             |
|---|-------------|-------------|-------------|
| C | -0.79978600 | -0.92210300 | 0.57516200  |
| C | 2.04839800  | -0.79024500 | -0.55136000 |
| C | 0.85251300  | 1.62247600  | 0.27984900  |
| C | -1.93074600 | 0.99358900  | -0.55622800 |
| P | -0.76393500 | 0.92894400  | 0.89643100  |
| P | 2.36587600  | 0.57833200  | 0.68762900  |

|   |             |             |             |
|---|-------------|-------------|-------------|
| P | -2.40563500 | -0.85599700 | -0.49753500 |
| O | 0.92164600  | 2.71801800  | -0.19716500 |
| O | -2.27656600 | 1.86782800  | -1.27780900 |
| O | 2.86716900  | -1.10067800 | -1.37010200 |
| O | -0.91889000 | -1.56075300 | 1.82210800  |
| H | -0.89211700 | -2.51334900 | 1.68439000  |
| P | 0.47562100  | -1.82125000 | -0.46631900 |
| H | -3.26944600 | -0.64186900 | 0.61474700  |
| H | 3.25949100  | 1.29179100  | -0.14895900 |
| H | 0.05401800  | -1.40464400 | -1.75405300 |

4\_44

O 1

|   |             |             |             |
|---|-------------|-------------|-------------|
| C | 0.61989200  | -1.15677300 | -0.44183600 |
| C | -2.01104600 | -0.44163500 | 0.57018900  |
| C | -0.37810700 | 1.70371800  | -0.43145600 |
| C | 2.02888900  | 0.69504800  | 0.47617400  |
| P | 0.97045600  | 0.57871200  | -1.10104900 |
| P | -2.18236200 | 1.18371100  | -0.34313800 |
| P | 1.41691500  | -0.89733800 | 1.26747000  |
| O | -0.08135000 | 2.83997800  | -0.18630700 |
| O | 2.79656500  | 1.52092200  | 0.83671000  |
| O | -2.51124700 | -0.63111900 | 1.64079100  |
| O | 1.33947100  | -1.99106500 | -1.32981100 |
| H | 1.30272300  | -2.89577500 | -1.00115500 |
| P | -1.12626800 | -1.84602000 | -0.35224500 |
| H | -1.50413400 | -1.40906700 | -1.65402800 |
| H | 2.58716000  | -1.68447300 | 1.07551500  |
| H | -2.47214900 | 1.99147600  | 0.78459700  |

4\_45

O 1

|   |             |             |             |
|---|-------------|-------------|-------------|
| C | 0.43081100  | -1.24020500 | -0.23248700 |
| C | -2.32005200 | -0.10428900 | 0.11135800  |
| C | -0.11300400 | 1.70262000  | -0.41384000 |
| C | 2.22645800  | 0.41793200  | 0.18955700  |
| P | 0.90008900  | 0.31865600  | -1.19400400 |
| P | -1.48803100 | 1.40805600  | 0.82711400  |
| P | 1.40978100  | -0.82561300 | 1.33943100  |
| O | 0.20068300  | 2.82730200  | -0.68933000 |
| O | 3.21200300  | 1.06682500  | 0.27642900  |
| O | -3.48942400 | -0.10834900 | -0.16022700 |
| O | 1.01310700  | -2.26672500 | -1.01957600 |
| H | 1.00019500  | -3.08901200 | -0.51900100 |
| P | -1.36606800 | -1.71977700 | 0.03492800  |
| H | -1.66758900 | -1.92614600 | -1.33529000 |
| H | 2.37844100  | -1.86831500 | 1.28266300  |
| H | -2.38381800 | 2.35486400  | 0.27370900  |

4\_46

O 1

|   |             |             |             |
|---|-------------|-------------|-------------|
| C | 0.43246400  | -1.26778100 | -0.32682300 |
| C | -2.23159000 | -0.09864300 | 0.28965300  |
| C | -0.05337500 | 1.68350800  | -0.65624700 |
| C | 2.07765600  | 0.40104800  | 0.51711100  |
| P | 1.13185900  | 0.28891000  | -1.14771900 |
| P | -1.34701000 | 1.50446000  | 0.67923600  |
| P | 1.11799100  | -0.94580600 | 1.42229300  |
| O | 0.17890500  | 2.76765100  | -1.11595700 |
| O | 2.97185100  | 1.10122600  | 0.85169200  |
| O | -3.38029200 | -0.21777000 | 0.62117000  |
| O | 1.10901300  | -2.30628500 | -1.01856700 |
| H | 0.92482900  | -3.14416800 | -0.58378800 |
| P | -1.40272500 | -1.50909600 | -0.62012500 |
| H | 2.15487800  | -1.92217300 | 1.40847000  |
| H | -1.65906700 | -2.44716800 | 0.41774800  |
| H | -2.30911500 | 2.36911300  | 0.10341600  |

4\_47

O 1

|   |             |             |             |
|---|-------------|-------------|-------------|
| C | 0.44857300  | -1.24938500 | -0.26355600 |
| C | -2.30281300 | -0.11688500 | 0.13606100  |

|   |             |             |             |
|---|-------------|-------------|-------------|
| C | -0.13427000 | 1.70372500  | -0.44125400 |
| C | 2.17281600  | 0.48136000  | 0.21638000  |
| P | 0.89904800  | 0.32723900  | -1.20517500 |
| P | -1.47882000 | 1.41002400  | 0.82916000  |
| P | 1.63615800  | -1.05892900 | 1.20210100  |
| O | 0.16218400  | 2.82636800  | -0.74169500 |
| O | 3.00481700  | 1.29347800  | 0.42755700  |
| O | -3.47044800 | -0.13385400 | -0.14195600 |
| O | 0.95725700  | -2.26981400 | -1.11770800 |
| H | 1.07840100  | -3.07579600 | -0.60402700 |
| P | -1.33120400 | -1.72011400 | 0.12083200  |
| H | -2.39580300 | 2.34911700  | 0.29888800  |
| H | -1.68235300 | -2.02571300 | -1.21775000 |
| H | 0.78570800  | -0.26321500 | 2.02376400  |

4\_48

O 1

|   |             |             |             |
|---|-------------|-------------|-------------|
| C | -1.53321900 | -0.98437400 | 0.79078900  |
| O | -1.88639100 | -0.80207300 | 1.90833700  |
| P | -0.08054100 | -2.13362800 | 0.34841500  |
| P | -2.45357300 | -0.01051900 | -0.64467100 |
| C | -1.05905400 | 1.16775500  | -0.62518900 |
| C | 1.11732700  | -0.91347000 | -0.41087900 |
| O | -1.26279100 | 2.31490100  | -0.05849000 |
| O | 1.83236100  | -1.70669300 | -1.32011200 |
| P | 0.57342100  | 0.75884900  | -1.18803400 |
| P | 2.14799700  | -0.02994900 | 0.92620300  |
| C | 1.34104700  | 1.44506700  | 0.41507900  |
| O | 1.08701800  | 2.56589300  | 0.84234500  |
| H | -0.37081400 | 2.69303700  | 0.28378400  |
| H | -0.65665300 | -2.55579200 | -0.88555200 |
| H | -1.88412100 | -0.77962400 | -1.69378200 |
| H | 2.74386200  | -1.39502400 | -1.32857500 |

4\_49

O 1

|   |             |             |             |
|---|-------------|-------------|-------------|
| C | -0.39165500 | -1.26116100 | 0.33157500  |
| C | 2.27560700  | -0.35135000 | -0.14253600 |
| C | 0.39414700  | 1.65282600  | 0.12815100  |
| C | -2.14321200 | 0.30028600  | -0.11687800 |
| P | -0.71715700 | 0.46541300  | 0.98393000  |
| P | 2.07678400  | 1.51485800  | -0.13173100 |
| P | -2.13536600 | -1.36109200 | -0.47435500 |
| O | -0.15519600 | 2.86989300  | -0.04533800 |
| O | -2.93102700 | 1.34132800  | -0.40557400 |
| O | 3.32372300  | -0.86216700 | 0.14138400  |
| O | -0.15383800 | -2.09288400 | 1.42844100  |
| H | 0.07731600  | -2.96911900 | 1.10837700  |
| P | 0.89778500  | -1.31514300 | -1.02537300 |
| H | -1.11028100 | 2.84791700  | 0.09304700  |
| H | -3.65742700 | 1.07401900  | -0.98030400 |
| H | 1.38109100  | -2.60633500 | -0.66134200 |

4\_50

O 1

|   |             |             |             |
|---|-------------|-------------|-------------|
| C | -0.29320700 | -1.32489700 | 0.27557300  |
| C | 2.17112900  | 0.01759400  | -0.13569700 |
| C | -0.07979000 | 1.60400100  | 0.35745800  |
| C | -2.16490400 | 0.21913100  | -0.28755000 |
| P | -0.92757100 | 0.20777600  | 1.16586500  |
| P | 1.47692600  | 1.69191600  | -0.33405100 |
| P | -1.35665600 | -1.16434000 | -1.27961100 |
| O | -0.78553500 | 2.74858900  | 0.36397100  |
| O | -3.03404900 | 0.99980500  | -0.52152200 |
| O | 3.51707000  | 0.03784900  | -0.31198800 |
| H | 3.82962700  | 0.94951500  | -0.34409500 |
| O | -0.76918200 | -2.45323200 | 0.99220900  |
| H | -0.13091900 | -2.66281600 | 1.68463600  |
| P | 1.54916300  | -1.56543800 | 0.03383900  |
| H | -1.73812000 | 2.56623500  | 0.36958000  |
| H | -2.31431900 | -2.16070900 | -0.94080900 |

## 4\_51

O I

|   |             |             |             |
|---|-------------|-------------|-------------|
| C | 0.38042400  | -1.30122300 | -0.43732900 |
| C | -2.11491600 | -0.05051700 | 0.38250200  |
| C | -0.05078500 | 1.64918600  | -0.50115200 |
| C | 1.97733500  | 0.28103900  | 0.65733700  |
| P | 1.09228700  | 0.32583200  | -1.04681900 |
| P | -1.63076200 | 1.72900900  | 0.15228600  |
| P | 1.18145400  | -1.32923700 | 1.28699900  |
| O | 0.53781900  | 2.85600100  | -0.64283300 |
| O | 2.73747400  | 1.04252100  | 1.14708500  |
| O | -3.04013400 | -0.26484300 | 1.12775700  |
| O | 1.05594300  | -2.24018900 | -1.26538900 |
| H | 0.92225000  | -3.12321600 | -0.90676400 |
| P | -1.46352300 | -1.47564300 | -0.65302800 |
| H | 1.39611800  | 2.78203700  | -1.07801500 |
| H | -1.67445700 | -2.43820400 | 0.37327600  |
| H | 0.18308300  | -0.58887300 | 1.97882800  |

## 4\_52

O I

|   |             |             |             |
|---|-------------|-------------|-------------|
| C | -1.29111500 | 0.41764200  | -0.68579300 |
| C | 1.06915000  | 1.53835700  | 0.62360500  |
| C | 1.48638600  | -0.90152200 | -0.60714000 |
| C | -0.94279500 | -1.34595100 | 0.88760700  |
| P | -0.33847800 | -1.19419500 | -0.81520100 |
| P | 2.40206200  | 0.31882600  | 0.14519700  |
| P | -2.07475600 | -0.07788500 | 0.98141300  |
| O | 2.18627600  | -1.95600900 | -1.07540600 |
| O | -0.55277800 | -2.31662900 | 1.70348400  |
| O | 1.23080400  | 2.20979900  | 1.60920600  |
| O | -2.17457300 | 0.46172900  | -1.78349200 |
| H | -2.78437800 | 1.19521800  | -1.66122700 |
| P | -0.26729400 | 1.98735000  | -0.62148700 |
| H | 1.58662800  | -2.56871100 | -1.52094200 |
| H | -1.00907500 | -2.24771700 | 2.55007800  |
| H | -1.06377900 | 2.66749200  | 0.34327100  |

## 4\_53

O I

|   |             |             |             |
|---|-------------|-------------|-------------|
| C | 0.28671400  | -1.32129900 | -0.29481200 |
| C | -2.16330900 | 0.03324800  | 0.14734000  |
| C | 0.10464800  | 1.58733900  | -0.38212500 |
| C | 2.14907900  | 0.19625600  | 0.32801300  |
| P | 0.96724100  | 0.18584000  | -1.17348500 |
| P | -1.45319100 | 1.70442700  | 0.29707100  |
| P | 1.41140300  | -1.29929000 | 1.23953700  |
| O | 0.81806300  | 2.72767800  | -0.41106500 |
| O | 2.96378700  | 1.00984800  | 0.62955100  |
| O | -3.50450500 | 0.06209500  | 0.36621700  |
| H | -3.81880500 | 0.97339100  | 0.35118000  |
| O | 0.74110600  | -2.36920200 | -1.14725500 |
| H | 0.43753600  | -3.21232600 | -0.79343400 |
| P | -1.55468400 | -1.54489200 | -0.06544800 |
| H | 1.76841400  | 2.53944000  | -0.35292700 |
| H | 0.64093800  | -0.40838400 | 2.03996900  |

## 4\_54

O I

|   |             |             |             |
|---|-------------|-------------|-------------|
| C | -0.32369000 | -1.16699600 | 0.43122900  |
| C | 1.75814800  | 0.04517000  | -0.00480900 |
| C | -0.47732800 | 1.72225700  | 0.27557900  |
| C | -2.38034800 | -0.10684100 | -0.38197400 |
| P | -1.32217100 | 0.27712100  | 1.15297100  |
| P | 1.30298500  | 1.67894100  | -0.24003600 |
| P | -1.14679000 | -1.20940800 | -1.29153100 |
| O | -1.11452600 | 2.73101200  | 0.12327100  |
| O | -3.46358500 | 0.26772000  | -0.68143800 |
| O | 1.09959600  | -1.05896700 | 0.34997000  |
| H | -1.84079400 | -2.44155900 | -1.12863900 |
| O | -0.57517100 | -2.24043400 | 1.25177200  |



|   |             |             |             |
|---|-------------|-------------|-------------|
| H | -0.19970300 | -3.03541600 | 0.85801300  |
| P | 3.54363600  | -0.39395200 | -0.14497300 |
| H | 3.41061800  | -1.16637400 | -1.33392200 |
| H | 3.93376800  | 0.79661900  | -0.81065300 |

4\_55

0 1

|   |             |             |             |
|---|-------------|-------------|-------------|
| C | -0.31881200 | -1.17972300 | 0.44471400  |
| C | 1.74766700  | 0.06104000  | -0.01726500 |
| C | -0.50022100 | 1.71682000  | 0.29647300  |
| C | -2.36009300 | -0.11106000 | -0.40384500 |
| P | -1.33453600 | 0.25721300  | 1.15440200  |
| P | 1.28066700  | 1.69642000  | -0.22034200 |
| P | -1.23442200 | -1.42851800 | -1.20999100 |
| O | -1.14540400 | 2.72186500  | 0.15670600  |
| O | -3.37437100 | 0.36447400  | -0.78365700 |
| O | 1.09668100  | -1.05552800 | 0.30931400  |
| O | -0.53772900 | -2.23464500 | 1.30120300  |
| H | -0.25204000 | -3.05297600 | 0.87946700  |
| P | 3.53728600  | -0.36186000 | -0.16300400 |
| H | 3.41172700  | -1.12596200 | -1.35817500 |
| H | 3.91585800  | 0.83740700  | -0.81999800 |
| H | -0.53512700 | -0.39911100 | -1.90624500 |

4\_56

0 1

|   |             |             |             |
|---|-------------|-------------|-------------|
| C | 2.40566700  | -0.10710400 | -0.35716800 |
| C | -1.77028700 | 0.03378200  | 0.03545800  |
| C | 0.45070700  | 1.74713700  | 0.22806100  |
| C | 0.33634300  | -1.15769700 | 0.41778600  |
| P | 1.18442400  | -1.21095900 | -1.27054500 |
| P | 1.29622300  | 0.32513200  | 1.13350100  |
| P | -1.36556600 | 1.68784000  | -0.14186900 |
| P | -3.48947100 | -0.48048300 | -0.39958500 |
| H | -3.81809600 | -0.96930100 | 0.89647300  |
| H | -4.08239400 | 0.79422800  | -0.20412100 |
| O | -1.08906800 | -1.07227600 | 0.34330900  |
| O | 0.61262400  | -2.31057100 | 1.11553100  |
| H | 0.28404500  | -2.21390100 | 2.01692000  |
| O | 1.08101900  | 2.74495100  | -0.00072700 |
| O | 3.50088900  | 0.25339300  | -0.62859900 |
| H | 1.85401400  | -2.45466500 | -1.11271900 |

4\_57

0 1

|   |             |             |             |
|---|-------------|-------------|-------------|
| C | 0.32769300  | -1.35454000 | -0.32511600 |
| C | -2.24390600 | 0.07662000  | 0.27042600  |
| C | 0.01703600  | 1.60736700  | -0.43322200 |
| C | 2.06938400  | 0.25615100  | 0.45970700  |
| P | 0.99503800  | 0.21542100  | -1.11767500 |
| P | -1.57009700 | 1.79938100  | 0.17733400  |
| P | 1.17864900  | -1.13085500 | 1.37255300  |
| O | 0.72290100  | 2.75481100  | -0.49915800 |
| O | 2.93303000  | 1.01527700  | 0.76243700  |
| O | -3.33172200 | -0.03516300 | 0.78285100  |
| O | 0.93745100  | -2.35878300 | -1.12035100 |
| H | 0.61973800  | -3.22077500 | -0.83607900 |
| P | -1.52967900 | -1.52339400 | -0.42185900 |
| H | 1.67565900  | 2.59068300  | -0.53809300 |
| H | -1.73142900 | -2.21132200 | 0.80420700  |
| H | 2.21285600  | -2.08960000 | 1.17767500  |

4\_58

0 1

|   |             |             |             |
|---|-------------|-------------|-------------|
| C | -0.31175000 | 1.84316300  | 0.14189200  |
| C | -0.33419000 | -1.06360400 | 0.45024400  |
| C | -2.44975200 | -0.04820400 | -0.34382300 |
| C | 1.72582700  | 0.03469500  | -0.21935800 |
| P | 1.54737500  | 1.69990800  | 0.08521100  |
| P | -1.26167500 | 0.49069800  | 1.01166000  |
| P | -1.76778500 | -1.80666300 | -0.57218700 |
| O | 0.78657000  | -0.91948600 | -0.42595800 |

|   |             |             |             |
|---|-------------|-------------|-------------|
| O | -3.33504000 | 0.52015800  | -0.89024400 |
| O | -0.87161600 | 2.82748900  | -0.25668900 |
| H | -1.21989900 | -1.50544600 | -1.84865400 |
| O | 0.04441000  | -1.76340400 | 1.57498400  |
| H | 0.36659700  | -2.63245300 | 1.31183600  |
| P | 3.39365700  | -0.72806600 | -0.34781100 |
| H | 3.28889700  | -1.08559000 | -1.72141800 |
| H | 4.11542600  | 0.47097600  | -0.58533400 |

4\_59

O 1

|   |             |             |             |
|---|-------------|-------------|-------------|
| C | -0.48914200 | -1.26212400 | 0.29161800  |
| C | 2.28005100  | -0.33574900 | -0.09723900 |
| C | 0.37134100  | 1.63172500  | 0.16325400  |
| C | -2.12146800 | 0.57740900  | -0.09765700 |
| P | -0.67578200 | 0.44175000  | 1.08542600  |
| P | 2.01338700  | 1.50774200  | -0.27914700 |
| P | -2.18076000 | -1.22563900 | -0.61706500 |
| O | -0.21200900 | 2.83564600  | 0.05567100  |
| O | -2.70151700 | 1.55759900  | -0.46982500 |
| O | 3.35928900  | -0.76489300 | 0.20887400  |
| O | -0.50799600 | -2.14465100 | 1.38870700  |
| H | -0.53046700 | -3.04959700 | 1.06422000  |
| P | 0.99049500  | -1.50163700 | -0.85565800 |
| H | -1.18049500 | 2.75103800  | -0.00630300 |
| H | -1.71497800 | -0.92768800 | -1.92722300 |
| H | 1.46900400  | -2.64415200 | -0.16130400 |

4\_60

O 1

|   |             |             |             |
|---|-------------|-------------|-------------|
| C | -0.34139900 | -1.33026300 | 0.24518500  |
| C | 2.33999900  | 0.04876100  | -0.14326000 |
| C | 0.05511700  | 1.60401900  | 0.26416500  |
| C | -2.17579400 | 0.30743300  | -0.16922000 |
| P | -0.81315200 | 0.24810100  | 1.15358400  |
| P | 1.62539000  | 1.74495600  | -0.39484300 |
| P | -1.52790900 | -1.09521700 | -1.23464900 |
| O | -0.66366600 | 2.74136000  | 0.26500100  |
| O | -3.04722000 | 1.10941700  | -0.31599200 |
| O | 3.53928700  | -0.04130900 | -0.06418900 |
| O | -0.75121000 | -2.34841400 | 1.13805800  |
| H | -0.59373600 | -3.20443200 | 0.72630300  |
| P | 1.44759900  | -1.61854800 | -0.23600300 |
| H | -1.61480200 | 2.56771200  | 0.34497400  |
| H | 1.84785800  | -1.96839000 | 1.08015300  |
| H | -2.50330800 | -2.05239000 | -0.83702600 |

4\_61

O 1

|   |             |             |             |
|---|-------------|-------------|-------------|
| C | -0.56649800 | -1.20093800 | 0.57011100  |
| C | 2.06990600  | -0.41420200 | -0.30297300 |
| C | 0.33813800  | 1.67894900  | 0.42345900  |
| C | -1.94358400 | 0.36054900  | -0.60365400 |
| P | -1.02334400 | 0.56815900  | 0.94925600  |
| P | 1.93434800  | 1.38377100  | -0.07956700 |
| P | -1.83836200 | -1.32082900 | -0.85751000 |
| O | -0.00152500 | 2.97957700  | 0.52278900  |
| O | -2.54859000 | 1.37008400  | -1.22405900 |
| O | 3.30755700  | -0.73219500 | -0.77404500 |
| H | 3.81341300  | 0.07274900  | -0.93511700 |
| O | -0.86522800 | -1.96226100 | 1.71786600  |
| H | -0.45925200 | -2.83048600 | 1.62140800  |
| P | 1.05587300  | -1.77447100 | -0.15353500 |
| H | -0.83553800 | 3.06307800  | 1.00386300  |
| H | -2.97183300 | 1.05742300  | -2.03188500 |

4\_62

O 1

|   |             |             |             |
|---|-------------|-------------|-------------|
| C | -0.48215400 | -1.10829200 | 0.40438300  |
| C | 2.29277100  | -0.50770500 | -0.29553600 |
| C | 0.44678400  | 1.68733100  | 0.00461800  |
| C | -2.25297100 | 0.42279900  | -0.10789900 |

|   |             |             |             |
|---|-------------|-------------|-------------|
| P | -0.82363300 | 0.67545900  | 0.95882400  |
| P | 2.19230200  | 1.19916900  | 0.54157600  |
| H | 2.86157800  | 1.87007400  | -0.51344800 |
| P | 0.71228500  | -1.19806500 | -1.02654900 |
| P | -2.22648600 | -1.27052600 | -0.33967700 |
| O | 3.36094100  | -1.02916400 | -0.44579600 |
| O | 0.19348000  | 2.62984400  | -0.68998000 |
| O | -3.08495000 | 1.39238200  | -0.45923300 |
| H | -3.80633400 | 1.03806700  | -0.99189600 |
| O | -0.29036100 | -2.04308700 | 1.42104300  |
| H | 0.61662000  | -1.99267100 | 1.73606600  |
| H | 1.05164600  | -2.57061000 | -0.88499100 |

4\_63

O 1

|   |             |             |             |
|---|-------------|-------------|-------------|
| C | 0.36779600  | -1.15207500 | -0.22618400 |
| C | -2.17993200 | -0.46970300 | 0.15913500  |
| C | -0.35934600 | 1.73167900  | 0.02296000  |
| C | 2.23482900  | 0.34455200  | -0.09481400 |
| P | 0.69044800  | 0.55681200  | -1.00659500 |
| P | -2.25363600 | 1.40270000  | -0.05431000 |
| P | -0.75533100 | -1.00791300 | 1.27267600  |
| P | 2.16939400  | -1.30275300 | 0.35282900  |
| O | -2.94467200 | -1.22222200 | -0.38300100 |
| O | 0.07457600  | 2.68145200  | 0.60433000  |
| O | 3.13572300  | 1.30674300  | 0.04144700  |
| H | 3.89647900  | 0.98575500  | 0.53913400  |
| O | 0.02609800  | -2.16831500 | -1.10810000 |
| H | -0.92987200 | -2.17116600 | -1.24081900 |
| H | -1.11329800 | -2.38500000 | 1.30104300  |
| H | -2.33030200 | 1.32976000  | -1.47234400 |

4\_64

O 1

|   |             |             |             |
|---|-------------|-------------|-------------|
| C | -0.57513800 | -1.03762400 | 0.44960000  |
| C | 2.11342700  | -0.45976500 | -0.28591400 |
| C | 0.53680700  | 1.75422400  | 0.13209600  |
| C | -2.21989500 | 0.66478400  | -0.28440900 |
| P | -0.82147300 | 0.74998300  | 0.95453000  |
| P | 2.30713700  | 1.14220900  | 0.27299700  |
| P | -2.32241200 | -1.24552300 | -0.32810800 |
| O | 0.29543300  | 2.85511600  | -0.27747000 |
| O | -2.83930900 | 1.49592200  | -0.85867600 |
| O | 3.15680300  | -1.29492800 | -0.40959800 |
| H | 3.97259600  | -0.84556700 | -0.15035500 |
| H | -2.99557800 | -1.26493600 | 0.92882000  |
| O | -0.27206400 | -1.80782500 | 1.57285000  |
| H | -0.13351900 | -2.71876400 | 1.29920600  |
| P | 0.59268300  | -1.18935800 | -1.00530900 |
| H | 0.95938300  | -2.54638200 | -0.77440500 |

4\_65

O 1

|   |             |             |             |
|---|-------------|-------------|-------------|
| C | -0.68195500 | -0.90553600 | 0.57955100  |
| C | 1.94204400  | -0.72371900 | -0.45502100 |
| C | 0.70178700  | 1.70170000  | 0.21796000  |
| C | -2.09308800 | 0.79945600  | -0.56031400 |
| P | -0.86346100 | 0.93770300  | 0.84355300  |
| P | 2.21980000  | 0.65063700  | 0.72063900  |
| P | -2.37995800 | -1.07544900 | -0.33135100 |
| O | 0.80409000  | 2.77370500  | -0.29549800 |
| O | -2.55218600 | 1.58695600  | -1.31665800 |
| O | 3.00436500  | -1.12186900 | -1.17999700 |
| H | 3.70622200  | -0.46391900 | -1.14535500 |
| H | -3.17101800 | -0.82198100 | 0.82872900  |
| O | -0.59397800 | -1.54888600 | 1.82527400  |
| H | -0.30529700 | -2.45458700 | 1.67487800  |
| P | 0.49964800  | -1.60420900 | -0.71188000 |
| H | 3.11859800  | 1.35960200  | -0.13068100 |

4\_66

O 1

|   |             |             |             |
|---|-------------|-------------|-------------|
| C | -0.30532300 | -1.23069600 | 0.49521000  |
| C | 1.74395100  | 0.07703000  | -0.00607300 |
| C | -0.47609300 | 1.75075000  | 0.36283600  |
| C | -2.15586000 | -0.19729500 | -0.50116600 |
| P | -1.36629200 | 0.24489500  | 1.08517900  |
| P | 1.30996100  | 1.73163800  | -0.11343700 |
| P | -1.25534100 | -1.51683000 | -1.11016100 |
| O | -1.11789700 | 2.76395900  | 0.26277700  |
| O | -3.22362600 | 0.44948200  | -0.93590600 |
| H | -3.50962100 | 0.09633800  | -1.78693200 |
| O | -0.42167900 | -2.33602200 | 1.30387800  |
| H | -0.02485900 | -2.13990700 | 2.15963500  |
| O | 1.11181900  | -1.04793700 | 0.31223900  |
| P | 3.44618300  | -0.38937200 | -0.55389400 |
| H | 4.03456800  | 0.88379100  | -0.33522700 |
| H | 3.85327000  | -0.92975700 | 0.69847400  |

4\_67

O 1

|   |             |             |             |
|---|-------------|-------------|-------------|
| C | -0.49506400 | -0.90166300 | 0.10780300  |
| C | 1.79785500  | -0.49501800 | -0.64996000 |
| C | 0.77858200  | 1.76628600  | 0.48024100  |
| C | -1.97573600 | 1.03077100  | -0.41026500 |
| P | -0.72742600 | 0.75524300  | 0.96097100  |
| P | 2.38189800  | 0.94517800  | 0.11769100  |
| P | -2.03256200 | -0.80045300 | -0.98110500 |
| O | 0.68837000  | 2.96459100  | 0.54578400  |
| O | -2.55881900 | 1.98573400  | -0.79770500 |
| O | 2.71430200  | -1.23846000 | -1.25363000 |
| H | 2.28470100  | -2.03305000 | -1.59665400 |
| H | -2.96743900 | -1.15519900 | 0.03082800  |
| P | -0.22994900 | -2.33253800 | 1.28805000  |
| H | -1.38066400 | -2.07841100 | 2.08132300  |
| H | -0.86172600 | -3.33829600 | 0.50055300  |
| O | 0.58263400  | -1.00046000 | -0.86533200 |

4\_68

O 1

|   |             |             |             |
|---|-------------|-------------|-------------|
| C | -0.38820700 | -1.05106700 | 0.49750500  |
| C | 1.72492900  | -0.02774500 | -0.16102900 |
| C | -0.23690100 | 1.87471600  | 0.16518200  |
| C | -2.41468100 | 0.01386400  | -0.45493900 |
| P | -1.28788900 | 0.54576400  | 0.94575400  |
| P | 1.61191000  | 1.63766000  | 0.18591000  |
| P | -1.73097300 | -1.75703000 | -0.65985200 |
| O | -0.73110300 | 2.89504300  | -0.23118900 |
| O | -3.27943800 | 0.57868500  | -1.03623500 |
| H | -2.54718200 | -2.25384900 | 0.39631700  |
| O | 0.77116500  | -0.97046400 | -0.34043400 |
| O | -0.07056500 | -1.73587700 | 1.64922900  |
| H | 0.27549700  | -2.60185100 | 1.40771300  |
| P | 3.34155400  | -0.75185200 | -0.65562000 |
| H | 4.13695400  | 0.31359500  | -0.15793400 |
| H | 3.48439600  | -1.57374200 | 0.49975300  |

4\_69

O 1

|   |             |             |             |
|---|-------------|-------------|-------------|
| C | -0.79237600 | -0.69696900 | 0.14724500  |
| C | 1.37157200  | -1.23084700 | -0.90367500 |
| C | 1.39181600  | 1.18507000  | 0.51817100  |
| C | -1.43557000 | 1.59724000  | -0.54760300 |
| P | -0.36123000 | 0.97116100  | 0.88105800  |
| P | 2.47612700  | -0.00555200 | -0.05036500 |
| P | -2.33179500 | -0.08817200 | -0.77029200 |
| O | 1.81296800  | 2.39086600  | 0.93005200  |
| O | -1.53665000 | 2.63423000  | -1.10459500 |
| O | 1.91977000  | -2.05121000 | -1.57733700 |
| H | -3.11675400 | 0.15751800  | 0.39367000  |
| P | -0.90056300 | -2.06833100 | 1.42077700  |
| H | -1.91869600 | -1.45964700 | 2.20633300  |
| H | -1.79945400 | -2.90190500 | 0.69830200  |

|      |             |             |             |
|------|-------------|-------------|-------------|
| O    | 0.00878700  | -1.16967200 | -0.93596100 |
| H    | 2.74518200  | 2.50676000  | 0.70192100  |
| 4_70 |             |             |             |
| O1   |             |             |             |
| C    | -0.31310300 | -0.91359800 | 1.56584000  |
| C    | -0.35436700 | 1.45726800  | -0.02885900 |
| C    | 1.17858000  | -0.04330100 | -0.24795500 |
| C    | -1.46008000 | -0.94993400 | -0.93437000 |
| P    | 0.13969500  | -1.65975900 | -0.12264500 |
| P    | 0.66294600  | 0.71693200  | 1.42232600  |
| O    | -2.06560100 | -1.59882500 | -1.73069500 |
| O    | -0.95945800 | -1.34706500 | 2.46303500  |
| P    | 2.94633000  | -0.38719900 | -0.64310800 |
| H    | 2.74713500  | -0.62184600 | -2.03252000 |
| H    | 3.32488700  | 0.97333000  | -0.81138900 |
| O    | -0.37567900 | 2.82590800  | 0.06584600  |
| H    | -0.70044700 | 3.19136400  | -0.76502800 |
| O    | 0.56594300  | 0.99329700  | -1.01937600 |
| P    | -2.06987400 | 0.72417700  | -0.33013900 |
| H    | -2.18583800 | 1.25577300  | -1.64600700 |
| 4_71 |             |             |             |
| O1   |             |             |             |
| C    | -0.43761600 | -1.09285000 | 1.37144000  |
| C    | -0.17791400 | 1.50457200  | 0.11805400  |
| C    | 1.20066700  | -0.12275000 | -0.25841300 |
| C    | -1.62032900 | -0.71833700 | -0.90768500 |
| P    | 0.00691500  | -1.60645900 | -0.41469400 |
| P    | 0.67634600  | 0.44121600  | 1.48155900  |
| O    | -2.54089800 | -1.38613200 | -1.27103000 |
| O    | -1.17048900 | -1.57736500 | 2.16776700  |
| P    | 2.94630100  | -0.59504300 | -0.62332200 |
| H    | 2.81262900  | -0.58090400 | -2.04010000 |
| H    | 3.47096300  | 0.72413900  | -0.54558200 |
| O    | -0.02333900 | 2.82526200  | 0.45470100  |
| H    | -0.31946400 | 3.37196000  | -0.28296400 |
| O    | 0.73867500  | 1.06928100  | -0.90156400 |
| P    | -1.83899600 | 1.13631000  | -0.65529200 |
| H    | -2.64307500 | 0.97227600  | 0.50550000  |
| 4_72 |             |             |             |
| O1   |             |             |             |
| C    | -0.33470200 | -1.43124700 | 1.10220700  |
| C    | -0.91599500 | 1.25665800  | 0.35324000  |
| C    | 1.13924100  | 0.10263500  | -0.22414900 |
| C    | -1.55134100 | -0.63768400 | -1.04021300 |
| P    | 0.15001300  | -1.42277800 | -0.75079800 |
| P    | 0.32063200  | 0.31010500  | 1.49314600  |
| P    | 0.52212200  | 1.77628500  | -0.78980200 |
| O    | -1.88920800 | 0.47436100  | -0.34264700 |
| O    | -2.34824700 | -1.16957600 | -1.74578900 |
| O    | -0.84393800 | -2.25172800 | 1.78448300  |
| H    | -0.04446900 | 1.45954600  | -2.06222800 |
| P    | 2.95328300  | -0.30792700 | -0.22542500 |
| H    | 3.18200300  | -0.11664400 | -1.61798500 |
| H    | 3.41896100  | 0.98744400  | 0.13525000  |
| O    | -1.60666500 | 2.19728900  | 1.05635900  |
| H    | -2.26600800 | 2.58945500  | 0.47238300  |
| 4_73 |             |             |             |
| O1   |             |             |             |
| C    | 1.35747300  | -0.54176100 | 1.27762200  |
| C    | -1.17359500 | -0.12048200 | 0.00840000  |
| C    | 0.71294100  | 1.35954300  | -0.21677400 |
| C    | 0.58425600  | -1.45434100 | -1.00450400 |
| P    | 1.85451100  | -0.12150200 | -0.53167300 |
| P    | -0.08676700 | 0.69350400  | 1.36790800  |
| P    | -0.87150000 | 1.28341500  | -1.25024800 |
| P    | -2.96285800 | -0.49482900 | 0.38543600  |
| H    | -2.69975500 | -1.36163400 | 1.48386400  |
| H    | -3.15884800 | 0.64622000  | 1.21202700  |

|   |             |             |             |
|---|-------------|-------------|-------------|
| O | -0.69218200 | -1.34343000 | -0.55306800 |
| O | 0.93620800  | -2.43321900 | -1.57855700 |
| O | 1.51063600  | 2.49597900  | -0.22351000 |
| O | 1.81144700  | -1.29934500 | 2.06439800  |
| H | -1.56227100 | 2.25338000  | -0.45542700 |
| H | 1.00476100  | 3.23557800  | 0.12563600  |

4\_74

O I

|   |             |             |             |
|---|-------------|-------------|-------------|
| C | 1.32426400  | -0.56178200 | 1.28898000  |
| C | -1.18107400 | -0.09768900 | 0.00062600  |
| C | 0.75168400  | 1.34095500  | -0.23162900 |
| C | 0.57128300  | -1.45594700 | -1.00756300 |
| P | 1.86460400  | -0.16682700 | -0.50290400 |
| P | -0.08824200 | 0.70460700  | 1.38022000  |
| P | -0.89438100 | 1.40385800  | -1.11701600 |
| P | -2.97466700 | -0.45856000 | 0.36914800  |
| H | -2.74179000 | -1.29065700 | 1.50111900  |
| H | -3.17911700 | 0.71380500  | 1.14683600  |
| O | -0.70719300 | -1.31630100 | -0.57528900 |
| O | 0.90053900  | -2.43319300 | -1.60000000 |
| O | 1.58046200  | 2.45504300  | -0.23151300 |
| O | 1.73899600  | -1.32952400 | 2.08824600  |
| H | -0.65222400 | 0.73967100  | -2.35551700 |
| H | 1.06405400  | 3.22960300  | 0.01182200  |

4\_75

O I

|   |             |             |             |
|---|-------------|-------------|-------------|
| C | -0.39296800 | -1.43134200 | 1.10205100  |
| C | -0.86799200 | 1.28294800  | 0.34940200  |
| C | 1.13988300  | 0.05771300  | -0.20823900 |
| C | -1.57920600 | -0.58849200 | -1.03390800 |
| P | 0.10388600  | -1.42849000 | -0.75941900 |
| P | 0.31918600  | 0.29332300  | 1.48235000  |
| P | 0.52015400  | 1.69013200  | -0.91256700 |
| O | -1.87696300 | 0.53644200  | -0.33523100 |
| O | -2.40121700 | -1.10532100 | -1.72020900 |
| O | -0.92903600 | -2.24315200 | 1.77318900  |
| H | 1.22454200  | 2.49548500  | 0.03120600  |
| P | 2.94096400  | -0.39107400 | -0.22607300 |
| H | 3.17996700  | -0.13598200 | -1.60668000 |
| H | 3.43313700  | 0.87605000  | 0.19825200  |
| O | -1.50811400 | 2.27800000  | 1.02231100  |
| H | -2.17617100 | 2.65336600  | 0.43653400  |

4\_76

O I

|   |             |             |             |
|---|-------------|-------------|-------------|
| C | 2.17718300  | -0.85005900 | -0.07680600 |
| C | 0.79984800  | 0.81673700  | 0.11260600  |
| C | -0.60291900 | -1.28531500 | 0.06978200  |
| P | 0.65522900  | -0.58714500 | -1.16806900 |
| P | -0.54425900 | 0.22528800  | 1.29583400  |
| P | 1.01746200  | 2.63544700  | -0.18524700 |
| H | 1.83470900  | 2.48143500  | -1.34190800 |
| H | -0.18366600 | 2.79634300  | -0.92635900 |
| O | 2.04216300  | 0.28814600  | 0.66715300  |
| O | -0.26992300 | -2.56863200 | 0.45701500  |
| O | 3.04635000  | -1.64271100 | 0.01680300  |
| H | -0.96500800 | -2.92553200 | 1.01852300  |
| P | -2.38754300 | -0.99401100 | -0.46690700 |
| C | -2.02144300 | 0.71412500  | 0.20335200  |
| O | -2.51995900 | 1.77661800  | 0.00001000  |
| H | -2.30442500 | -0.74620600 | -1.86586400 |

4\_77

O I

|   |             |             |             |
|---|-------------|-------------|-------------|
| C | 2.47155700  | -0.15147800 | -0.01186000 |
| C | 0.60380300  | 0.94535300  | 0.11908700  |
| C | 0.00933800  | -1.47035500 | -0.04454900 |
| P | 1.02074600  | -0.36131500 | -1.20282400 |
| P | -0.47995500 | -0.12274200 | 1.25676600  |
| P | 0.16745300  | 2.72890200  | -0.13042900 |

|   |             |             |             |
|---|-------------|-------------|-------------|
| H | 0.96639800  | 2.91526300  | -1.29468000 |
| H | -1.01788100 | 2.45724100  | -0.86670900 |
| O | 1.92361200  | 0.85129500  | 0.73809300  |
| O | 0.52820800  | -2.69728200 | 0.14947600  |
| O | 3.54596100  | -0.61905900 | 0.13168300  |
| H | -0.05053200 | -3.20374600 | 0.73087500  |
| C | -1.88424100 | -0.46192100 | 0.10766500  |
| O | -1.33896200 | -1.51197200 | -0.57422200 |
| P | -3.41304000 | 0.22747100  | -0.05695300 |
| H | -3.79933800 | -0.60695100 | -1.15019200 |

4\_78

O I

|   |             |             |             |
|---|-------------|-------------|-------------|
| C | 2.39075500  | -0.59103100 | 0.07810900  |
| C | 0.40659700  | -1.44347700 | -0.07416800 |
| C | 0.06724500  | 1.02089600  | 0.11659400  |
| P | 0.97630000  | -0.18374200 | 1.25997200  |
| P | -0.54176500 | -0.24389800 | -1.19565000 |
| O | 1.74026300  | -1.55311100 | -0.64496700 |
| O | 3.50693600  | -0.23792300 | -0.08448700 |
| C | -1.91387500 | 0.18093700  | -0.03835600 |
| O | -1.26201000 | 1.12316000  | 0.70144000  |
| P | -3.51199500 | -0.33985900 | 0.06450000  |
| H | -3.82153000 | 0.49054000  | 1.18552100  |
| P | 0.87238500  | 2.62063500  | -0.32170800 |
| H | -0.28789200 | 3.18111400  | -0.92407700 |
| H | 0.63973000  | 3.23723900  | 0.93955300  |
| O | -0.17816000 | -2.64491300 | 0.09783300  |
| H | 0.38526000  | -3.20757900 | 0.64067900  |

4\_79

O I

|   |             |             |             |
|---|-------------|-------------|-------------|
| C | 2.15480900  | -0.90457400 | -0.06005600 |
| C | 0.83835100  | 0.81351300  | 0.10674100  |
| C | -0.62580400 | -1.25673500 | 0.07287500  |
| P | 0.65691300  | -0.58880100 | -1.17121200 |
| P | -0.54107500 | 0.24760200  | 1.26218300  |
| P | 1.10297800  | 2.62483600  | -0.18860500 |
| H | 1.86770200  | 2.46377200  | -1.37962500 |
| H | -0.12249100 | 2.82437400  | -0.87991300 |
| O | 2.05920900  | 0.24491700  | 0.67150100  |
| O | -0.32544800 | -2.54550700 | 0.46870900  |
| O | 2.98809000  | -1.73223500 | 0.04935500  |
| H | -0.97276100 | -2.84026500 | 1.11621900  |
| P | -2.36128400 | -0.92919200 | -0.65246200 |
| H | -3.02460400 | -1.36577500 | 0.53947200  |
| C | -2.02204700 | 0.75200800  | 0.19302200  |
| O | -2.55718700 | 1.80481900  | 0.05790900  |

4\_80

O I

|   |             |             |             |
|---|-------------|-------------|-------------|
| C | 0.47314100  | 1.61285200  | -0.88117000 |
| C | 1.24620300  | -0.18886900 | 0.05396800  |
| C | -1.06847100 | 0.16539200  | 1.07489000  |
| P | 0.48836300  | 1.27764100  | 0.98104600  |
| P | -0.11507900 | -1.40414400 | 0.57391300  |
| P | 2.98104100  | -0.83764300 | 0.13627200  |
| H | 3.62119500  | 0.42795800  | 0.27601900  |
| H | 2.95618900  | -1.09414500 | 1.53492600  |
| O | 1.06330700  | 0.43924300  | -1.25210700 |
| O | -1.77572900 | 0.24021500  | 2.26952300  |
| O | 0.12490100  | 2.47913400  | -1.60422200 |
| C | -1.23249800 | -1.25122700 | -0.96601400 |
| P | -2.28370600 | 0.22402500  | -0.37964300 |
| H | -3.20058600 | -0.66440600 | 0.25542900  |
| O | -1.25990400 | -1.88001000 | -1.96831000 |
| H | -1.16693600 | 0.17486000  | 3.01068100  |

4\_81

O I

|   |             |             |             |
|---|-------------|-------------|-------------|
| C | -0.60303400 | 0.51177100  | 1.74181200  |
| C | -1.16677400 | -0.41080700 | -0.13847400 |

|   |             |             |             |
|---|-------------|-------------|-------------|
| C | 0.56499000  | 1.31751500  | -0.71028900 |
| P | -1.12838100 | 1.44955600  | 0.18384700  |
| P | 0.25001100  | -0.43725300 | -1.44838300 |
| P | -2.62548200 | -1.46429300 | -0.58864200 |
| H | -3.60250100 | -0.72411000 | 0.13787100  |
| H | -2.88750300 | -0.79552900 | -1.81668100 |
| O | -0.76358400 | -0.73757700 | 1.21703000  |
| O | 1.00652200  | 2.41599900  | -1.37954400 |
| O | -0.26512200 | 0.77433400  | 2.83996300  |
| C | 1.64766400  | -0.47943900 | -0.26021700 |
| P | 2.65305000  | -1.71679300 | 0.26947600  |
| H | 3.37304300  | -0.89061600 | 1.18562400  |
| O | 1.64302900  | 0.84549300  | 0.09146900  |
| H | 0.25512300  | 2.92177600  | -1.69963000 |

4\_82

0 1

|   |             |             |             |
|---|-------------|-------------|-------------|
| C | -3.08303700 | 1.22522300  | 0.17560500  |
| C | 0.64502600  | -0.29551300 | 0.38638500  |
| C | 2.54786900  | 0.69089400  | -0.60202700 |
| C | -1.51652700 | -0.74019600 | -0.51224800 |
| P | -3.27920000 | -0.19111600 | -0.73047700 |
| P | 1.60401400  | -0.58944300 | -1.22359100 |
| P | 1.57625500  | 1.28532200  | 0.81895000  |
| P | 0.73160800  | -1.62163600 | 1.71448000  |
| H | 0.50202900  | -2.74101100 | 0.86935200  |
| H | 2.14625900  | -1.75304400 | 1.67209800  |
| O | -0.74301300 | 0.08826000  | 0.21048700  |
| O | -1.13668800 | -1.76680700 | -1.00138600 |
| O | 3.68633400  | 1.26343500  | -0.97700200 |
| O | -3.07180800 | 2.20705200  | 0.76526200  |
| H | 2.39978500  | 0.78934600  | 1.87841600  |
| H | 4.02319800  | 0.83982000  | -1.77549300 |

4\_83

0 1

|   |             |             |             |
|---|-------------|-------------|-------------|
| C | 1.19773900  | -0.42616900 | 1.92304700  |
| C | -0.44766300 | 1.75853700  | -0.12323000 |
| C | -1.47493700 | -0.40552800 | -0.23990400 |
| C | 1.28322200  | -0.32738400 | -0.71679100 |
| P | 2.28488800  | -0.99625900 | 0.77257900  |
| P | 1.11886700  | 1.53359400  | -0.77797100 |
| P | -0.25226300 | -1.36952800 | -0.88535600 |
| P | -3.11952200 | -1.18908200 | -0.07052400 |
| H | -3.30402400 | -0.88096400 | 1.30830900  |
| H | -3.87971300 | -0.06778600 | -0.51291800 |
| O | -1.42469100 | 0.89327700  | 0.20037800  |
| O | -0.83990000 | 3.00254400  | 0.15276800  |
| O | 0.49294900  | -0.06613100 | 2.75796100  |
| O | 2.18216100  | -0.70453300 | -1.75783300 |
| H | -1.79007200 | 2.99224600  | 0.31999100  |
| H | 1.85994000  | -0.32235400 | -2.58122600 |

4\_84

0 1

|   |             |             |             |
|---|-------------|-------------|-------------|
| C | -1.73402600 | -0.35093600 | 0.05479500  |
| C | 1.54442500  | 0.10882100  | -1.16900000 |
| C | 2.02899700  | -1.06041100 | 1.19297400  |
| C | -0.69084800 | 1.43899000  | 0.16149600  |
| P | -1.27293000 | 0.29693600  | 1.56941200  |
| P | 1.80768400  | -1.59091800 | -0.39211800 |
| O | -1.28800400 | 2.66900400  | 0.17720900  |
| H | -1.04770300 | 3.14877400  | -0.62432500 |
| O | 2.22777100  | -0.83099600 | 2.30061700  |
| P | -2.42032700 | -1.90397700 | -0.59869800 |
| H | -3.12590100 | -2.23651000 | 0.58730300  |
| H | -3.53724100 | -1.30505900 | -1.24626200 |
| O | -1.29323300 | 0.55313300  | -0.84997100 |
| O | 1.66886300  | 0.18545000  | -2.35696500 |
| P | 1.17124600  | 1.63124800  | -0.11608800 |
| H | 1.01127200  | 2.46196000  | -1.26305700 |



4\_85

0 1

|   |             |             |             |
|---|-------------|-------------|-------------|
| C | 1.82998100  | -1.03172100 | 0.63006100  |
| C | 0.89957900  | 0.59340600  | -0.23610000 |
| C | -1.32238400 | -1.26189200 | -0.65023300 |
| P | 2.23752600  | -0.55275800 | -0.96970500 |
| P | -0.72258500 | 0.47943400  | -1.12411500 |
| P | 1.29020900  | 2.36980800  | 0.22286500  |
| H | 2.66899400  | 2.12114900  | 0.48034100  |
| H | 1.53124700  | 2.78217900  | -1.11703300 |
| O | 0.88318700  | -0.17402300 | 1.03568000  |
| O | -0.98967600 | -2.32752200 | -1.05580700 |
| O | 2.22327800  | -1.95684500 | 1.47262600  |
| C | -1.99696300 | 0.92678900  | 0.21004400  |
| P | -2.60231800 | -0.81410200 | 0.67508600  |
| H | -3.76008700 | -0.84696200 | -0.15227400 |
| O | -2.32457100 | 1.98675900  | 0.63653600  |
| H | 1.71835500  | -1.87854400 | 2.29208600  |

4\_86

0 1

|   |             |             |             |
|---|-------------|-------------|-------------|
| C | -1.47563900 | -1.13830100 | -0.96286200 |
| C | -0.91291900 | 0.72634300  | -0.02240700 |
| C | -0.08431300 | -1.14634200 | 1.35067200  |
| P | -1.88684200 | -0.67083900 | 0.82993600  |
| P | 0.62486300  | 0.56384100  | 1.04285900  |
| P | -1.48867700 | 2.46168100  | -0.35056100 |
| H | -2.83025800 | 2.12984100  | -0.68973500 |
| H | -1.79040400 | 2.75528500  | 1.00802000  |
| O | -0.83695800 | 0.01591000  | -1.29026000 |
| O | 0.35547600  | -2.16240300 | 1.76378800  |
| O | -1.67063500 | -2.06363600 | -1.66717100 |
| C | 2.10570300  | 0.44846700  | -0.02799300 |
| P | 2.34313500  | -0.88518500 | -1.04159200 |
| H | 3.61666000  | -0.44335700 | -1.51789300 |
| O | 2.97991500  | 1.47313700  | 0.09043200  |
| H | 2.69743200  | 2.07070200  | 0.79121500  |

4\_87

0 1

|   |             |             |             |
|---|-------------|-------------|-------------|
| C | -0.41807100 | -1.23019900 | 0.19403700  |
| C | 2.24714300  | -0.24689700 | -0.23898100 |
| C | 0.39851600  | 1.19310500  | -0.13139000 |
| C | -2.22964100 | 0.26381900  | 0.15011300  |
| P | -0.70703200 | 0.36271600  | 1.16033700  |
| P | -2.17888700 | -1.31384900 | -0.49476400 |
| O | -3.14327800 | 1.21024400  | -0.03146000 |
| O | 3.14019600  | -1.22932400 | -0.21437100 |
| O | 0.11355600  | -2.29526000 | 0.90259500  |
| H | 0.02016400  | -3.09306200 | 0.37473400  |
| P | 0.67939200  | -0.39521100 | -1.15782400 |
| P | 2.17019300  | 1.29368600  | 0.50319400  |
| H | -2.78803200 | 2.05788700  | 0.25775100  |
| H | 3.87649900  | -0.99451900 | 0.36208200  |
| O | -0.22383800 | 2.33718600  | -0.62380700 |
| H | 0.35560700  | 2.75783100  | -1.26503300 |

4\_88

0 1

|   |             |             |             |
|---|-------------|-------------|-------------|
| C | 1.20050600  | -0.02602000 | -0.06213800 |
| C | -0.34303500 | 1.47795700  | 0.04421100  |
| C | -0.91167900 | -0.74793300 | 1.51786300  |
| C | -1.04496900 | -0.69248100 | -0.98651800 |
| P | 0.12575700  | -1.62765100 | 0.19442900  |
| P | -1.90173200 | 0.36825000  | 0.34660600  |
| P | 0.21201800  | 0.58869200  | -1.56770300 |
| O | -1.75862500 | -1.32990000 | -1.98565700 |
| O | 0.81722500  | 1.08298400  | 0.75987600  |
| P | 3.01467100  | -0.32066300 | 0.12281200  |
| H | 3.09140000  | -1.29413600 | -0.90976300 |
| H | 3.45022500  | 0.74840400  | -0.71382400 |

|   |             |             |             |
|---|-------------|-------------|-------------|
| O | -0.63040300 | 2.78734600  | 0.22508000  |
| H | 0.17543000  | 3.29654700  | 0.07784800  |
| H | -2.39005500 | -1.93551700 | -1.58776500 |
| O | -0.86477800 | -0.79216400 | 2.70205500  |

4\_89

0 1

|   |             |             |             |
|---|-------------|-------------|-------------|
| C | -0.62012700 | -1.25788000 | 0.06541500  |
| C | 2.16204900  | -0.88894000 | -0.05462500 |
| C | 0.84465300  | 0.82265800  | 0.11531300  |
| C | -2.03576200 | 0.74173300  | 0.19348300  |
| P | -0.54383300 | 0.22716700  | 1.24579800  |
| P | -2.35456100 | -0.93536200 | -0.66616800 |
| O | -2.59465500 | 1.78412900  | 0.09711400  |
| O | 2.98104700  | -1.73243800 | 0.06012600  |
| H | -3.02062300 | -1.39159500 | 0.51244100  |
| O | -0.38003500 | -2.49113900 | 0.64140900  |
| H | -0.43755500 | -3.18166000 | -0.02582300 |
| P | 0.68346500  | -0.56021400 | -1.17971600 |
| P | 0.95414800  | 2.60470900  | -0.34815300 |
| H | 1.47977500  | 3.03969300  | 0.90042900  |
| H | 2.23374700  | 2.48800000  | -0.95923700 |
| O | 2.06257900  | 0.25140200  | 0.68613100  |

4\_90

0 1

|   |             |             |             |
|---|-------------|-------------|-------------|
| C | -1.56032300 | -0.40111700 | 1.22918800  |
| C | 1.63187000  | -0.56074400 | -0.04348000 |
| C | 0.23506000  | 1.86673800  | 0.02135000  |
| C | -1.62322100 | -0.33066700 | -1.21152100 |
| P | -2.18826100 | -1.70630300 | -0.01448600 |
| P | -1.42697200 | 1.06693500  | 0.04632500  |
| P | 1.84768100  | 1.29477900  | -0.01091000 |
| P | 3.26490600  | -1.46506900 | 0.09745000  |
| H | 2.92914700  | -2.47242400 | -0.84241100 |
| H | 3.97563900  | -0.63796300 | -0.81212300 |
| O | 0.59864400  | -1.19050700 | -0.05908300 |
| O | -1.49210400 | -0.33939400 | -2.38866200 |
| O | 0.12406400  | 3.20727000  | 0.02943500  |
| O | -1.37006300 | -0.47712400 | 2.39577100  |
| H | -3.53790600 | -1.24157400 | 0.03106100  |
| H | -0.81182400 | 3.44961400  | 0.05487300  |

4\_91

0 1

|   |             |             |             |
|---|-------------|-------------|-------------|
| C | 1.00682800  | 1.62729400  | 0.57672400  |
| C | -0.62454800 | -0.82579600 | 0.14388300  |
| C | -1.76032400 | 1.27388600  | -0.46999500 |
| C | 1.63580500  | -0.70253100 | -0.73033100 |
| P | 2.44486000  | 0.57200700  | 0.13580500  |
| P | -0.64499900 | 0.85203900  | 0.99260900  |
| P | -2.28390800 | -0.53645200 | -0.73169700 |
| P | -0.60671600 | -2.39664900 | 1.17508600  |
| H | 0.55676400  | -2.06751400 | 1.93073500  |
| H | -1.49886700 | -1.89627200 | 2.16312800  |
| O | 0.36790900  | -1.02530300 | -0.89076000 |
| O | 2.35705400  | -1.54074500 | -1.46443500 |
| H | 3.26491300  | -1.21504200 | -1.50520600 |
| O | -2.05979300 | 2.28117200  | -1.01539800 |
| O | 1.11973400  | 2.81656200  | 0.71669600  |
| H | -1.78716000 | -0.67596000 | -2.05622300 |

4\_92

0 1

|   |             |             |             |
|---|-------------|-------------|-------------|
| C | 1.97435100  | -0.92563400 | -0.28646400 |
| C | -1.66874100 | 0.74497000  | -0.17240700 |
| C | 2.49026000  | 1.50943200  | 0.39119900  |
| C | -0.65728200 | -1.48929400 | -0.13626800 |
| P | 0.80018600  | -2.40222000 | -0.11960400 |
| P | 1.94403800  | 0.18347000  | 1.27826100  |
| P | -1.08370500 | 2.30355000  | -0.50107800 |
| P | -3.39717200 | 0.22634400  | 0.23003100  |

|   |             |             |             |
|---|-------------|-------------|-------------|
| H | -3.15720000 | -0.27293400 | 1.53934400  |
| H | -3.77236100 | 1.51869600  | 0.67779900  |
| O | -0.68446100 | -0.19635400 | -0.41683600 |
| O | -1.86682200 | -2.02365700 | 0.03325000  |
| H | -1.78187900 | -2.94569200 | 0.30026100  |
| O | 2.86174900  | 2.41122900  | -0.21209900 |
| O | 2.71880500  | -0.81035600 | -1.21030900 |
| H | -2.30447000 | 2.94901800  | -0.15996500 |

## 4. References

- [1] D. Heift, Z. Benkő, H. Grützmacher, *Dalton Trans.* **2014**, 43, 831–840.
- [2] G. R. Fulmer, A. J. M. Miller, N. H. Sherden, H. E. Gottlieb, A. Nudelman, B. M. Stoltz, J. E. Bercaw, K. I. Goldberg, *Organometallics* **2010**, 29, 2176–2179.
- [3] M. J. Frisch, G. W. Trucks, H. B. Schlegel, G. E. Scuseria, M. A. Robb, J. R. Cheeseman, G. Scalmani, V. Barone, B. Mennucci, G. A. Petersson, H. Nakatsuji, M. Caricato, X. Li, H. P. Hratchian, A. F. Izmaylov, J. Bloino, G. Zheng, J. L. Sonnenberg, M. Hada, M. Ehara, K. Toyota, R. Fukuda, J. Hasegawa, M. Ishida, T. Nakajima, Y. Honda, O. Kitao, H. Nakai, T. Vreven, J. A. Montgomery, J. E. Peralta, F. Ogliaro, M. Bearpark, J. J. Heyd, E. Brothers, K. N. Kudin, V. N. Staroverov, R. Kobayashi, J. Normand, K. Raghavachari, A. Rendell, J. C. Burant, S. S. Iyengar, J. Tomasi, M. Cossi, N. Rega, J. M. Millam, M. Klene, J. E. Knox, J. B. Cross, V. Bakken, C. Adamo, J. Jaramillo, R. Gomperts, R. E. Stratmann, O. Yazyev, A. J. Austin, R. Cammi, C. Pomelli, J. W. Ochterski, R. L. Martin, K. Morokuma, V. G. Zakrzewski, G. A. Voth, P. Salvador, J. J. Dannenberg, S. Dapprich, A. D. Daniels, Ö. Farkas, J. B. Foresman, J. V. Ortiz, J. Cioslowski, D. J. Fox, *Gaussian 09 Rev. D.01*, Gaussian Inc., Wallingford CT, **2009**.
- [4] E. D. Glendening, C. R. Landis, F. Weinhold, *J. Comput. Chem.* **2013**, 34, 1429–1437.
- [5] E. D. Glendening, F. Weinhold, *J. Comput. Chem.* **1998**, 19, 593–609.
- [6] E. D. Glendening, F. Weinhold, *J. Comput. Chem.* **1998**, 19, 610–627.
